# Supplementary material for: Synthesis of Novel Key Chromophoric Intermediates via C-C Coupling Reactions
Source: MDPI journal article supplement (doi:10.3390/catal12101292), 2022-10-21
Supplement: s1 [file s1]

# Electronic Supplementary Materials

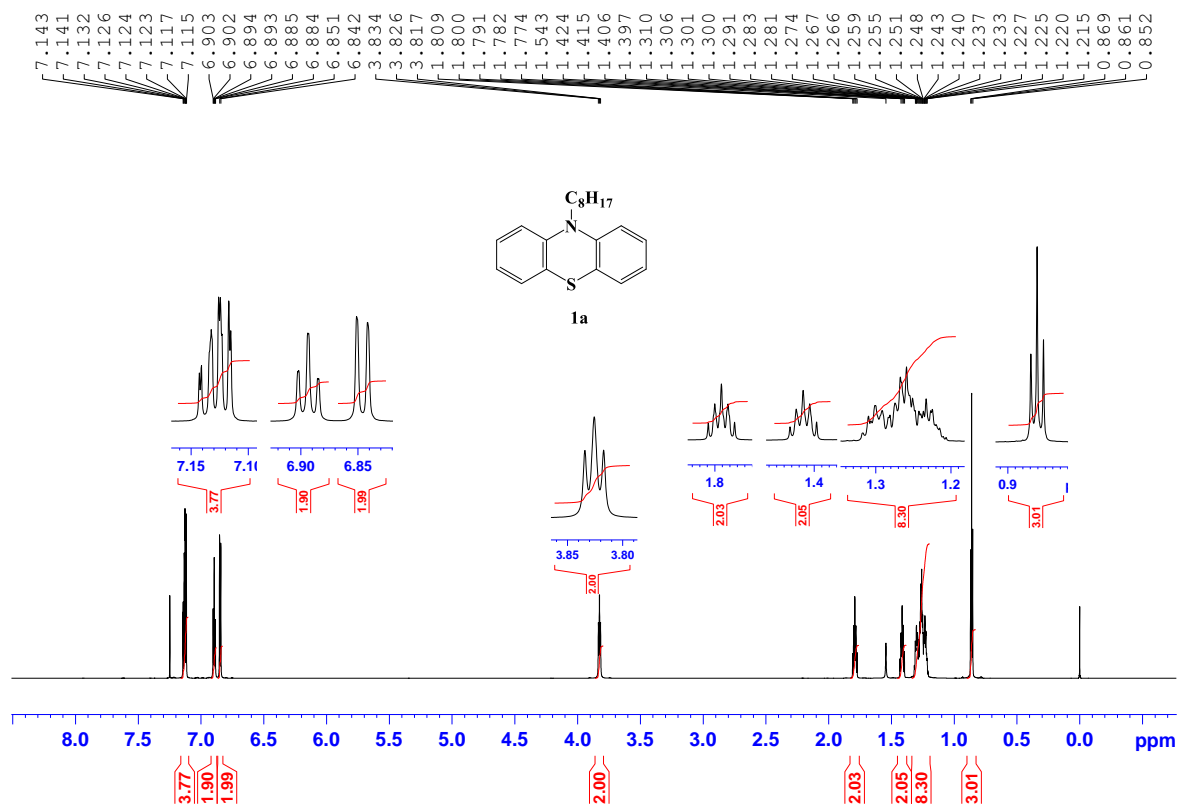

**Figure S1.** <sup>1</sup>H NMR spectrum in CDCl<sub>3</sub> of **1a**.

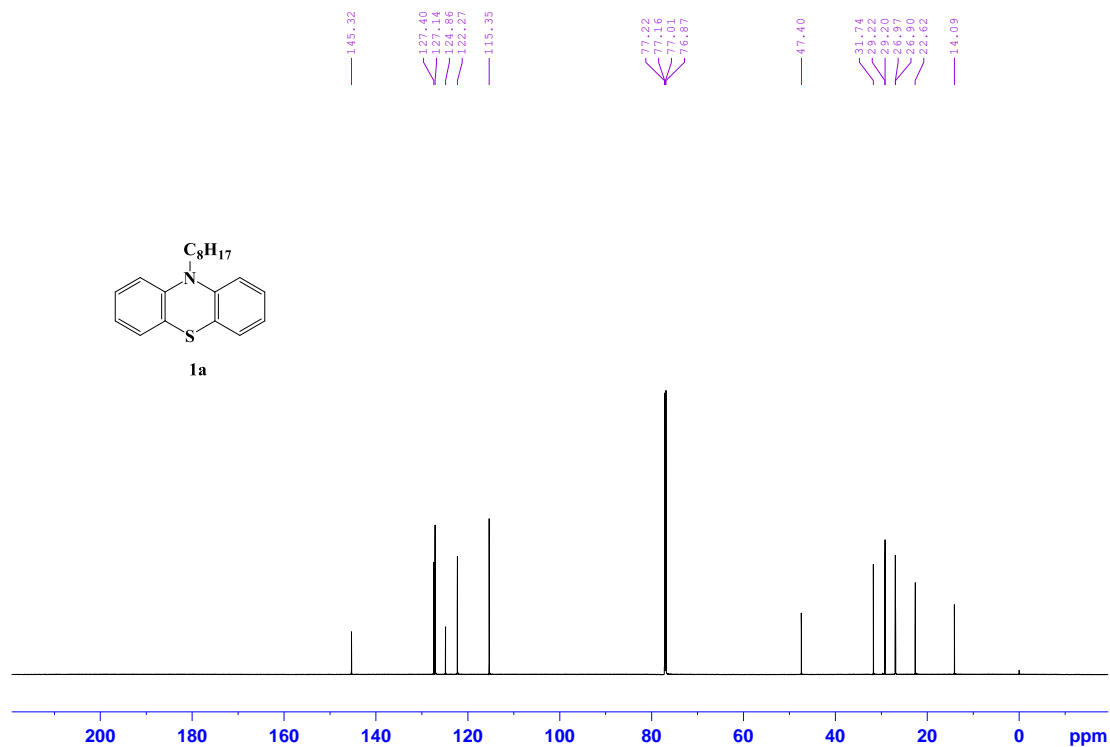

**Figure S2.** <sup>13</sup>C NMR spectrum in CDCl<sub>3</sub> of **1a**.

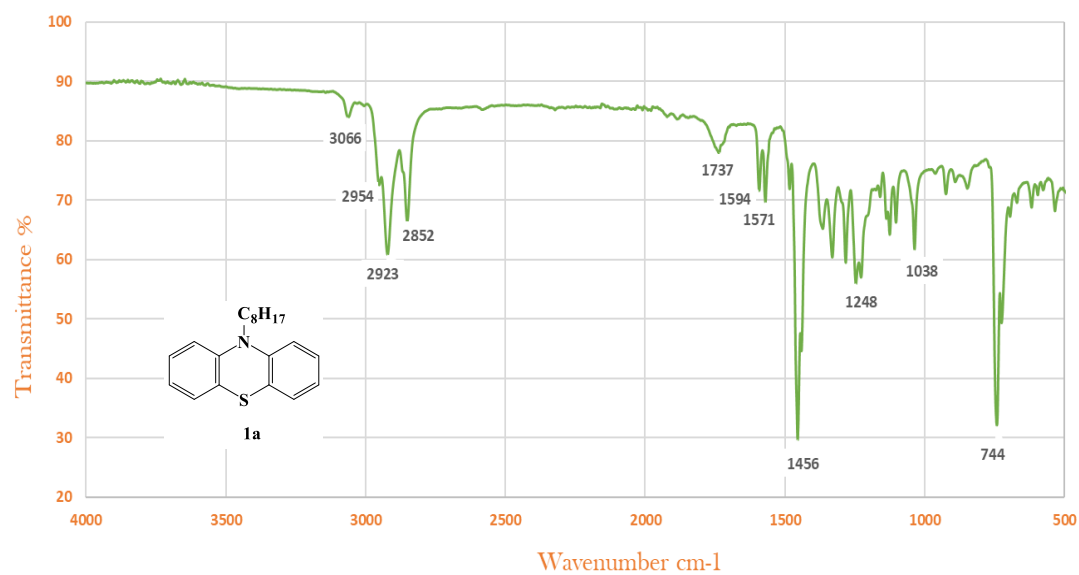

**Figure S3.** FTIR spectrum of **1a**.

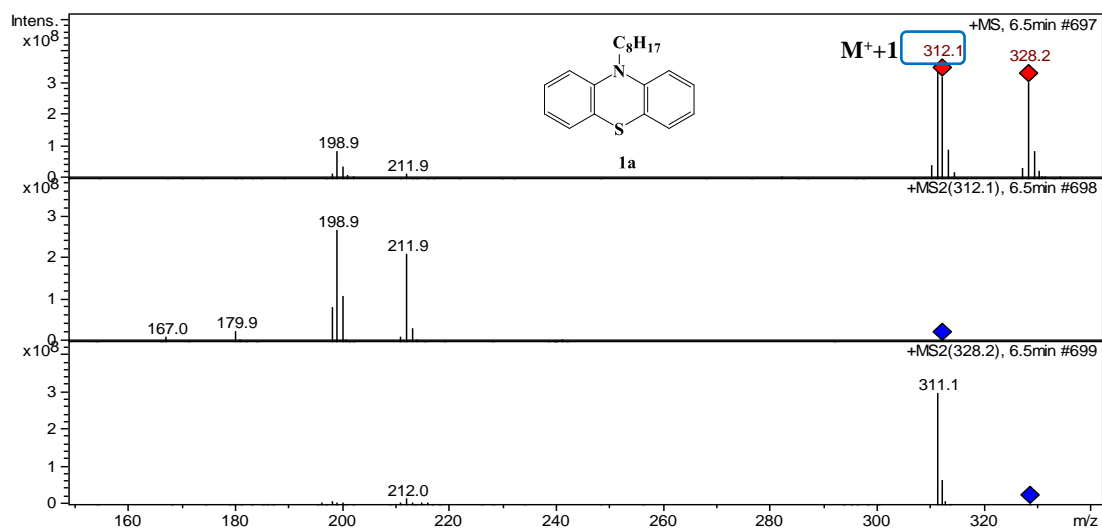

**Figure S4.** Mass spectrum of **1a**.

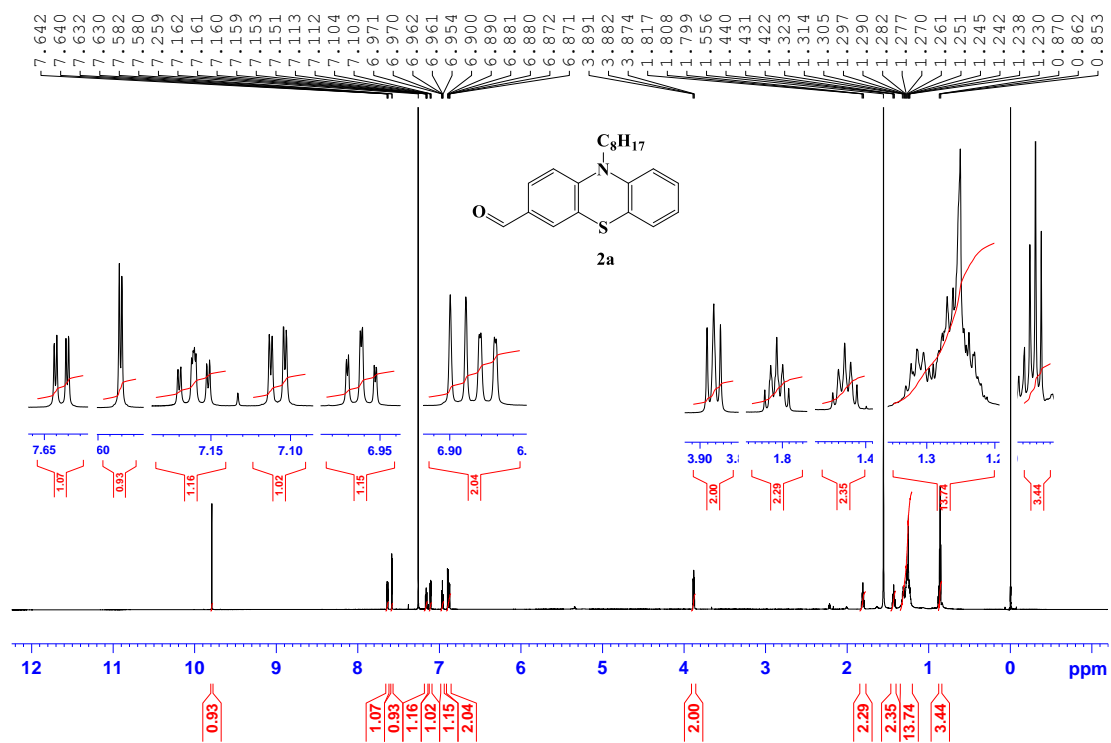

Figure S5. <sup>1</sup>H NMR spectrum in CDCl<sub>3</sub> of 2a.

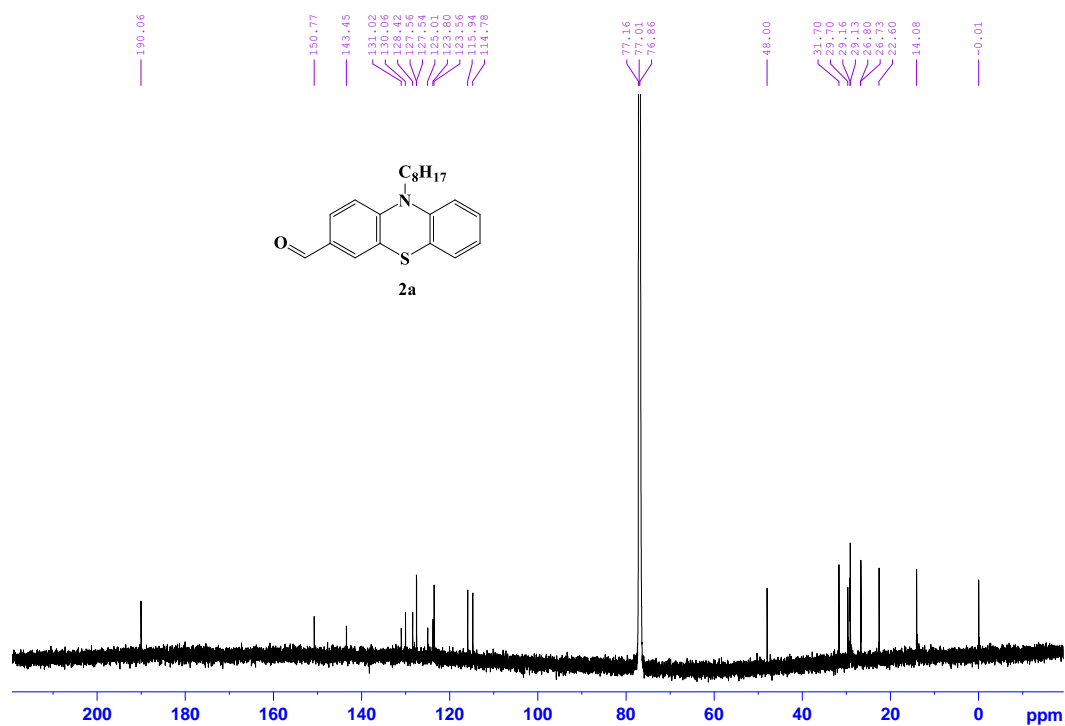

Figure S6. <sup>13</sup>C NMR spectrum in CDCl<sub>3</sub> of 2a.

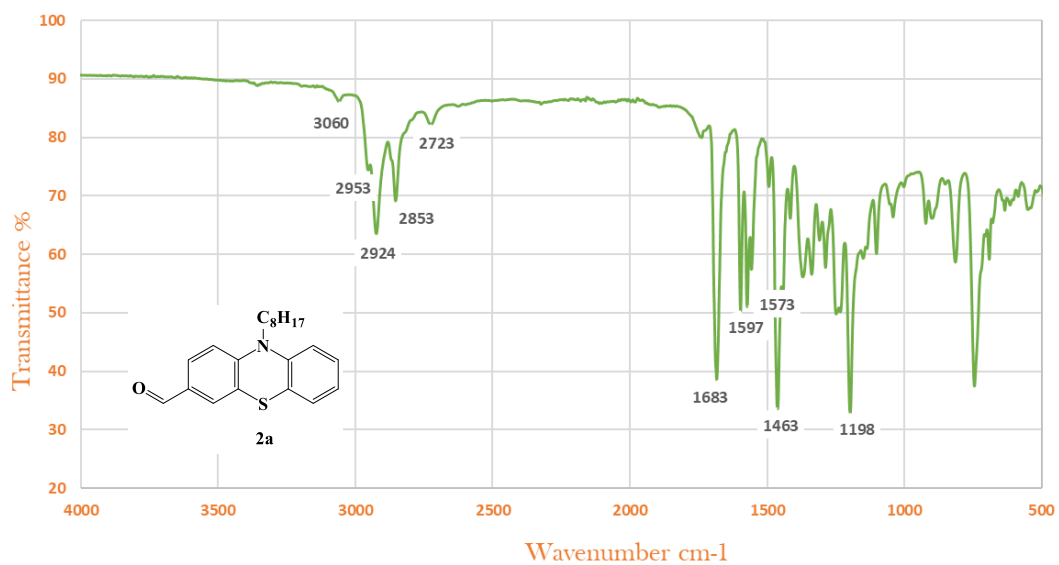

Figure S7. FTIR spectrum of **2a**.

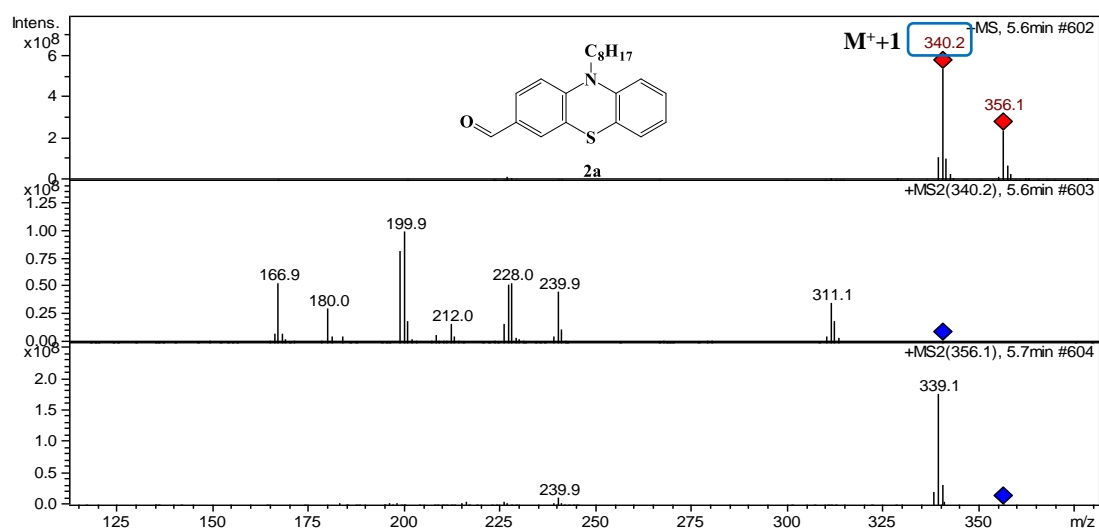

Figure S8. Mass spectrum of **2a**.

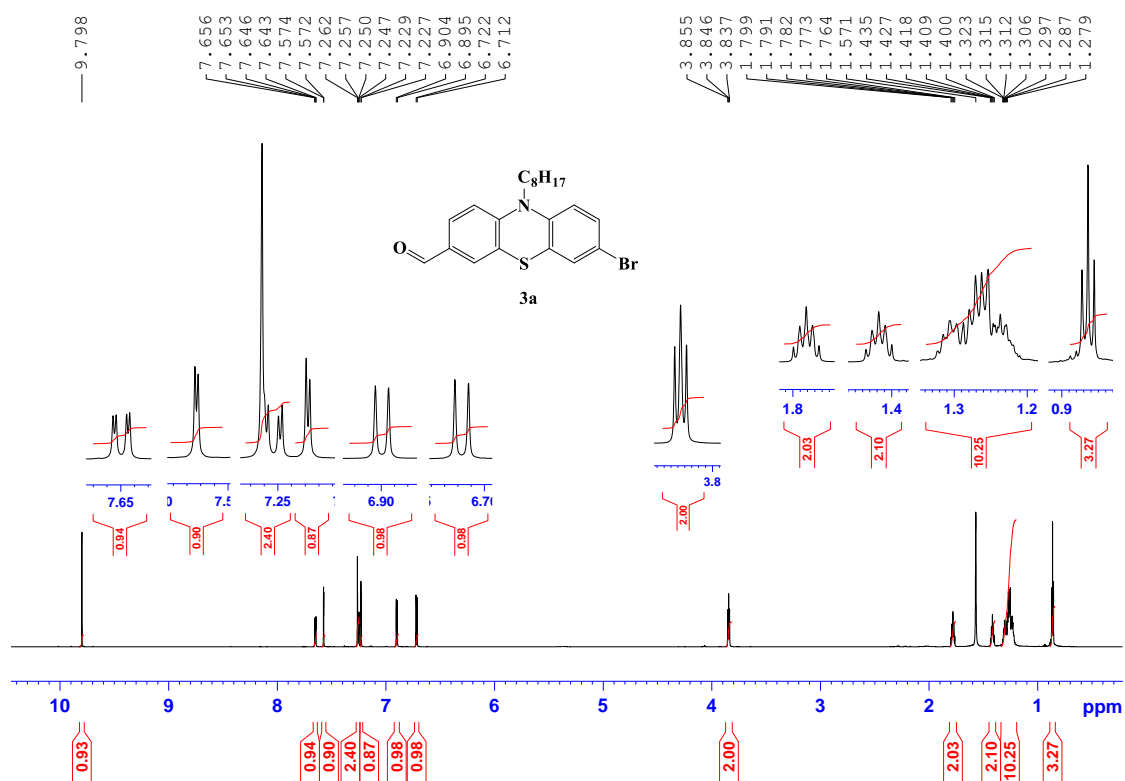

**Figure S9.** <sup>1</sup>H NMR spectrum in CDCl<sub>3</sub> of **3a**.

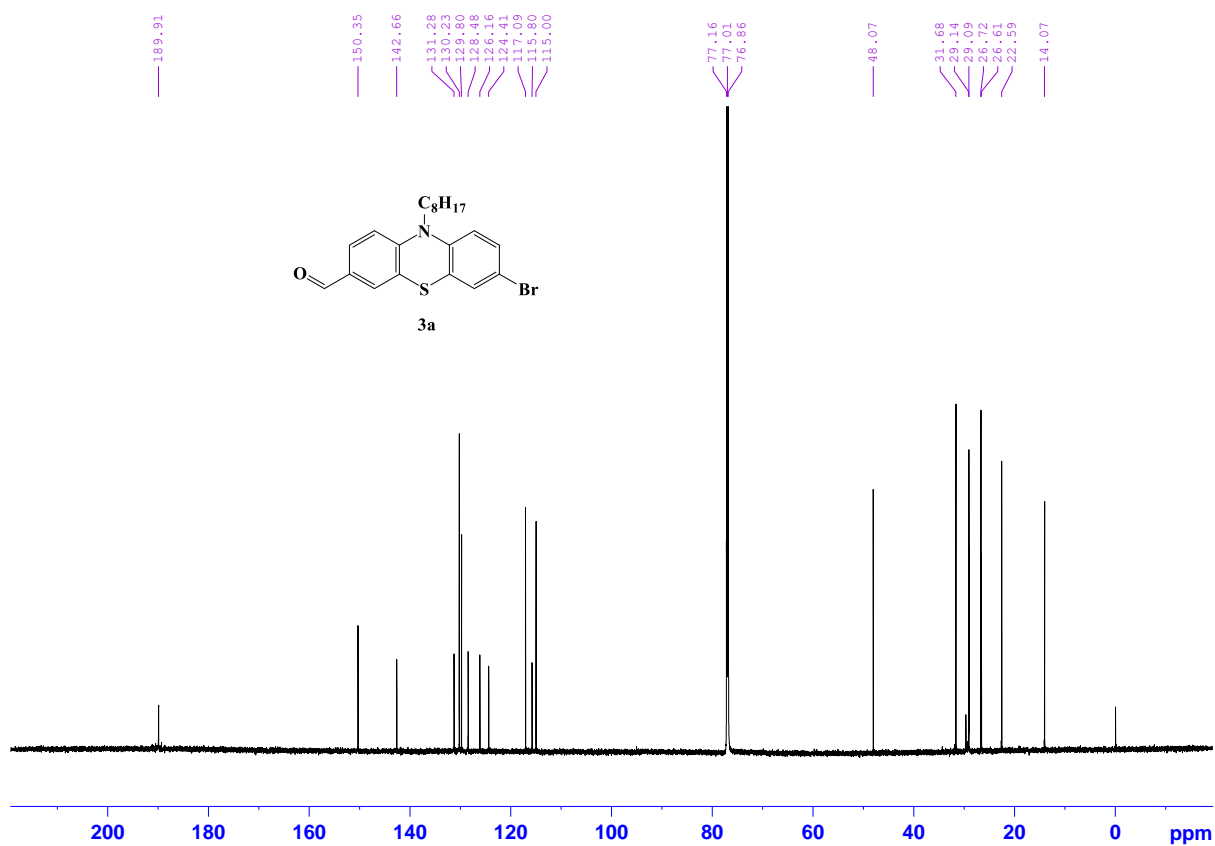

**Figure S10.** <sup>13</sup>C NMR spectrum in CDCl<sub>3</sub> of **3a**.

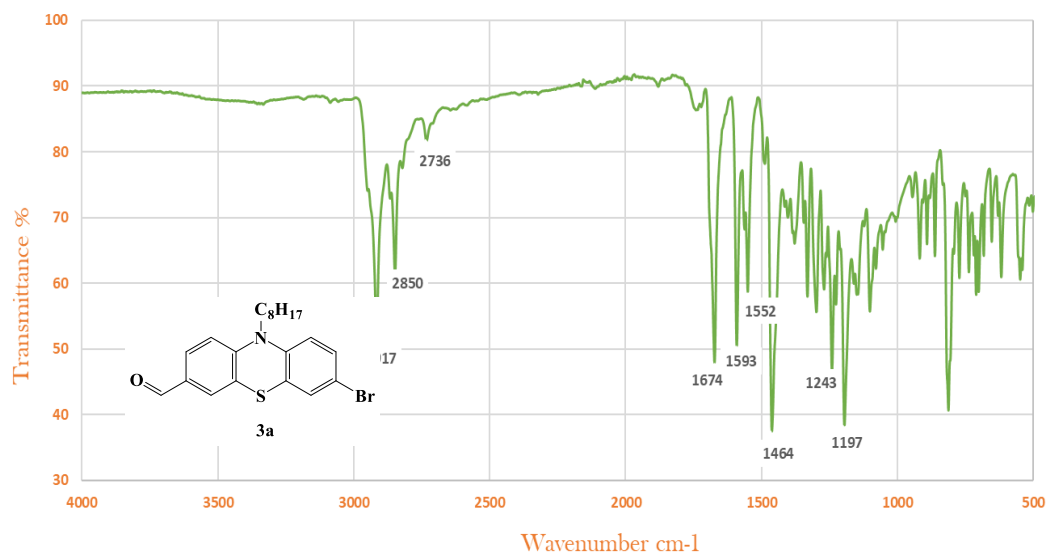

**Figure S11.** FTIR spectrum of **3a**.

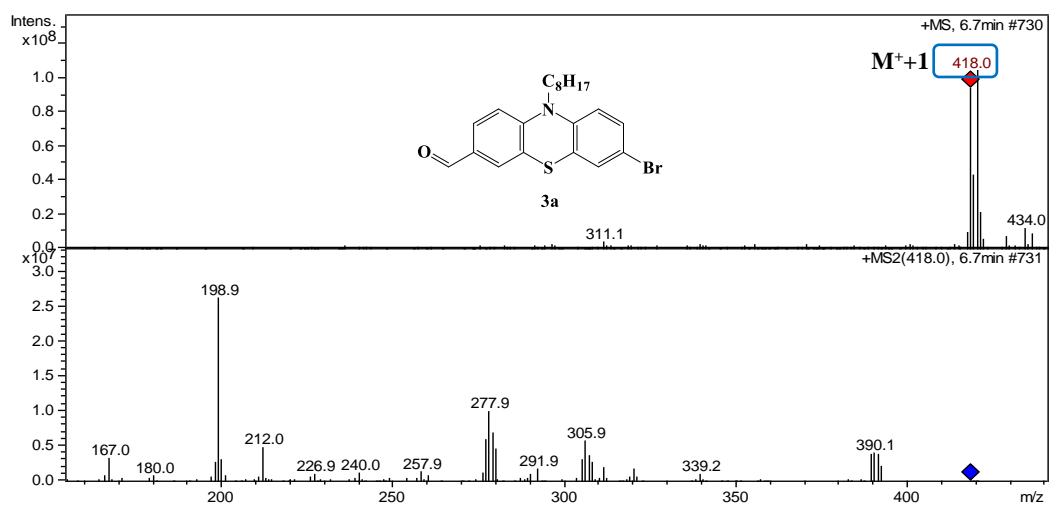

**Figure S12.** Mass spectrum of **3a**.

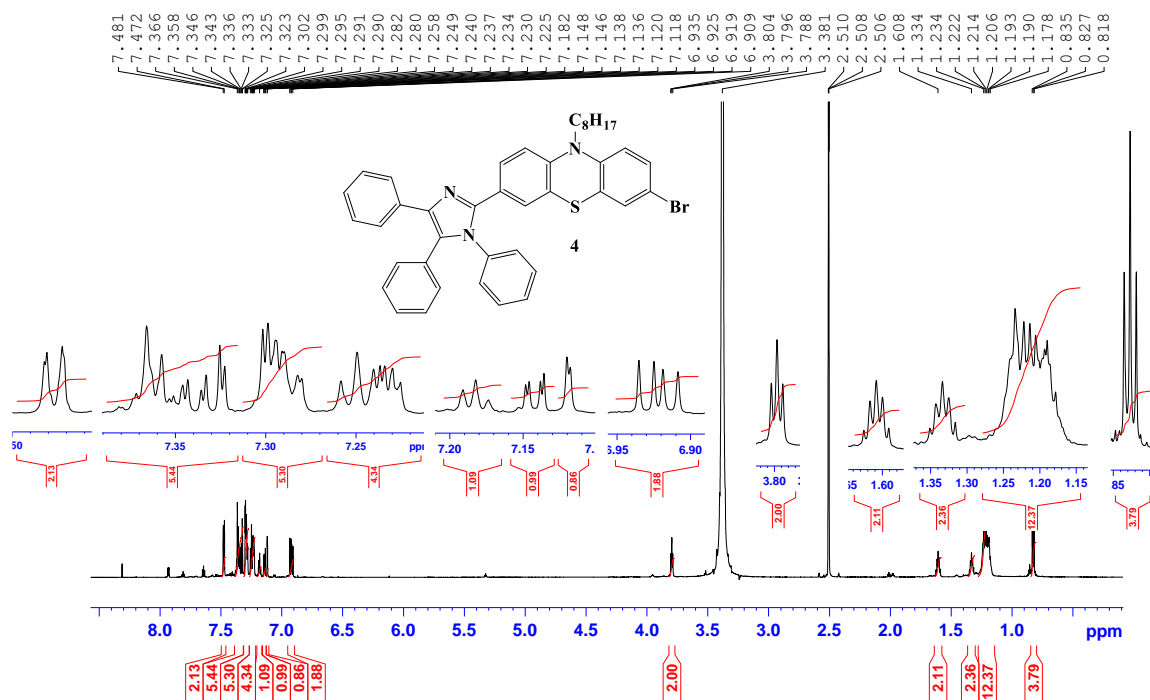

Figure S13. <sup>1</sup>H NMR spectrum in DMSO-d<sub>6</sub> of 4.

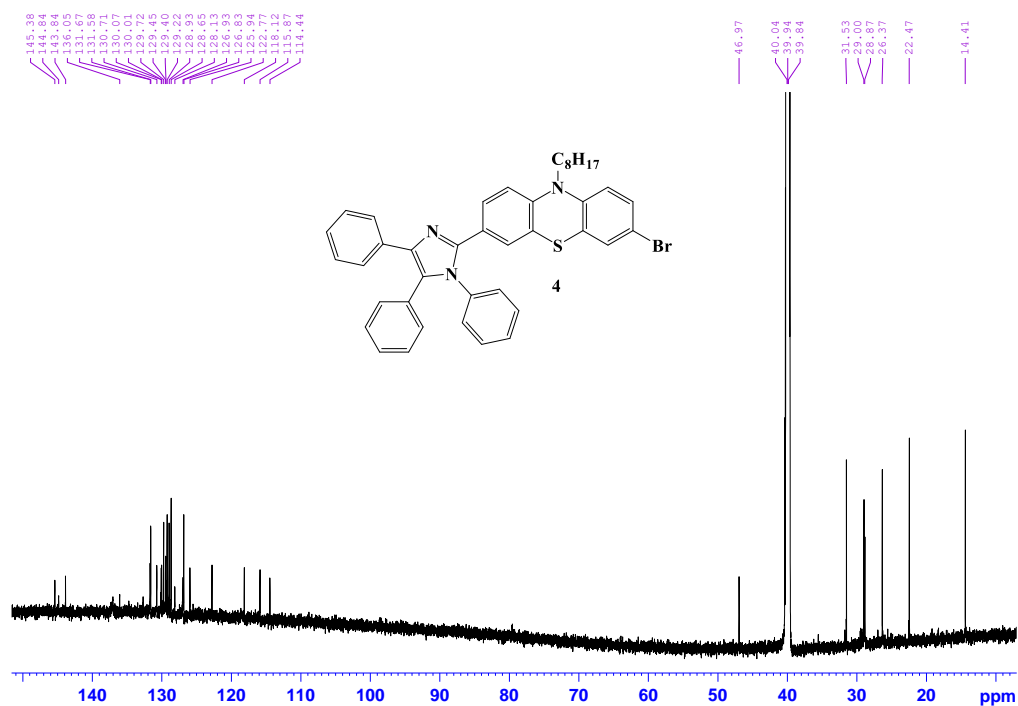

Figure S14. <sup>13</sup>C NMR spectrum in DMSO-d<sub>6</sub> of 4.

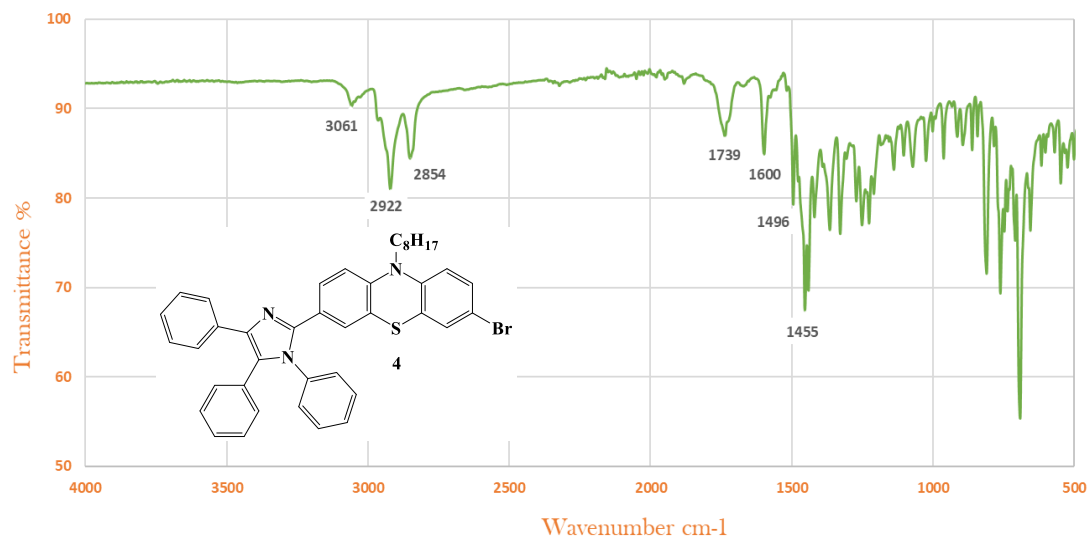

**Figure S15.** FTIR spectrum of **4**.

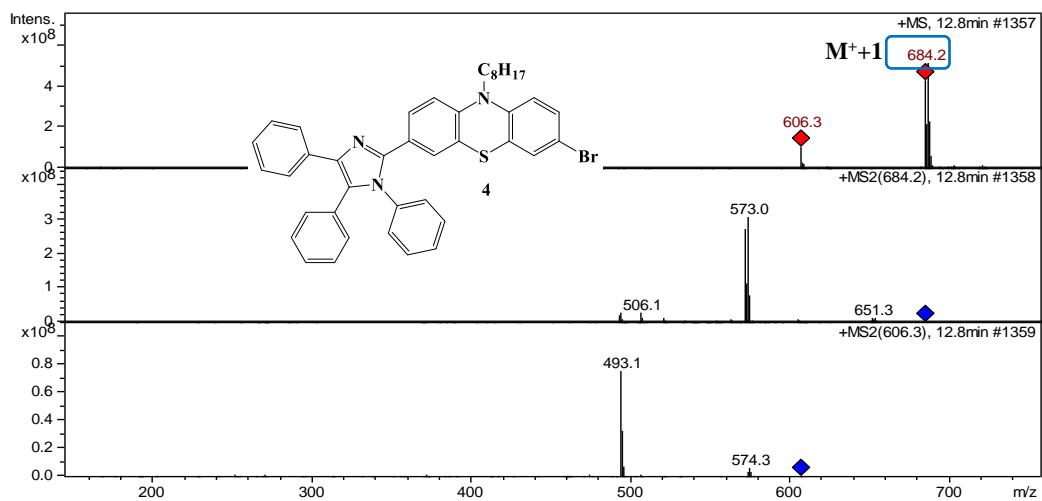

**Figure S16.** Mass spectrum of **4**.



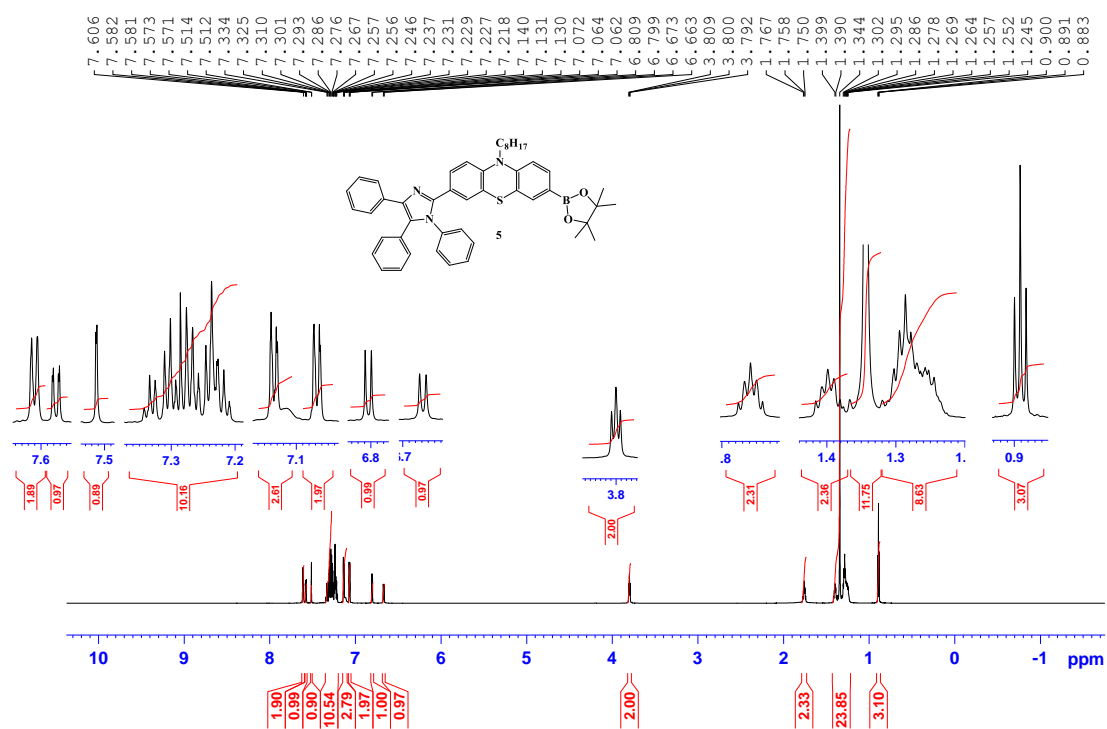

**Figure S17.** <sup>1</sup>H NMR spectrum in CDCl<sub>3</sub> of **5**.

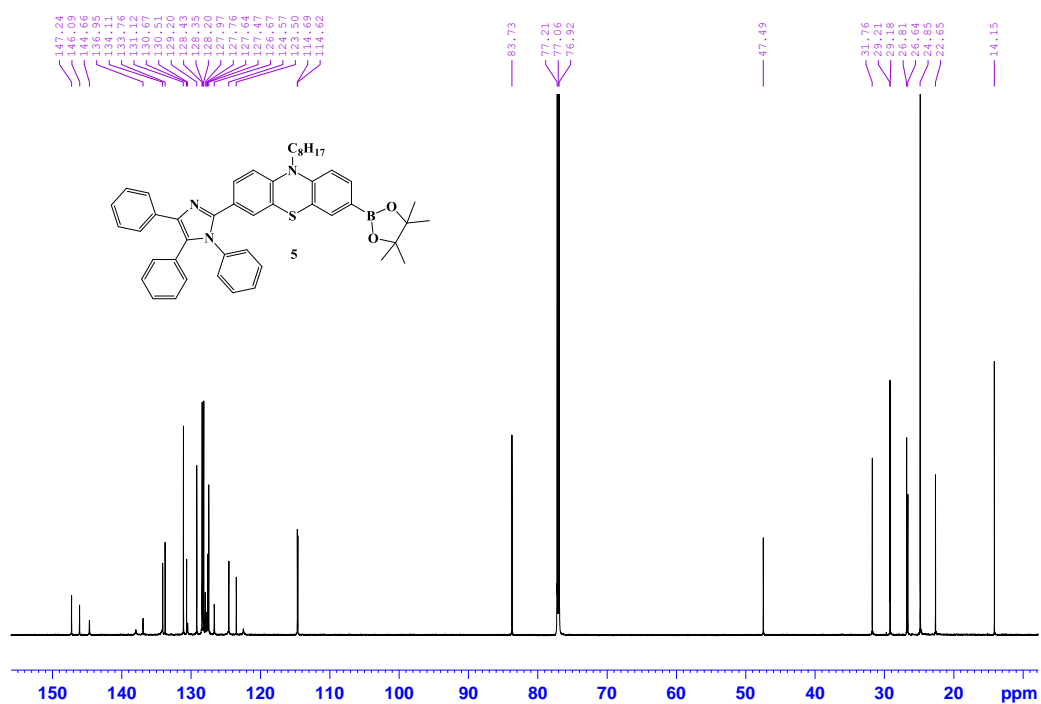

**Figure S18.** <sup>13</sup>C NMR spectrum in CDCl<sub>3</sub> of **5**.

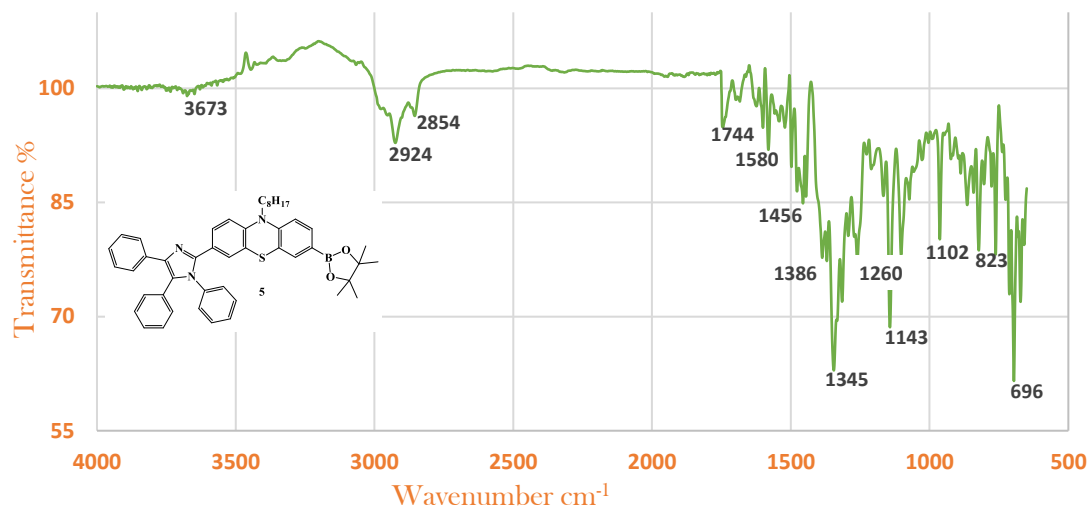

**Figure S19.** FTIR spectrum of **5**.

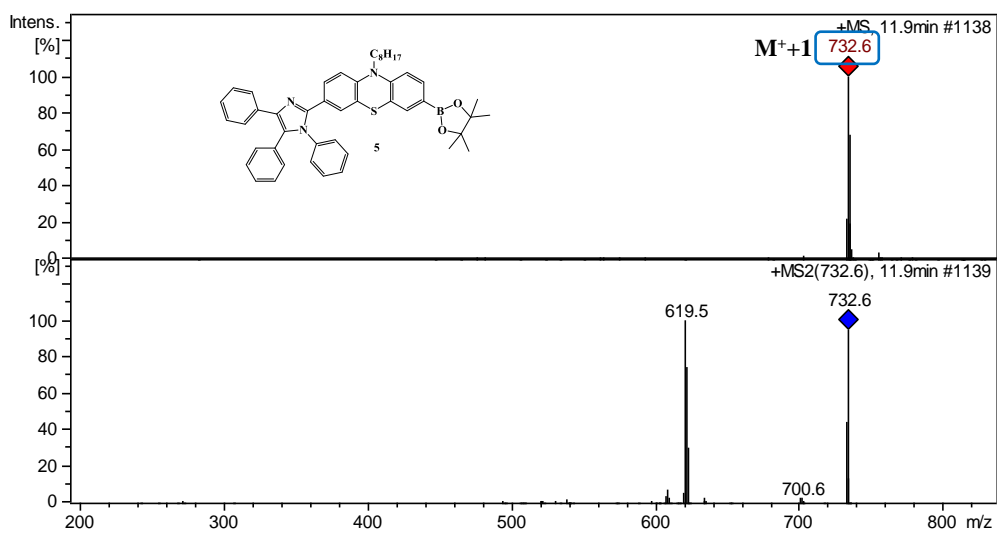

**Figure S20.** Mass spectrum of **5**.

$^1\text{H}$ -NMR

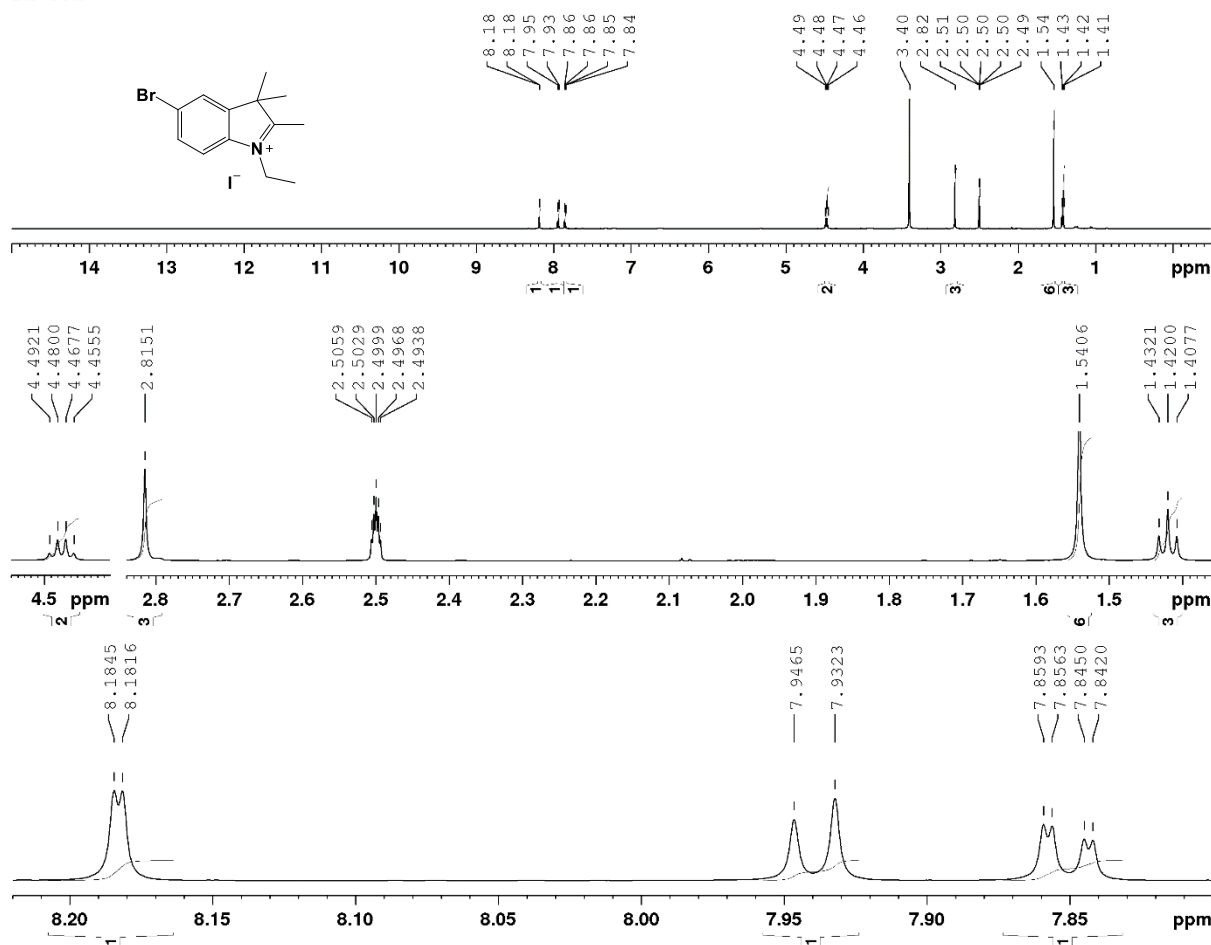

$^{13}\text{C}$ -NMR

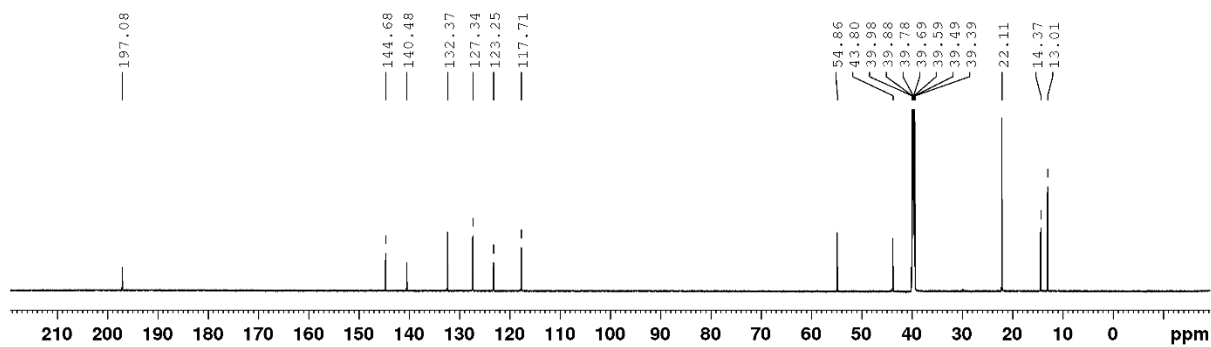

**Figure S21.**  $^1\text{H}$  NMR and  $^{13}\text{C}$  NMR spectra in  $\text{DMSO}-\text{D}_6$  of **11**.

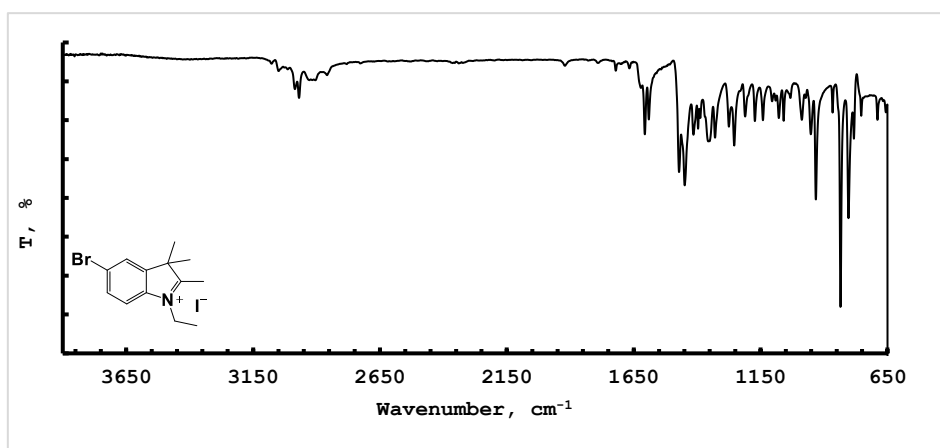

**Figure S22.** FTIR spectrum of **11**.

<sup>1</sup>H-NMR

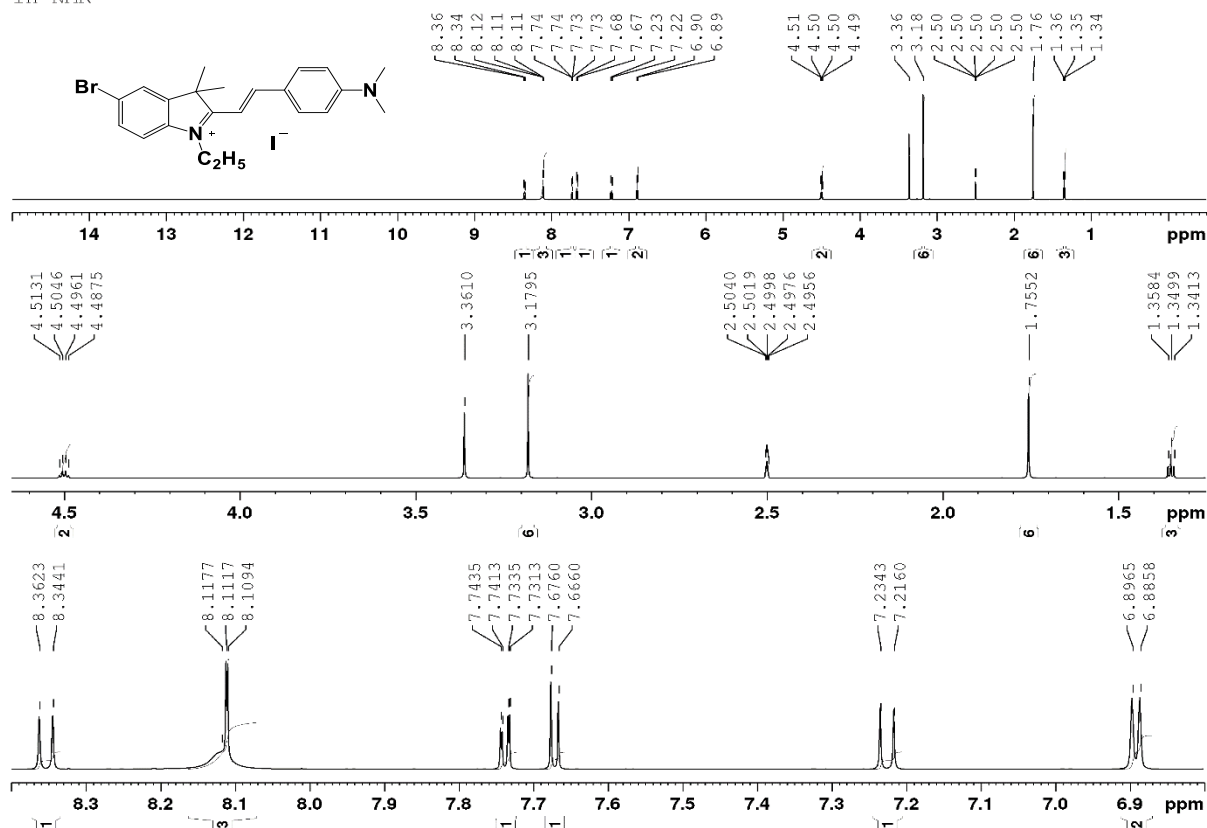

<sup>13</sup>C-NMR

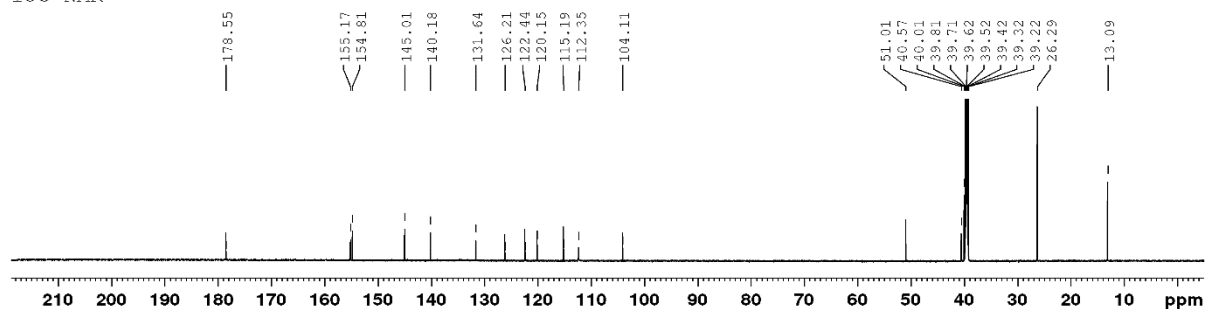

DEPT

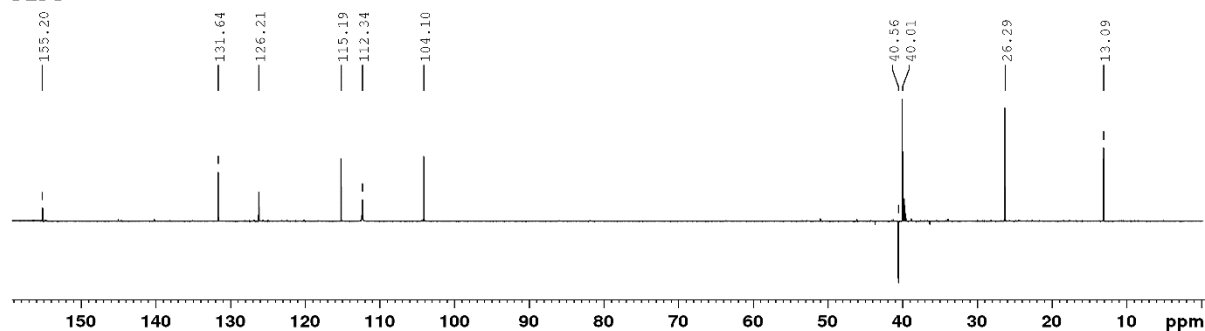

**Figure S23.** <sup>1</sup>H NMR, <sup>13</sup>C NMR and DEPT spectra in DMSO-*D*<sub>6</sub> of **12**.

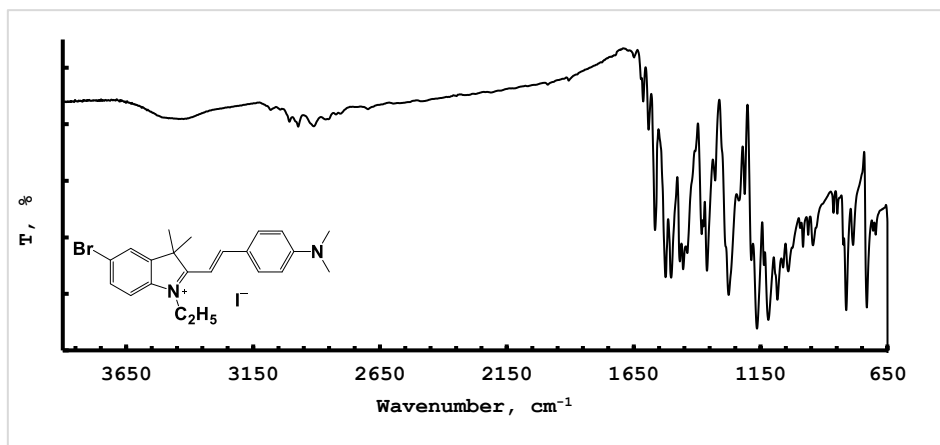

**Figure S24.** FTIR spectrum of **12**.

D:\DATA\FSV2021\11002100519esi+EI-20

02/04/21 13:43:26

EI-20#3-13 RT: 0.01-0.07 AV: 11 SB: 1 0.47 NL: 4.57E8  
T: FTMS + p ESI Fullms [150.0000-2000.0000]

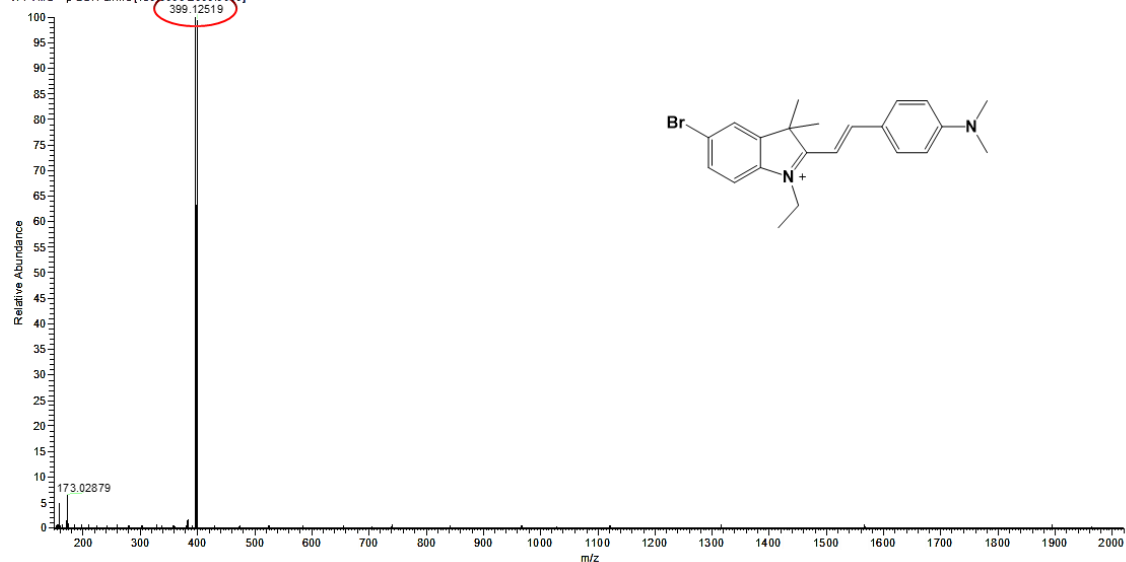

D:\DATA\FSV2021\11002100519esi+EI-20

02/04/21 13:43:26

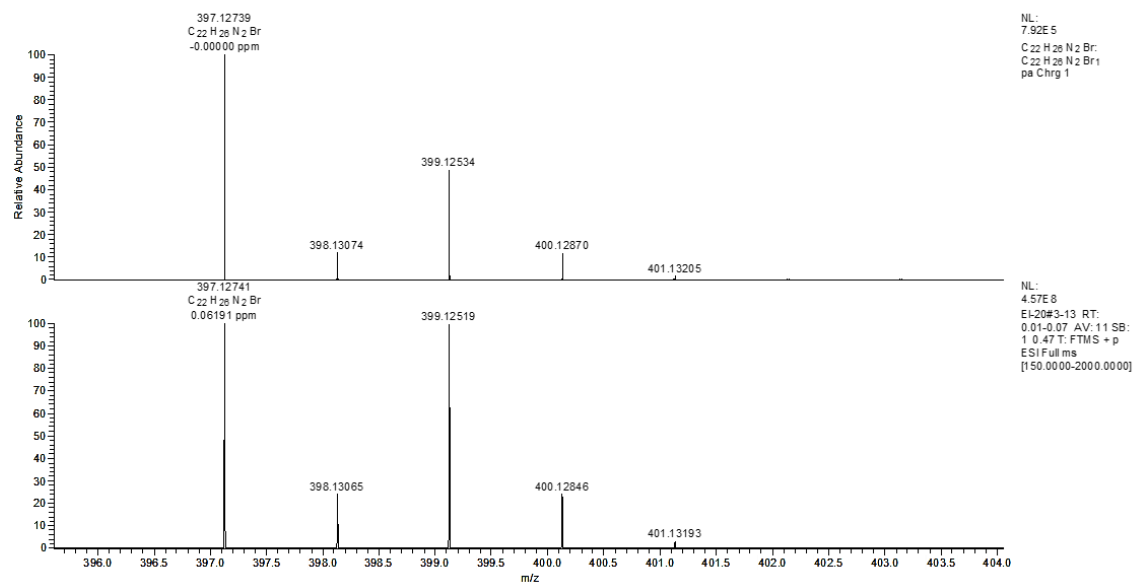

**Figure S25.** Mass spectrum of **12**.

<sup>1</sup>H-NMR

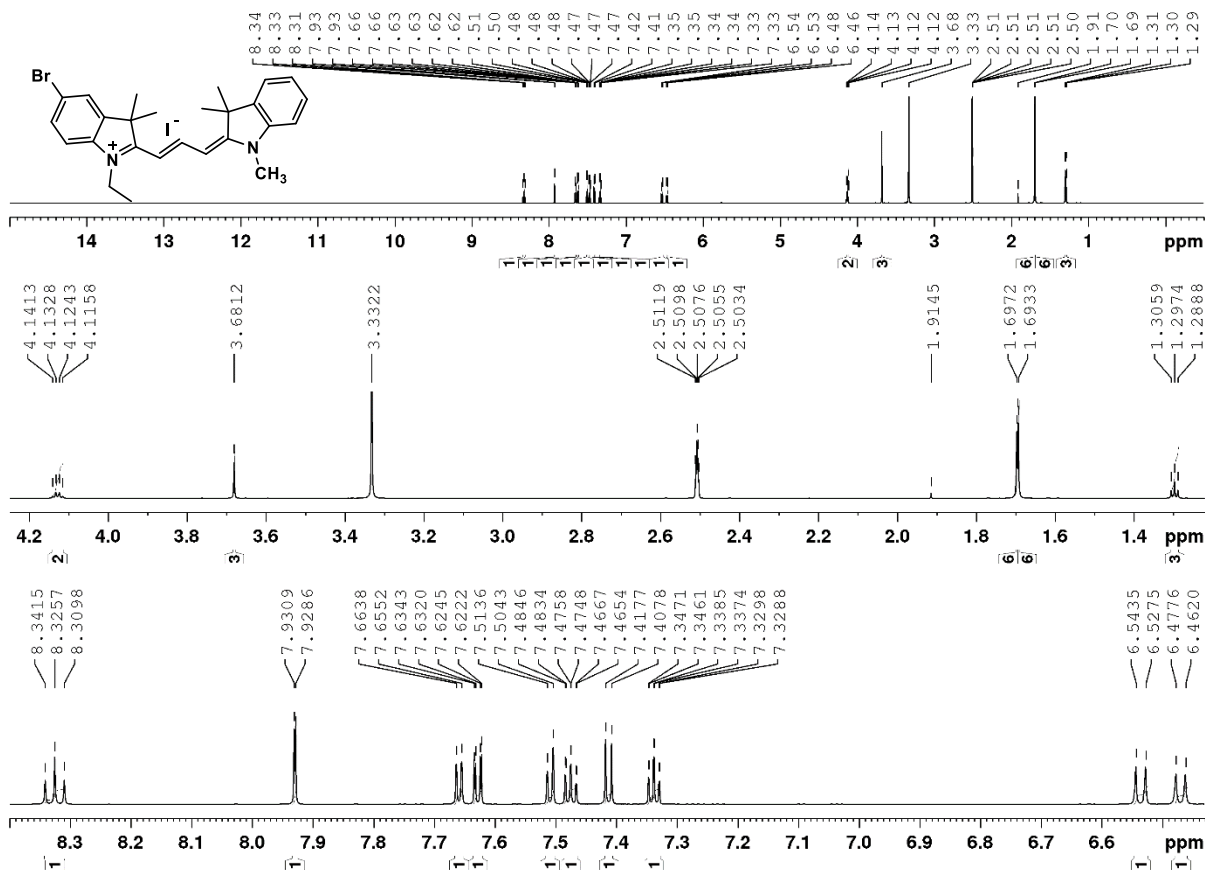

<sup>13</sup>C-NMR

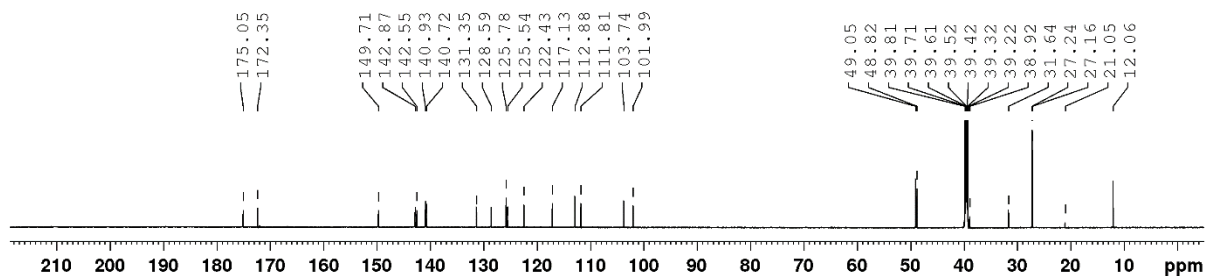

DEPT

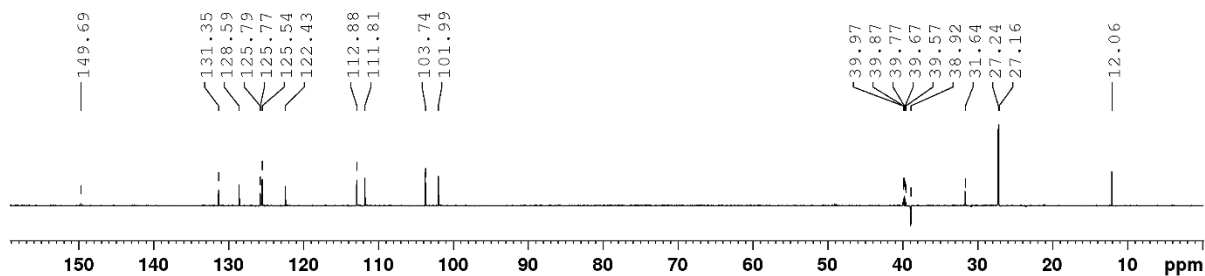

Figure S26. <sup>1</sup>H NMR, <sup>13</sup>C NMR and DEPT spectra in DMSO-D<sub>6</sub> of 13.

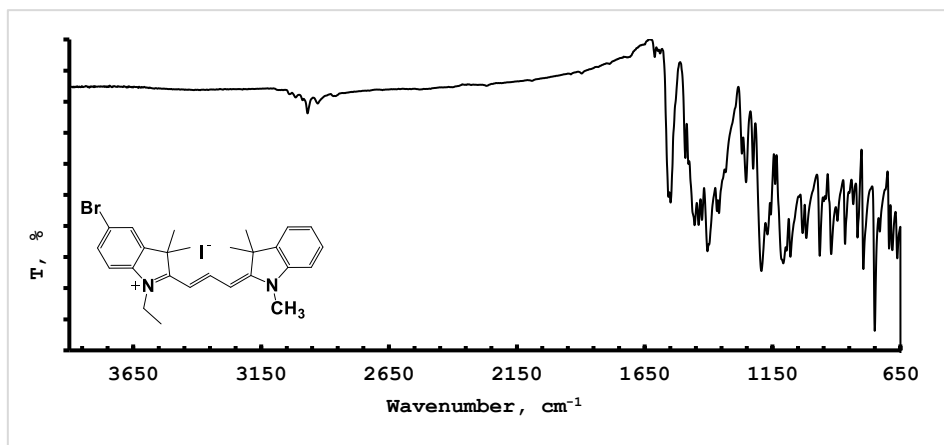

**Figure S27.** FTIR spectrum of **13**.

D:\DATA\FS\202111002100519\esi+VEI-30

02/04/21 13:49:53

EL30#3-7 RT: 0.01-0.04 AV: 5 SB: 1.005 NL: 5.28E8

T: FTMS + p ESI Full ms [150.0000-2000.0000]

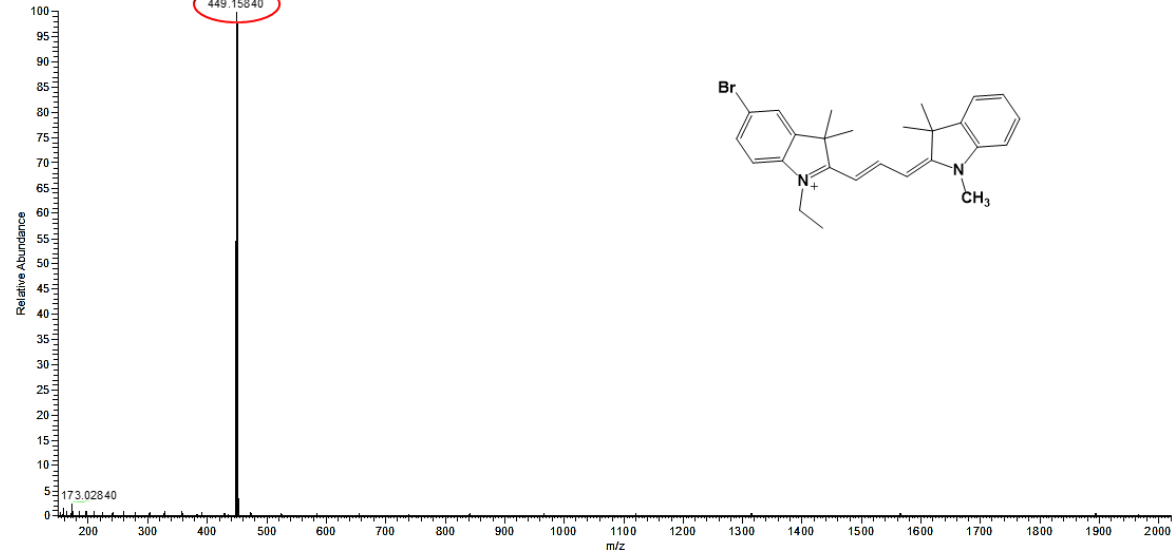

D:\DATA\FS\202111002100519\esi+VEI-30

02/04/21 13:49:53

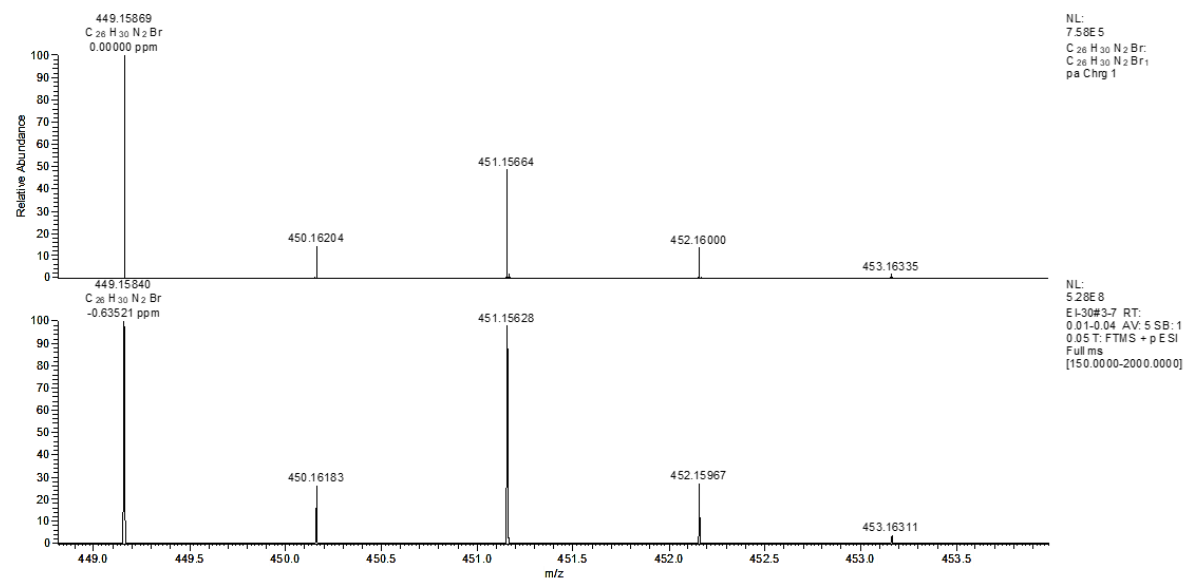

**Figure S28.** Mass spectrum of **13**.



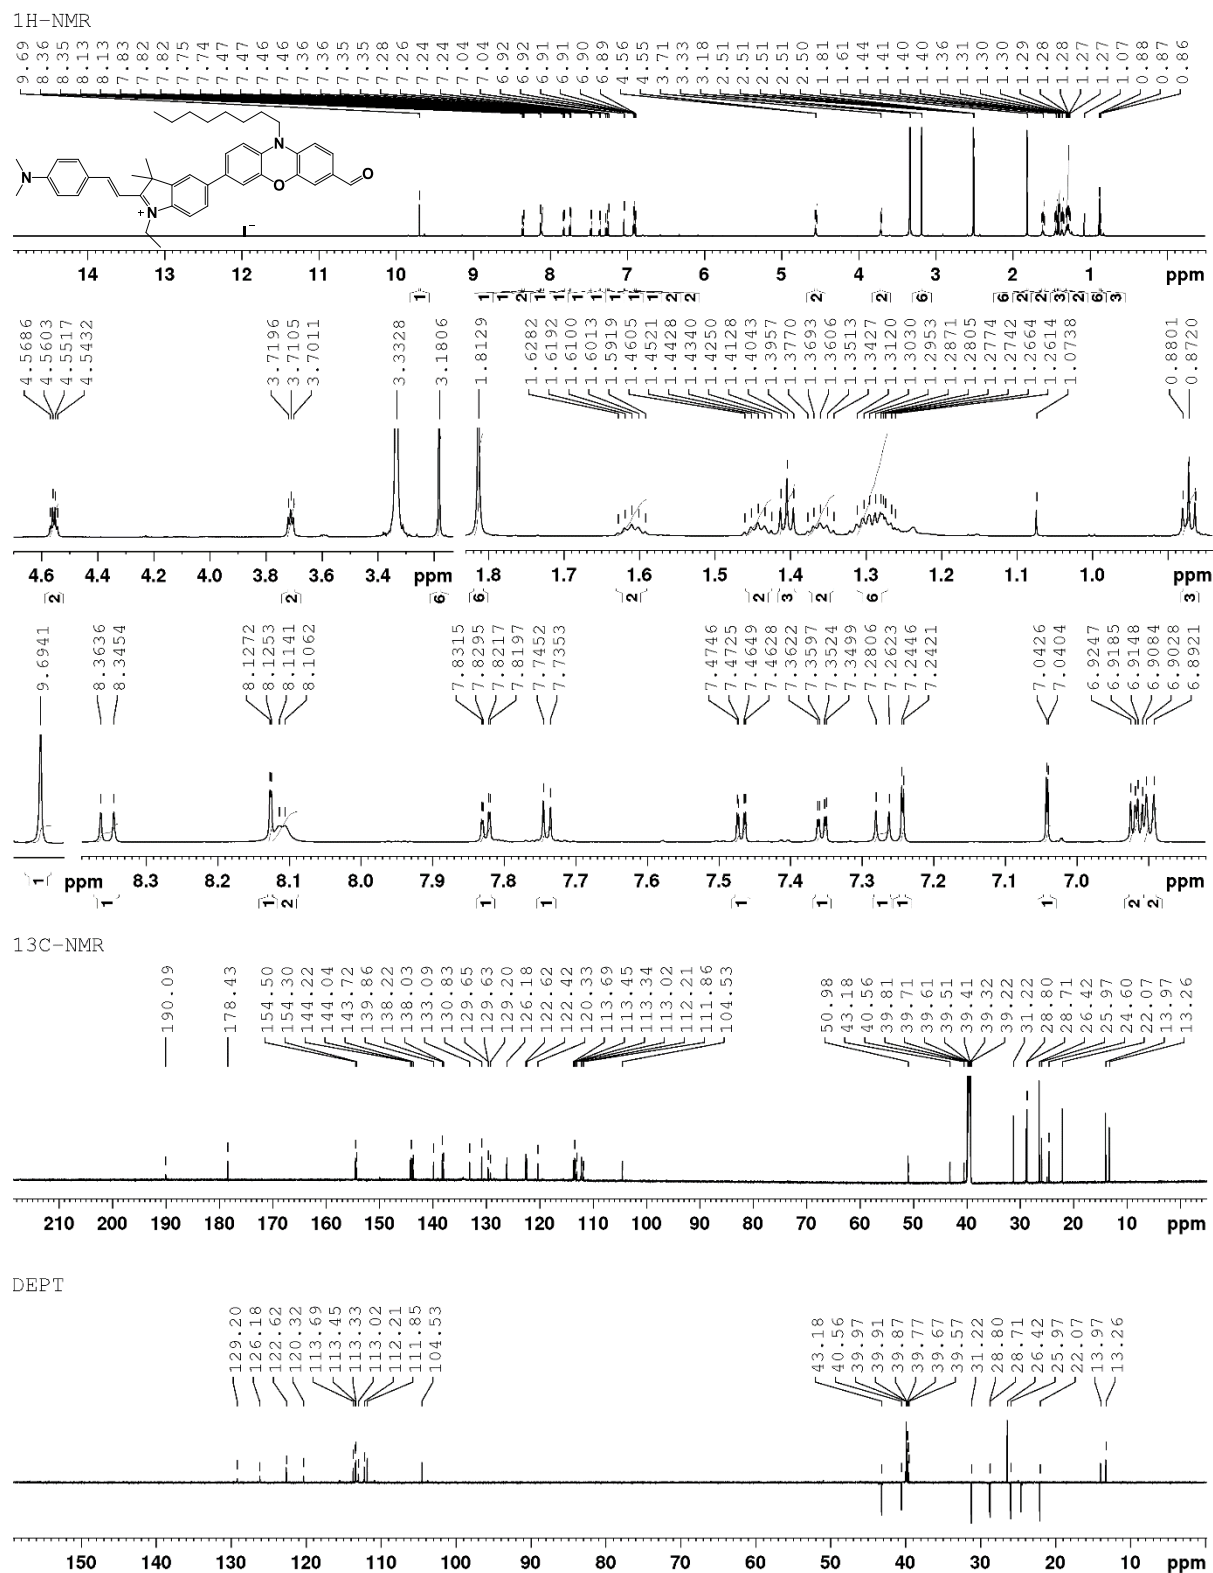

**Figure S29.** <sup>1</sup>H NMR, <sup>13</sup>C NMR and DEPT spectra in DMSO-D<sub>6</sub> of **14**.

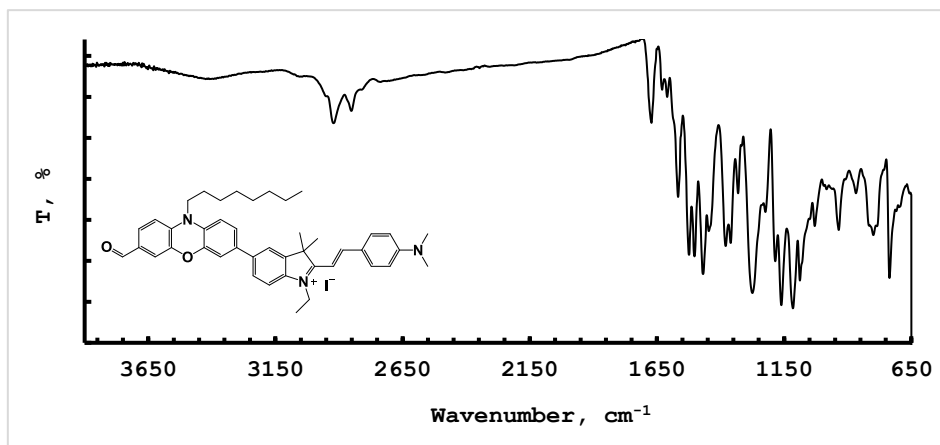

**Figure S30.** FTIR spectrum of **14**.

D:\DATA\FS\2021\11002100519\esi+EI-21

02/07/21 11:00:02

EI-21#5-17 RT: 0.03-0.10 AV: 13 SB: 1 0.38 NL: 8.28E8  
T: FTMS + p ESI Full ms [150.0000-2000.0000]

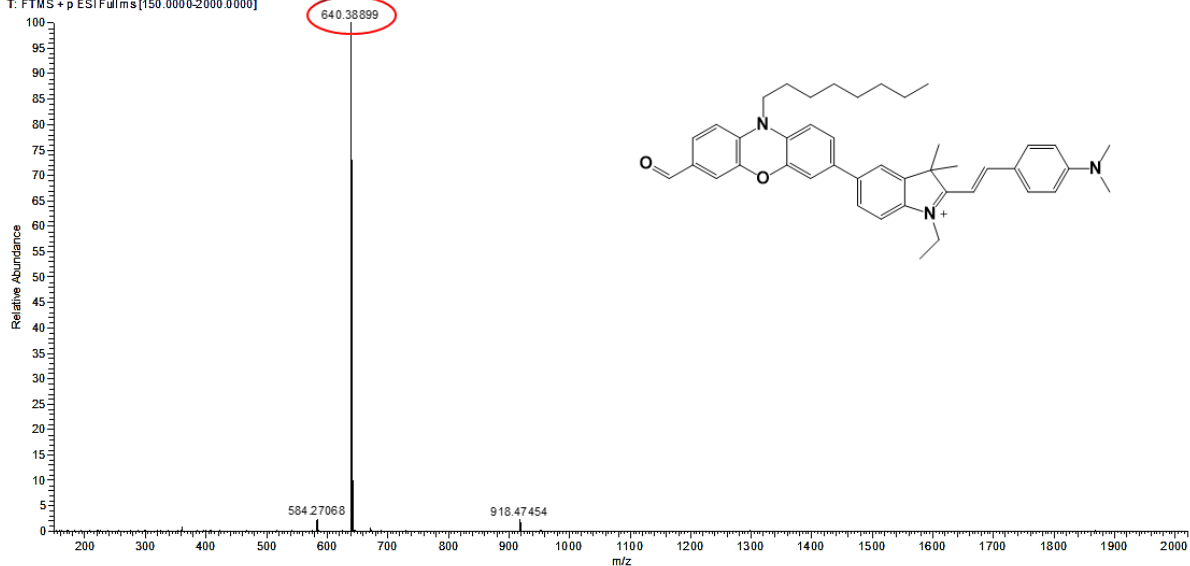

D:\DATA\FS\2021\11002100519\esi+EI-21

02/07/21 11:00:02

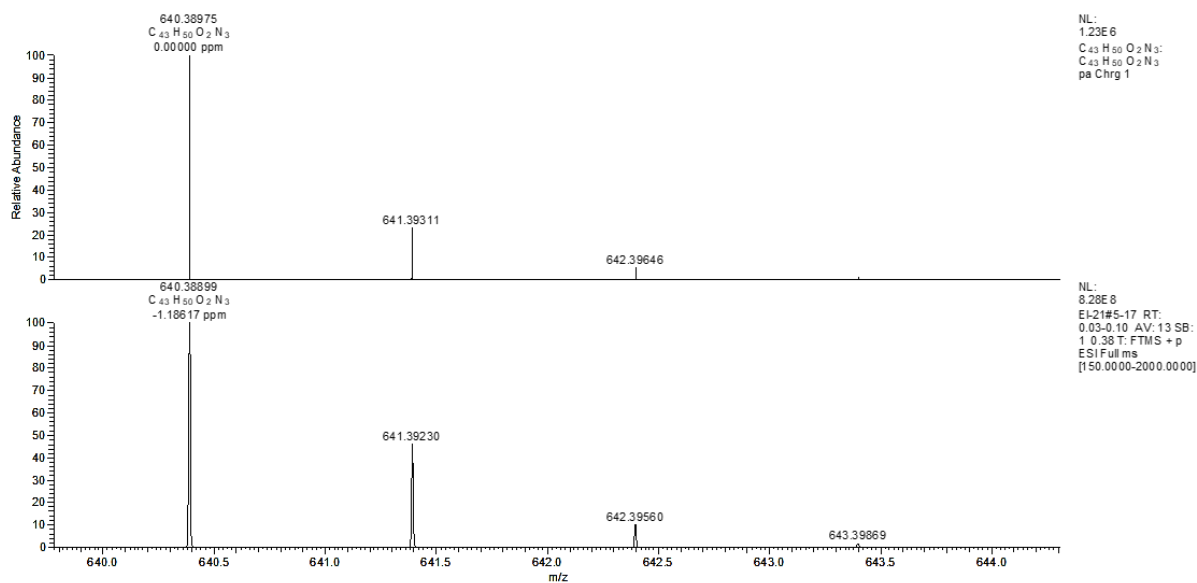

**Figure S31.** Mass spectrum of **14**.

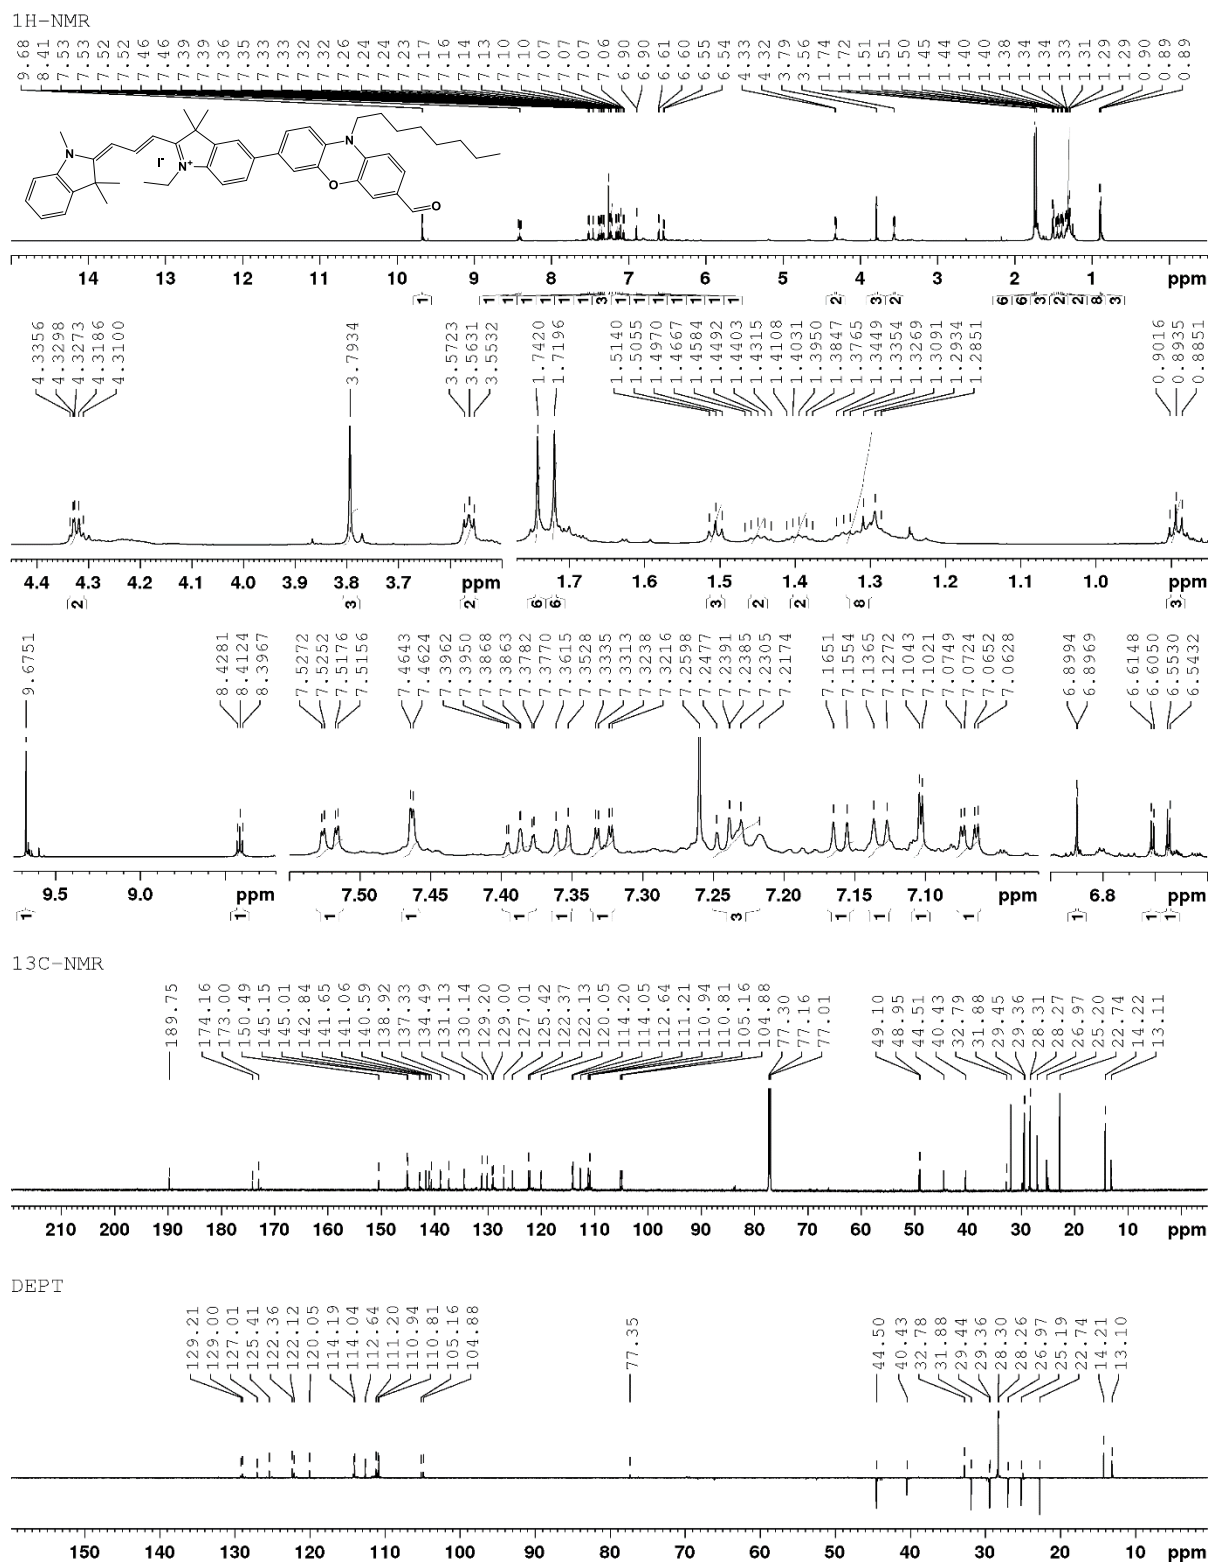

**Figure S32.** <sup>1</sup>H NMR, <sup>13</sup>C NMR and DEPT spectra in DMSO-D<sub>6</sub> of **15a**.

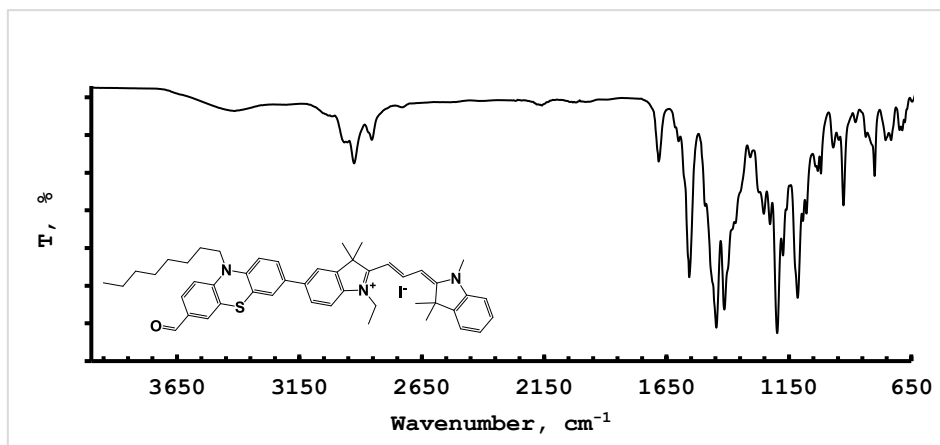

Figure S33. FTIR spectrum of 15a.

D:\DATA\FS\202111002100519\esi+IEI-36

02/07/21 11:17:39

EI-36#3-24 RT: 0.01-0.14 AV: 22 SB: 1 0.57 NL: 1.59E8  
T: FTMS + p ESI Full ms [150.0000-2000.0000]

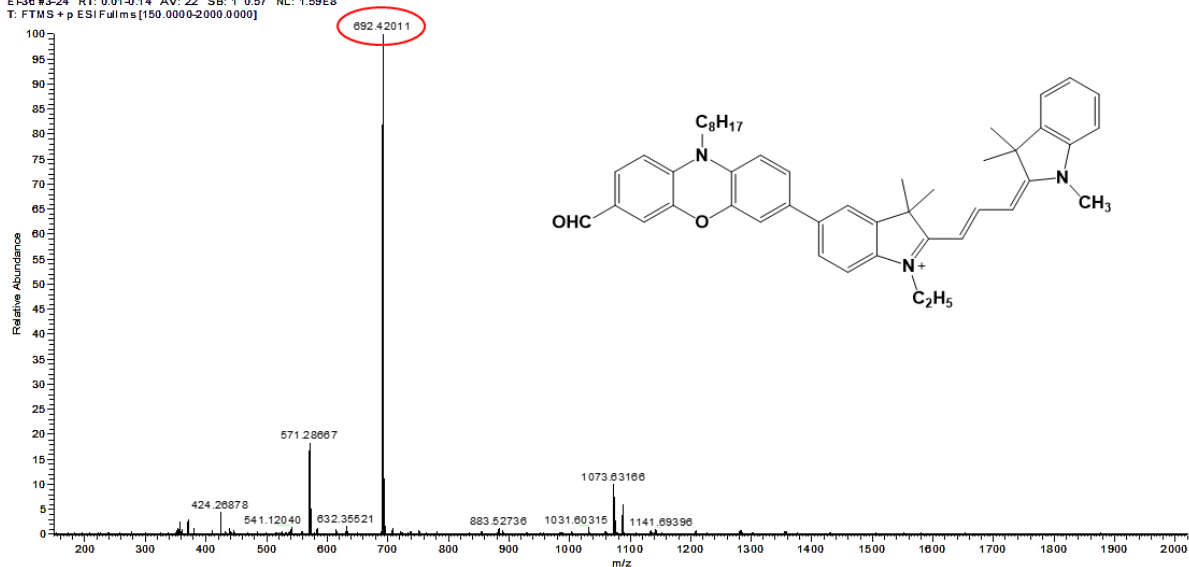

D:\DATA\FS\202111002100519\esi+IEI-36

02/07/21 11:17:39

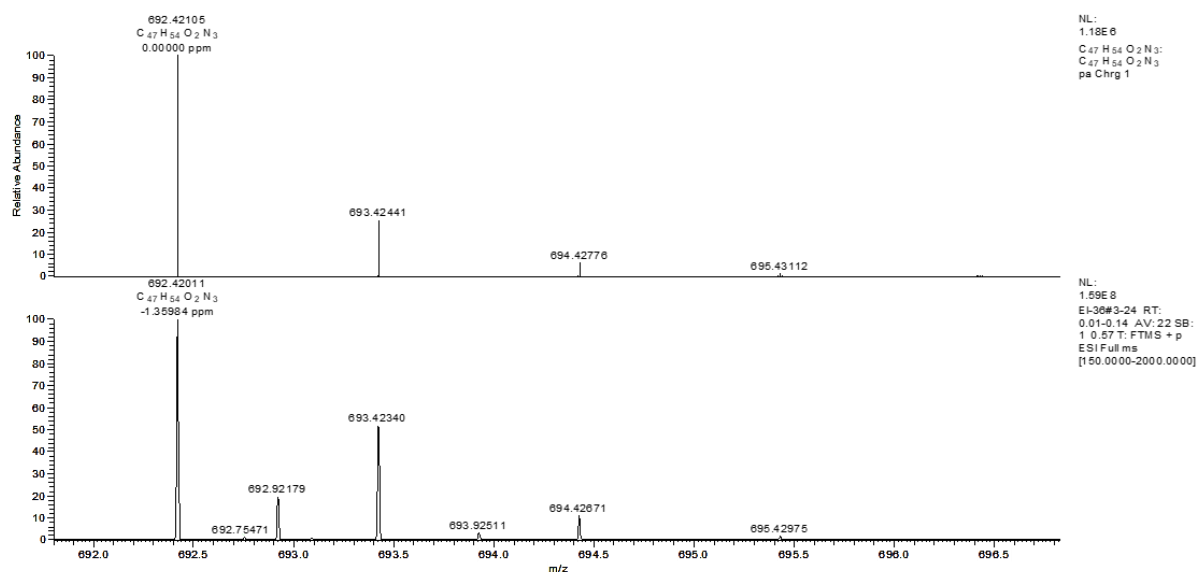

Figure S34. Mass spectrum of 15a.

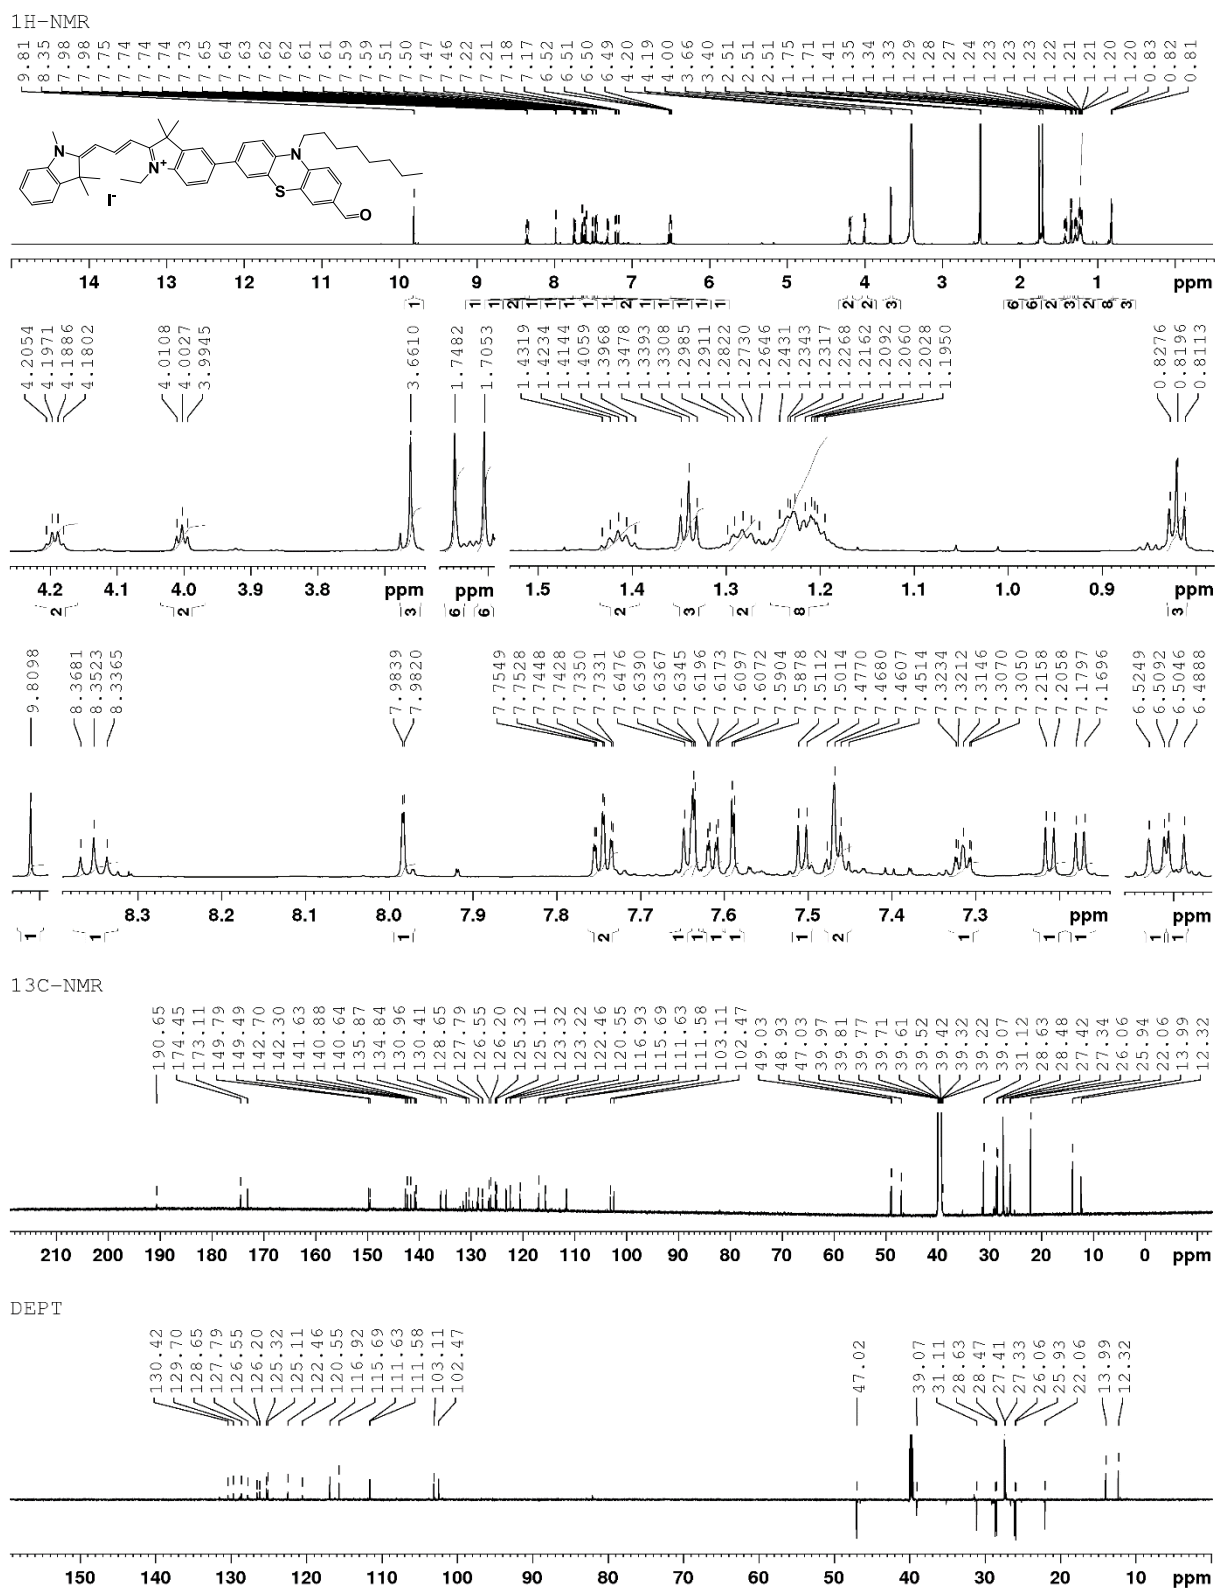

**Figure S35.** <sup>1</sup>H NMR, <sup>13</sup>C NMR and DEPT spectra in DMSO-D<sub>6</sub> of **15b**.

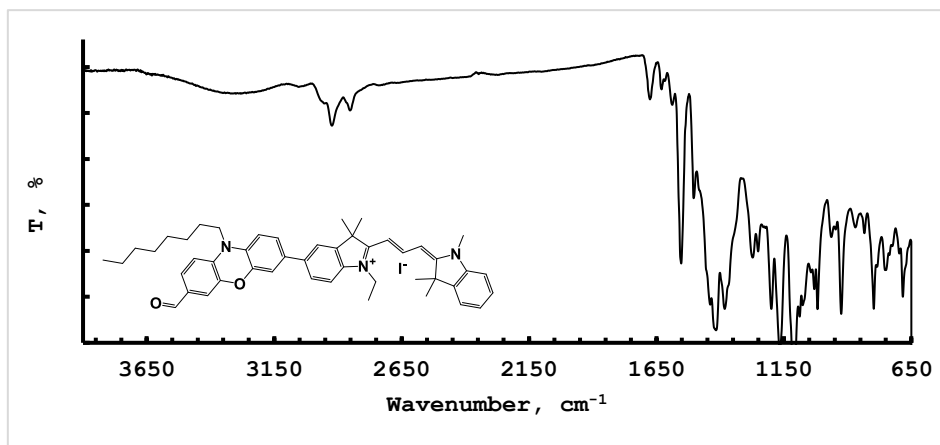

**Figure S36.** FTIR spectrum of **15b**.

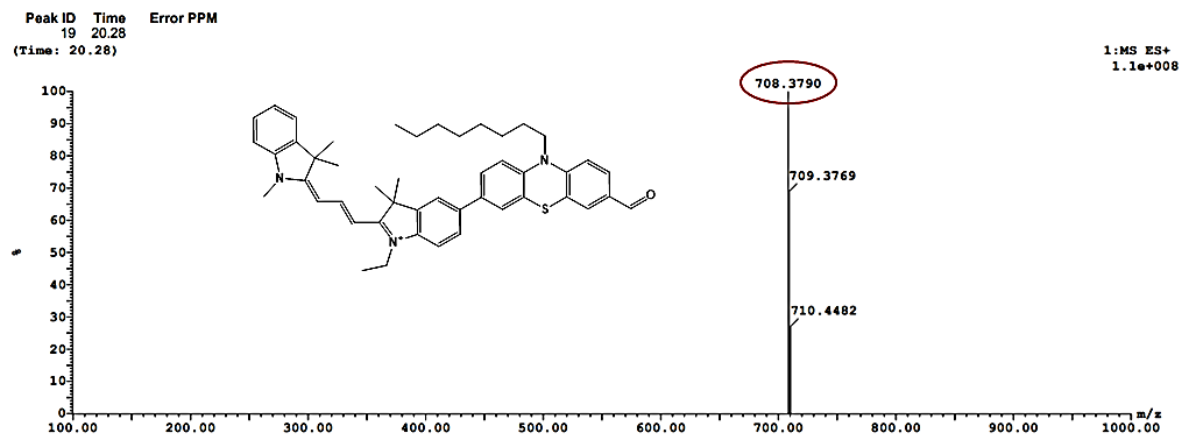

**Figure S37.** Mass spectrum of **15b**.



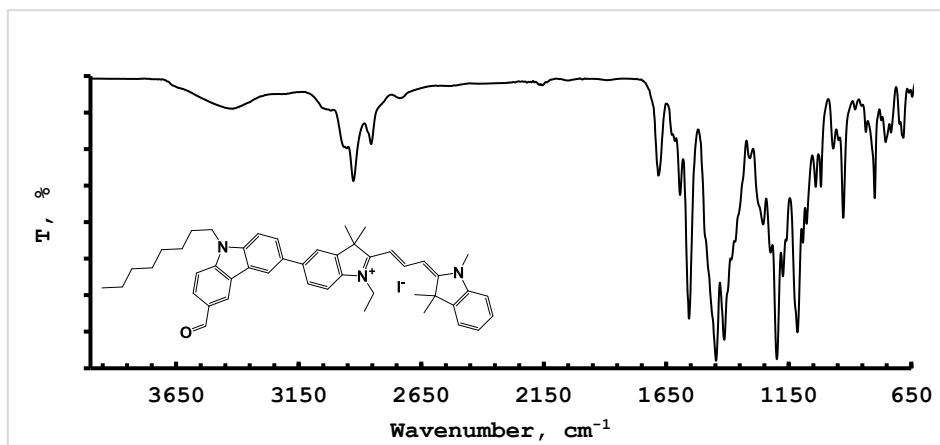

**Figure S39.** FTIR spectrum of **15c**.

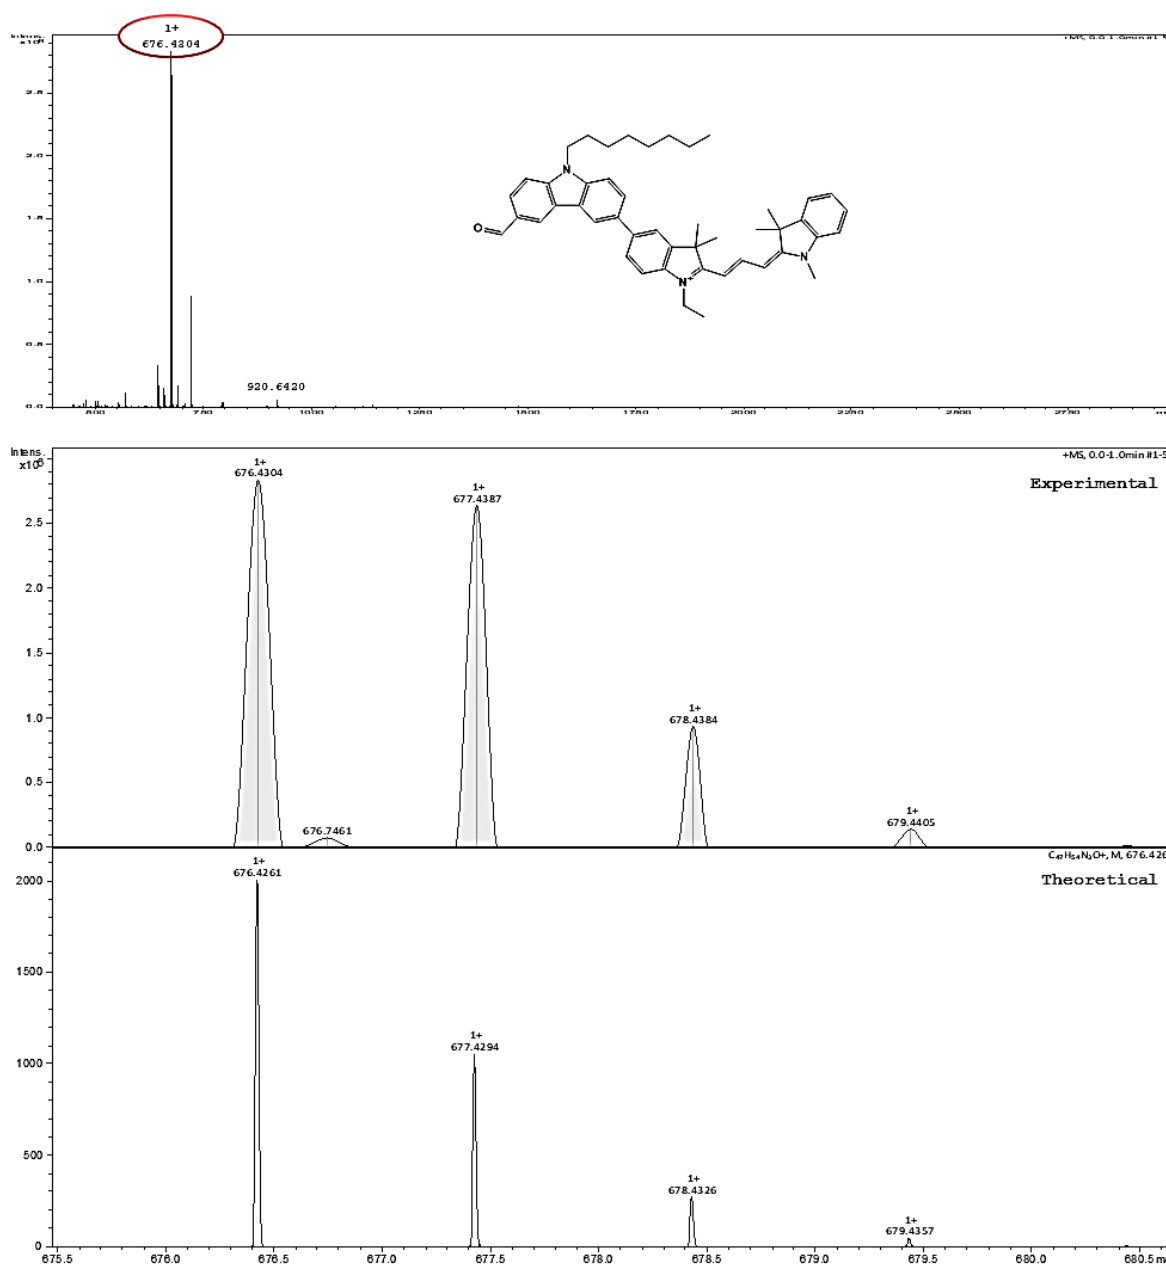

**Figure S40.** Mass spectrum of **15c**.





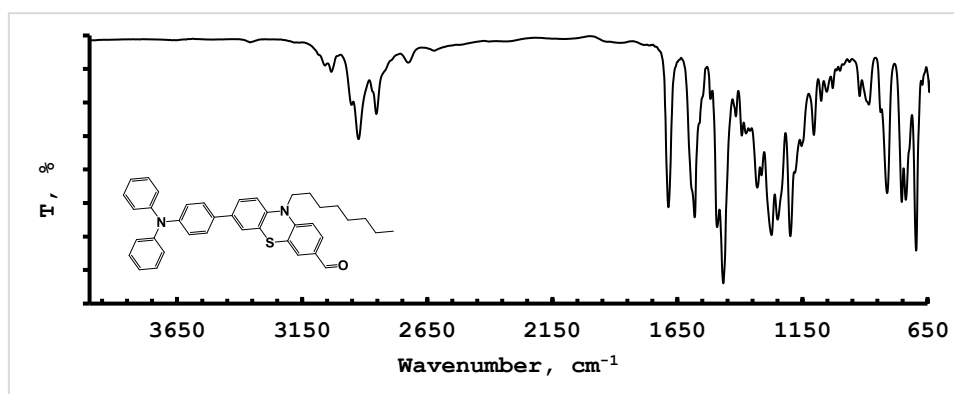

**Figure S42.** FTIR spectrum of **16**.

Benzo[c][1,2,5]thiadiazole  
CDCl<sub>3</sub>  
1H-NMR, 600 MHz

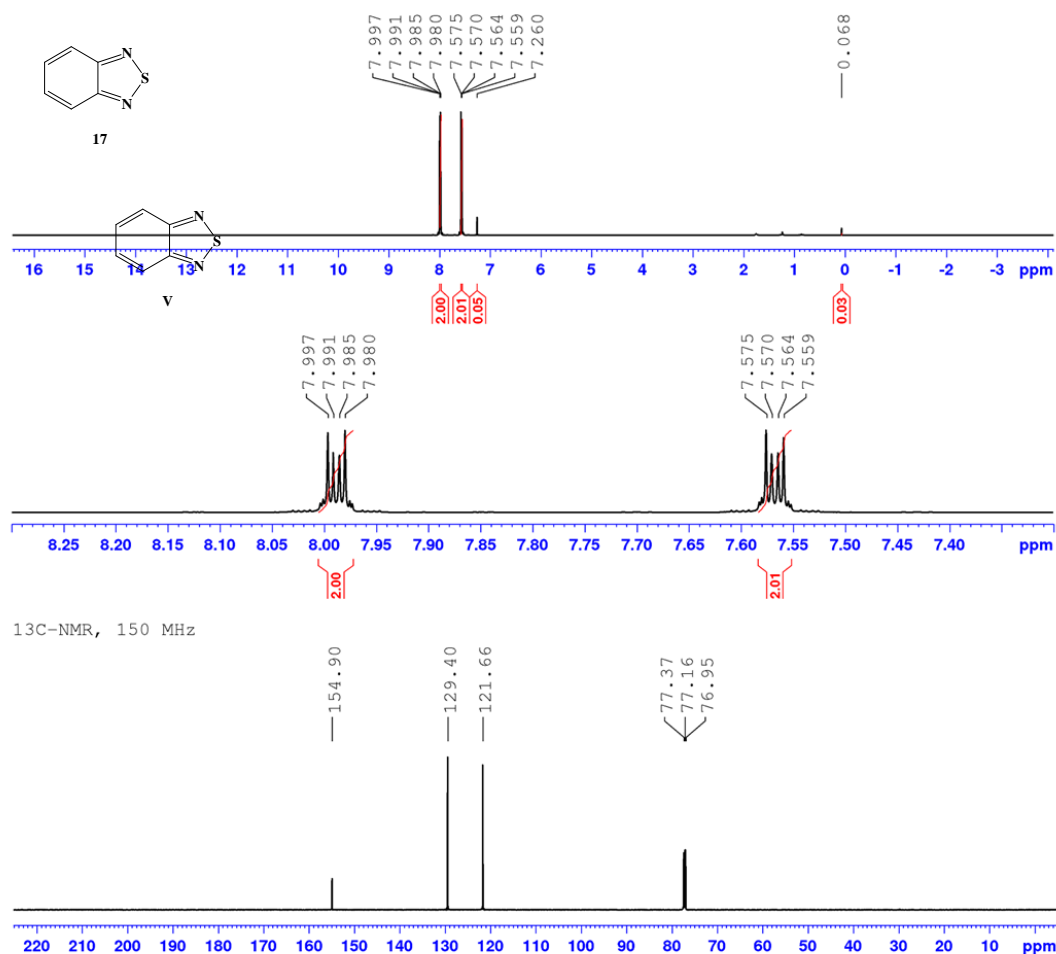

**Figure S44.** <sup>1</sup>H-NMR and <sup>13</sup>C-NMR spectra in CDCl<sub>3</sub> of **17**.

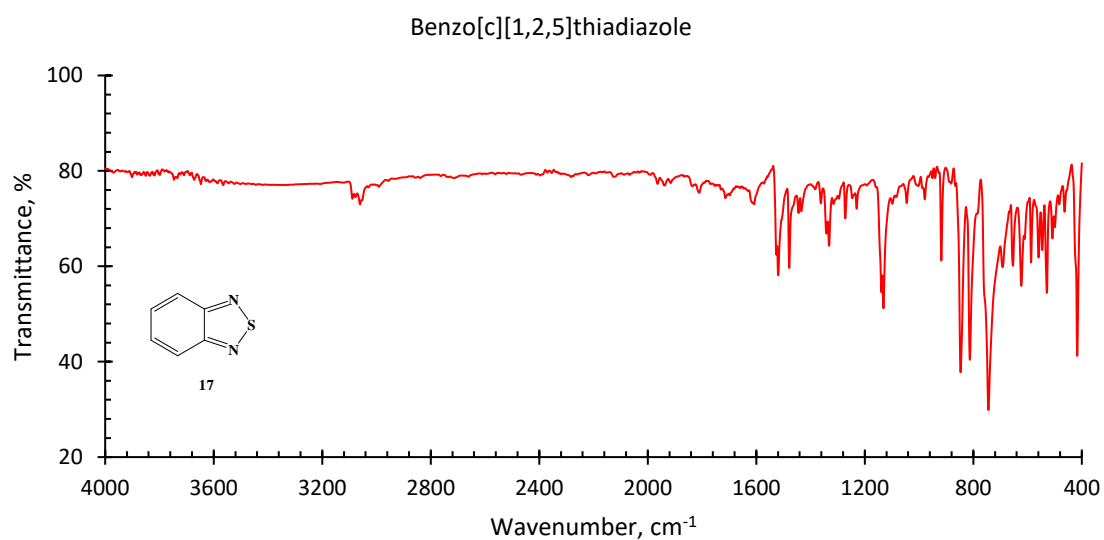

**Figure S45.** FTIR spectrum of **17**.

4,7-Dibromobenzo[c][1,2,5]thiadiazole  
CDCl<sub>3</sub>  
1H-NMR, 850 MHz

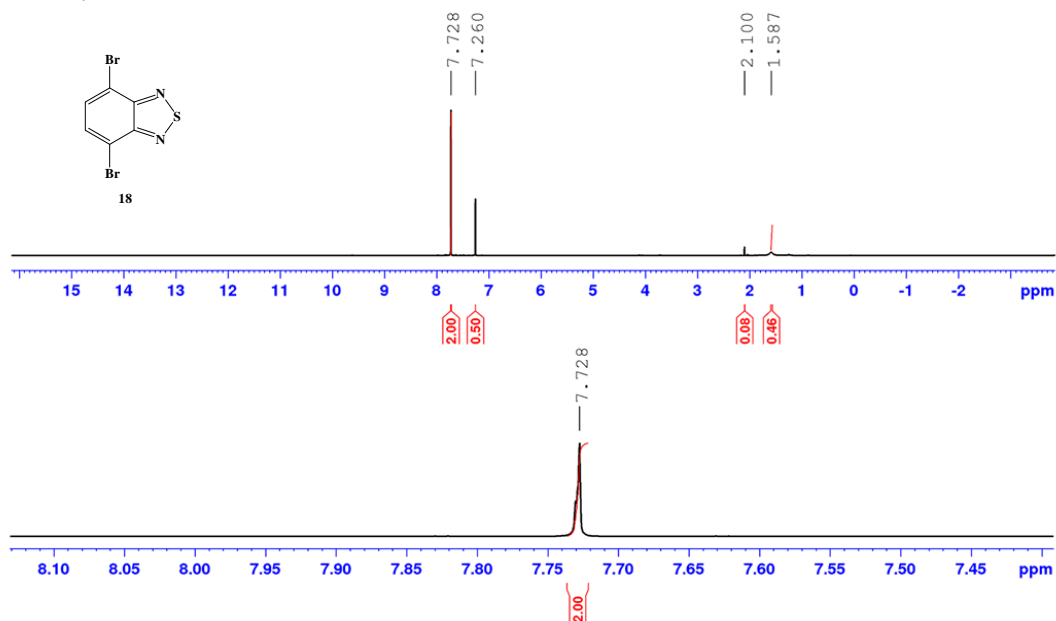

<sup>13</sup>C-NMR, 213 MHz

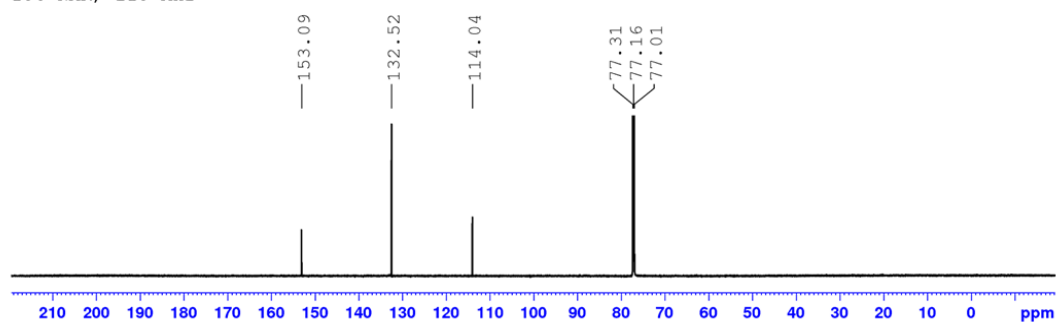

**Figure S46.** <sup>1</sup>H-NMR and <sup>13</sup>C-NMR spectra in CDCl<sub>3</sub> of **18**.

4,7-Dibromobenzo[c][1,2,5]thiadiazole

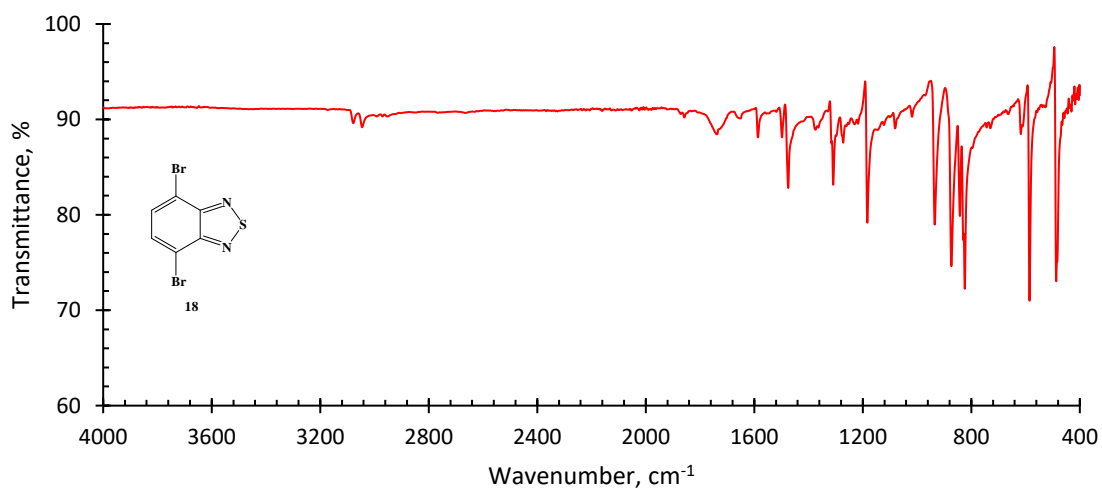

**Figure S47.** FTIR spectrum of **18**.

3,6-Dibromobenzene-1,2-diamine  
CDCl<sub>3</sub>  
1H-NMR, 600 MHz

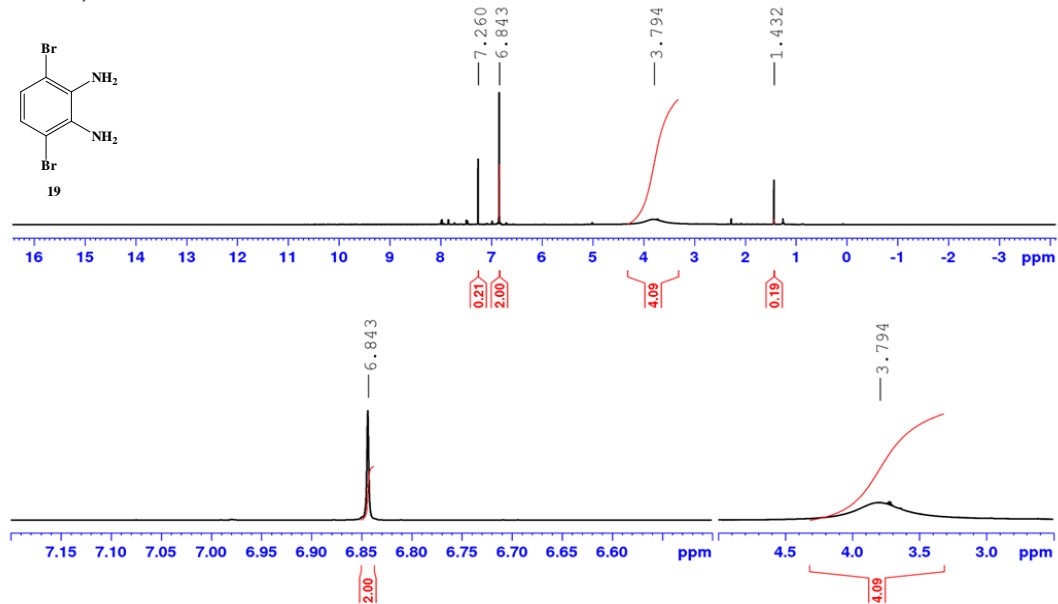

13C-NMR, 213 MHz

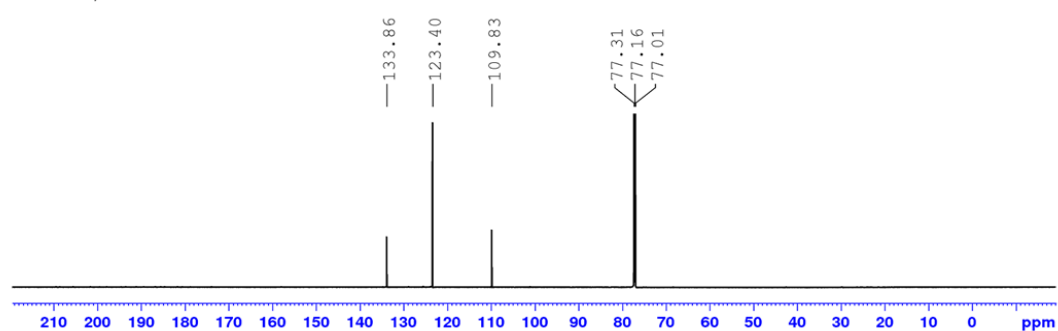

**Figure S48.** <sup>1</sup>H-NMR and <sup>13</sup>C-NMR spectra in CDCl<sub>3</sub> of **19**.

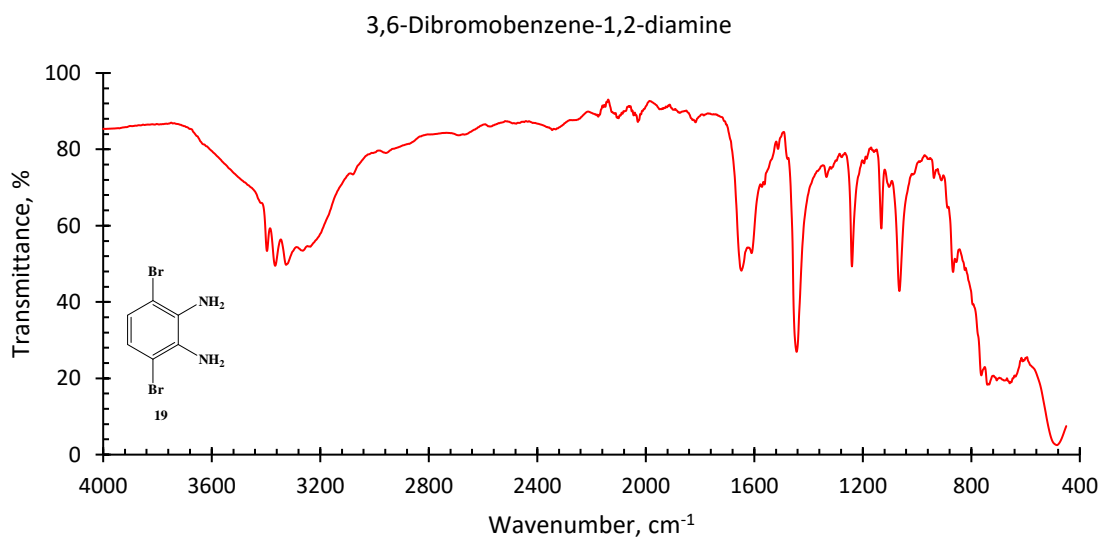

**Figure S49.** FTIR spectrum of **19**.

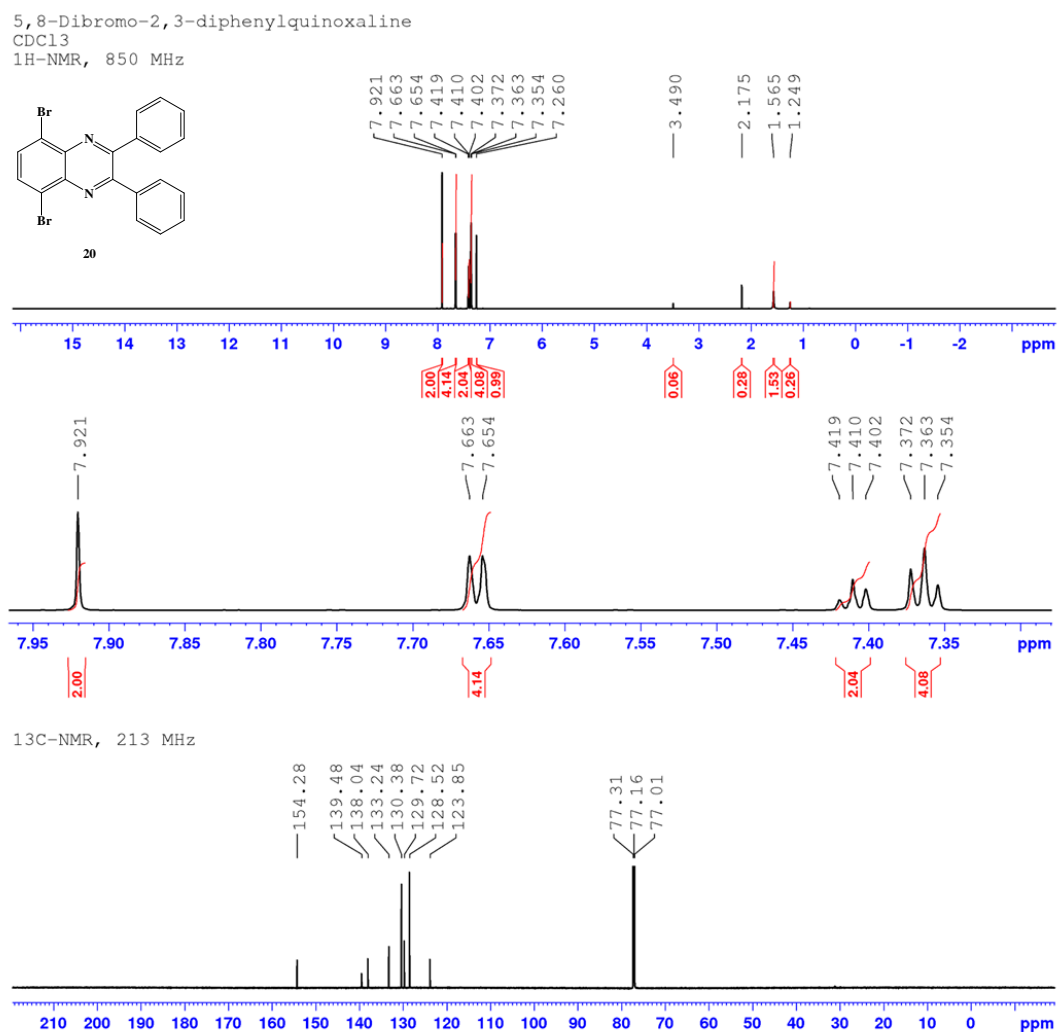

**Figure S50.** <sup>1</sup>H-NMR and <sup>13</sup>C-NMR spectra in CDCl<sub>3</sub> of **20**.

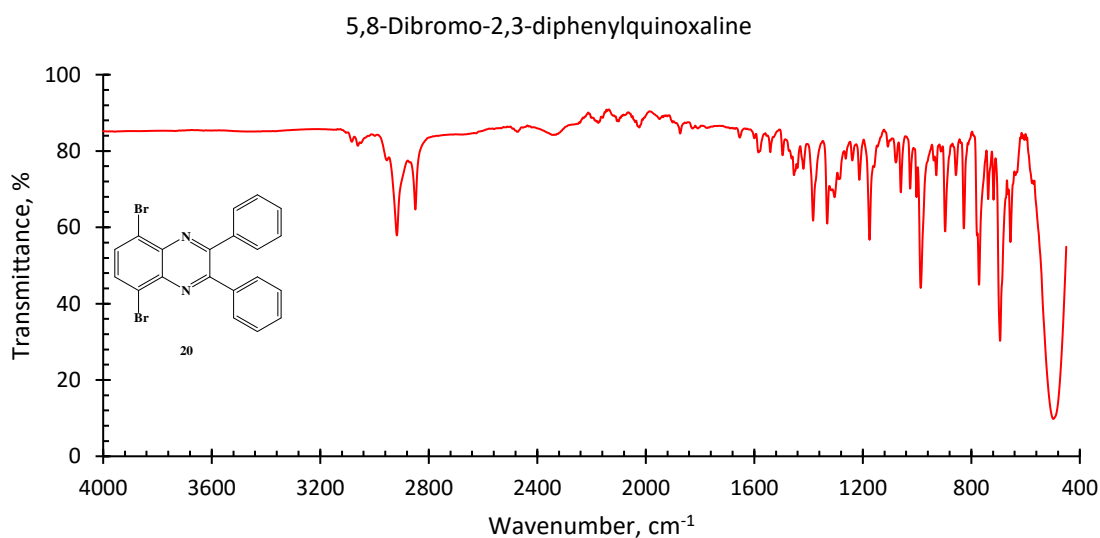

**Figure S51.** FTIR spectrum of **20**.

2,3-Diphenyl-5,8-di(thiophen-2-yl)quinoxaline  
 CDCl<sub>3</sub>  
 1H-NMR, 850 MHz

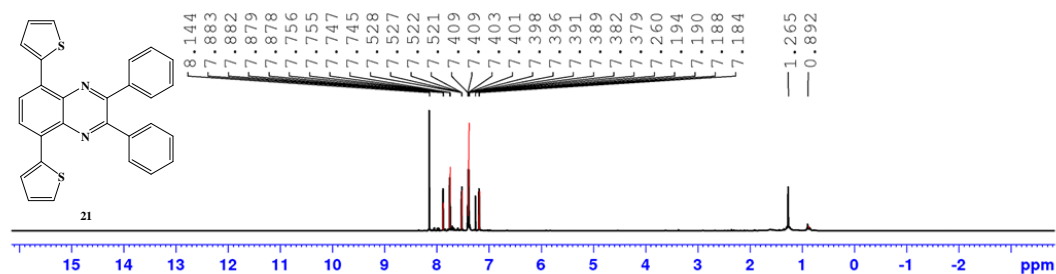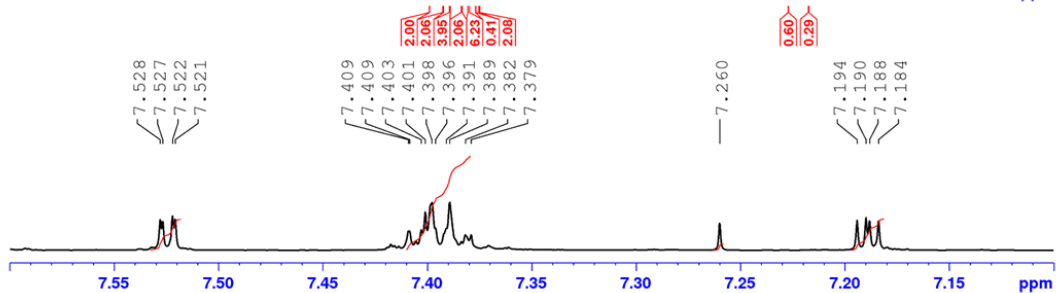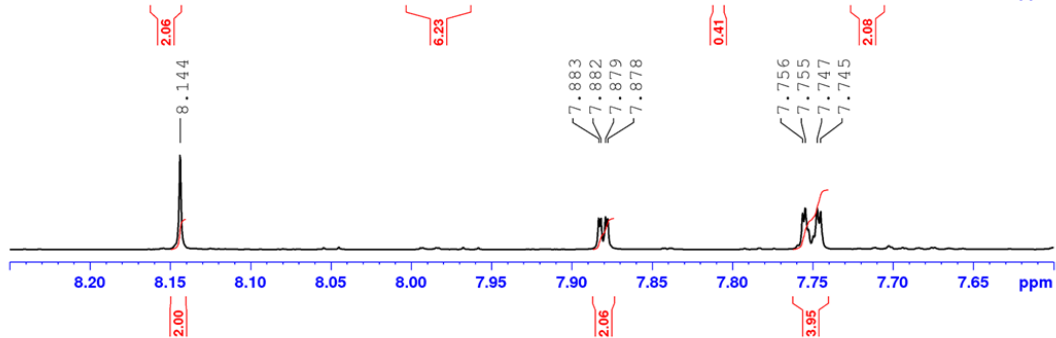

<sup>13</sup>C-NMR, 213 MHz

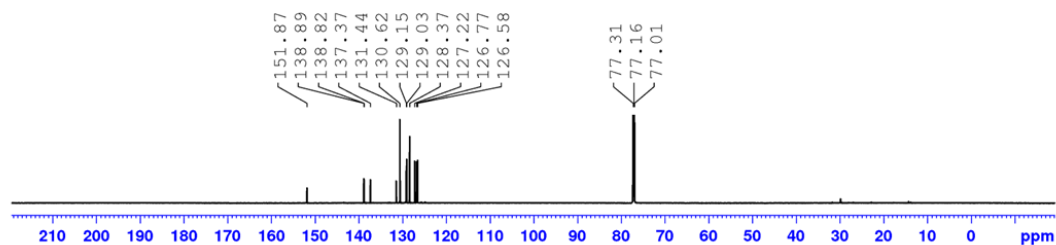

DEPT-135, 213 MHz

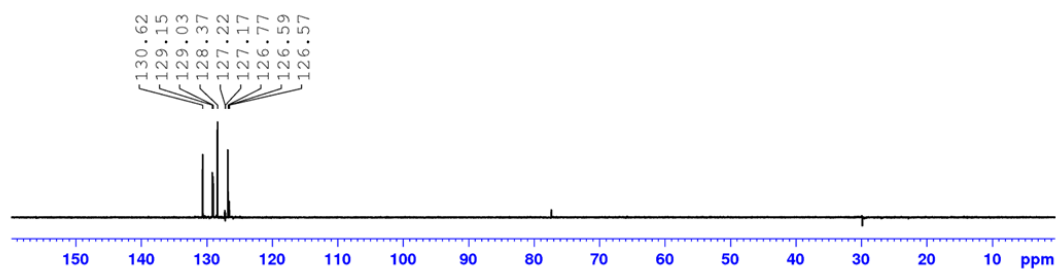

**Figure S52.** <sup>1</sup>H-NMR, <sup>13</sup>C-NMR and DEPT-135 spectra in CDCl<sub>3</sub> of **21**.

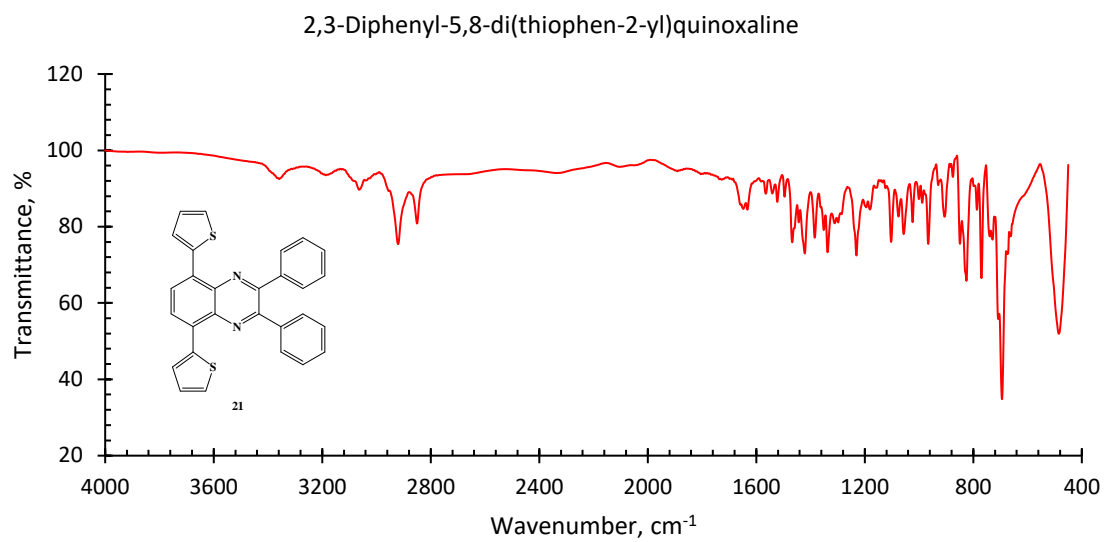

**Figure S53.** FTIR spectrum of **21**.



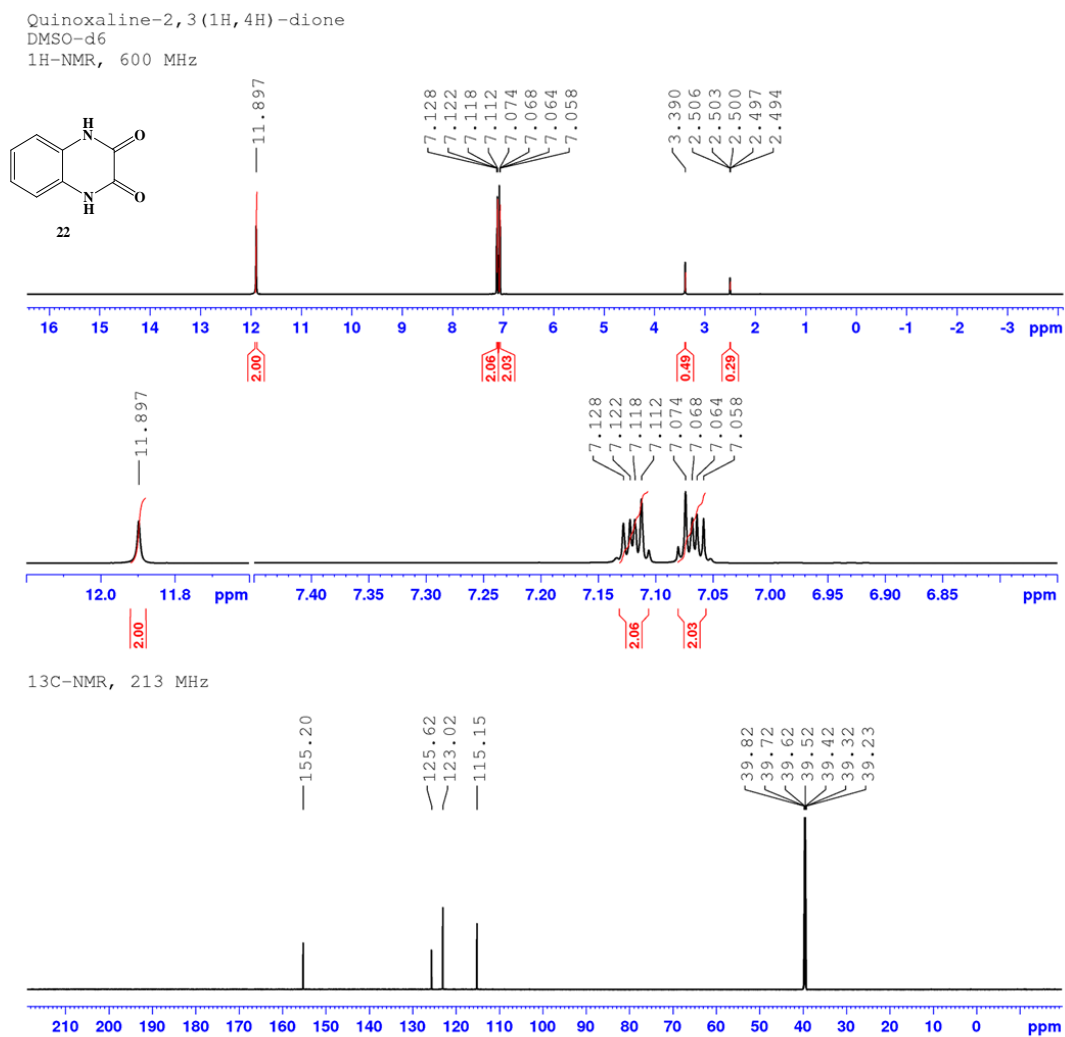

**Figure S54.** <sup>1</sup>H-NMR and <sup>13</sup>C-NMR spectra in DMSO-*d*<sub>6</sub> of **22**.

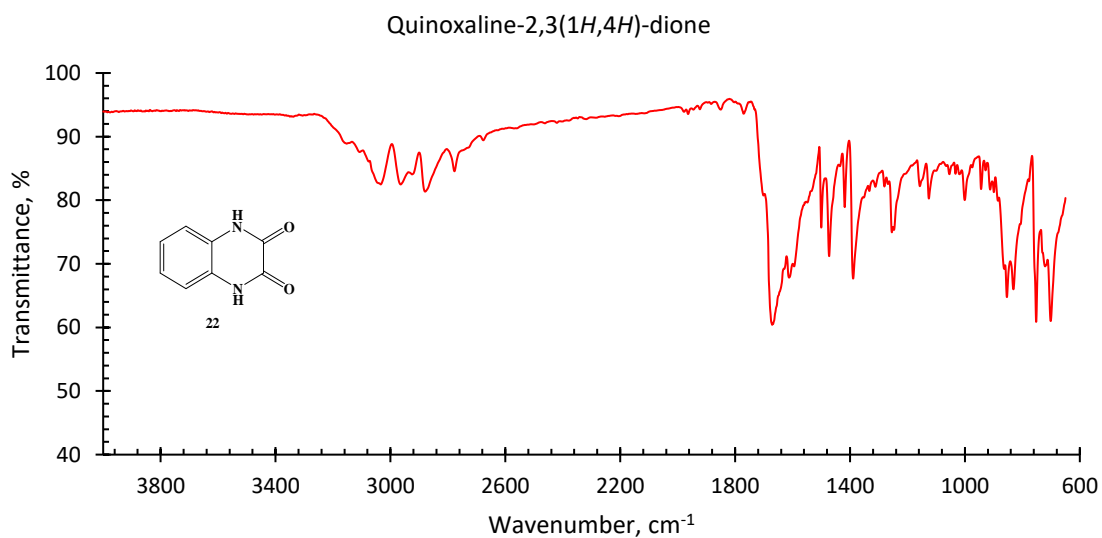

**Figure S55.** FTIR spectrum of **22**.

2,3-Dichloroquinoxaline  
CDCl<sub>3</sub>  
1H-NMR, 600 MHz

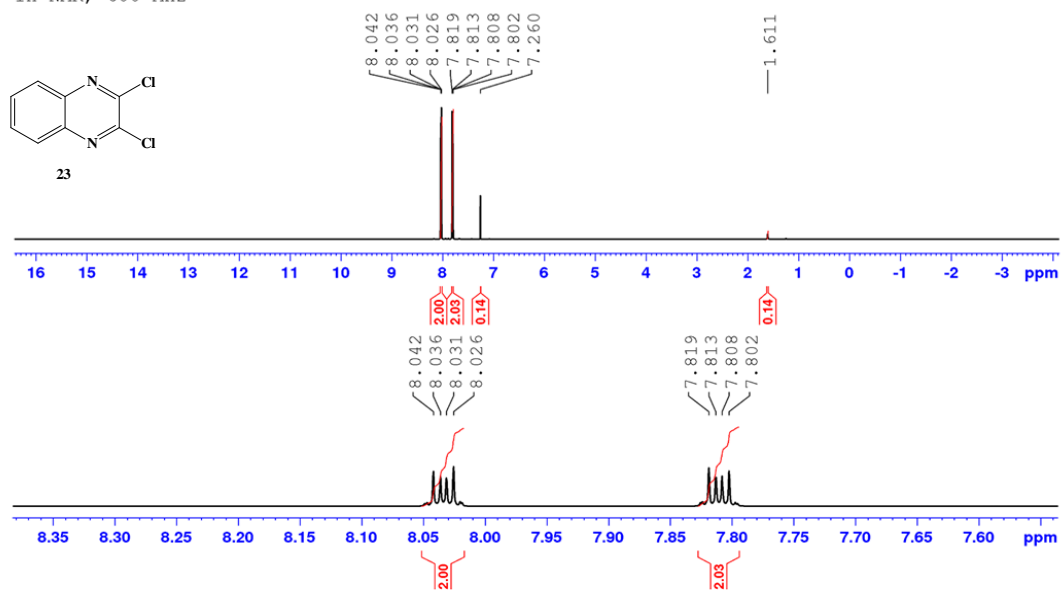

13C-NMR, 213 MHz

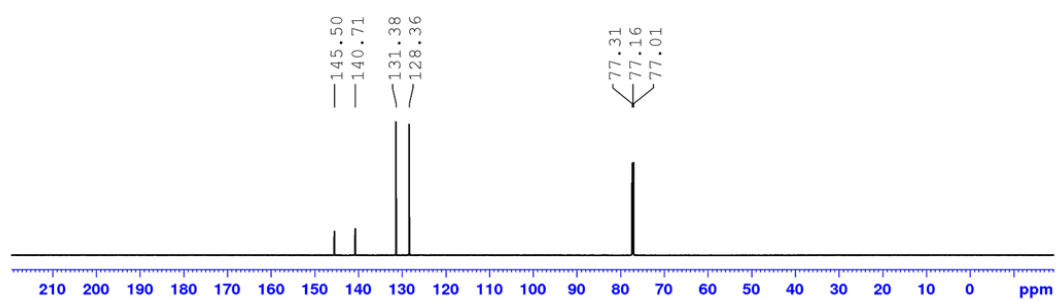

**Figure S56.** <sup>1</sup>H-NMR and <sup>13</sup>C-NMR spectra in CDCl<sub>3</sub> of **23**.

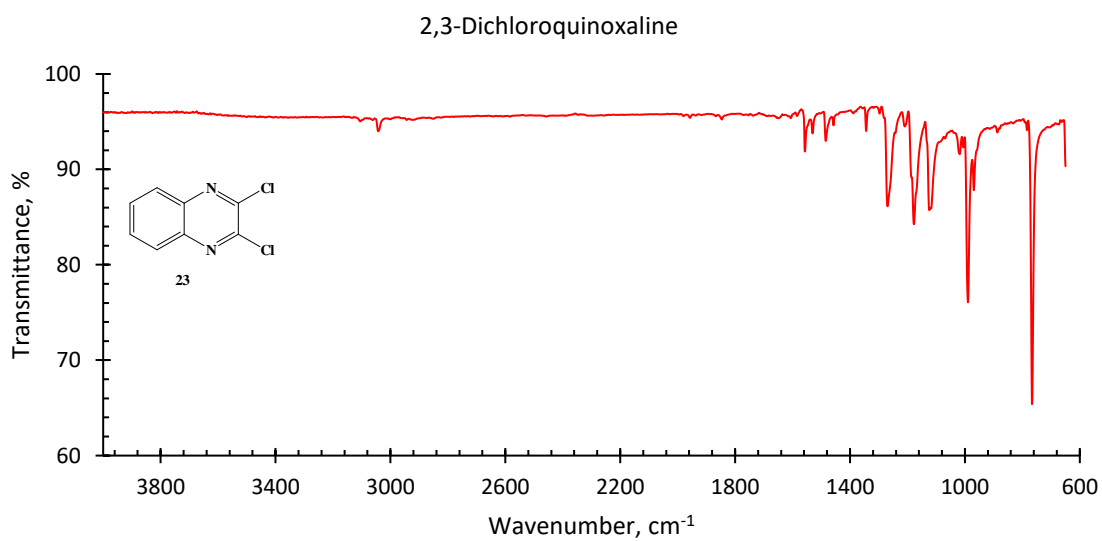

**Figure S57.** FTIR spectrum of **23**.

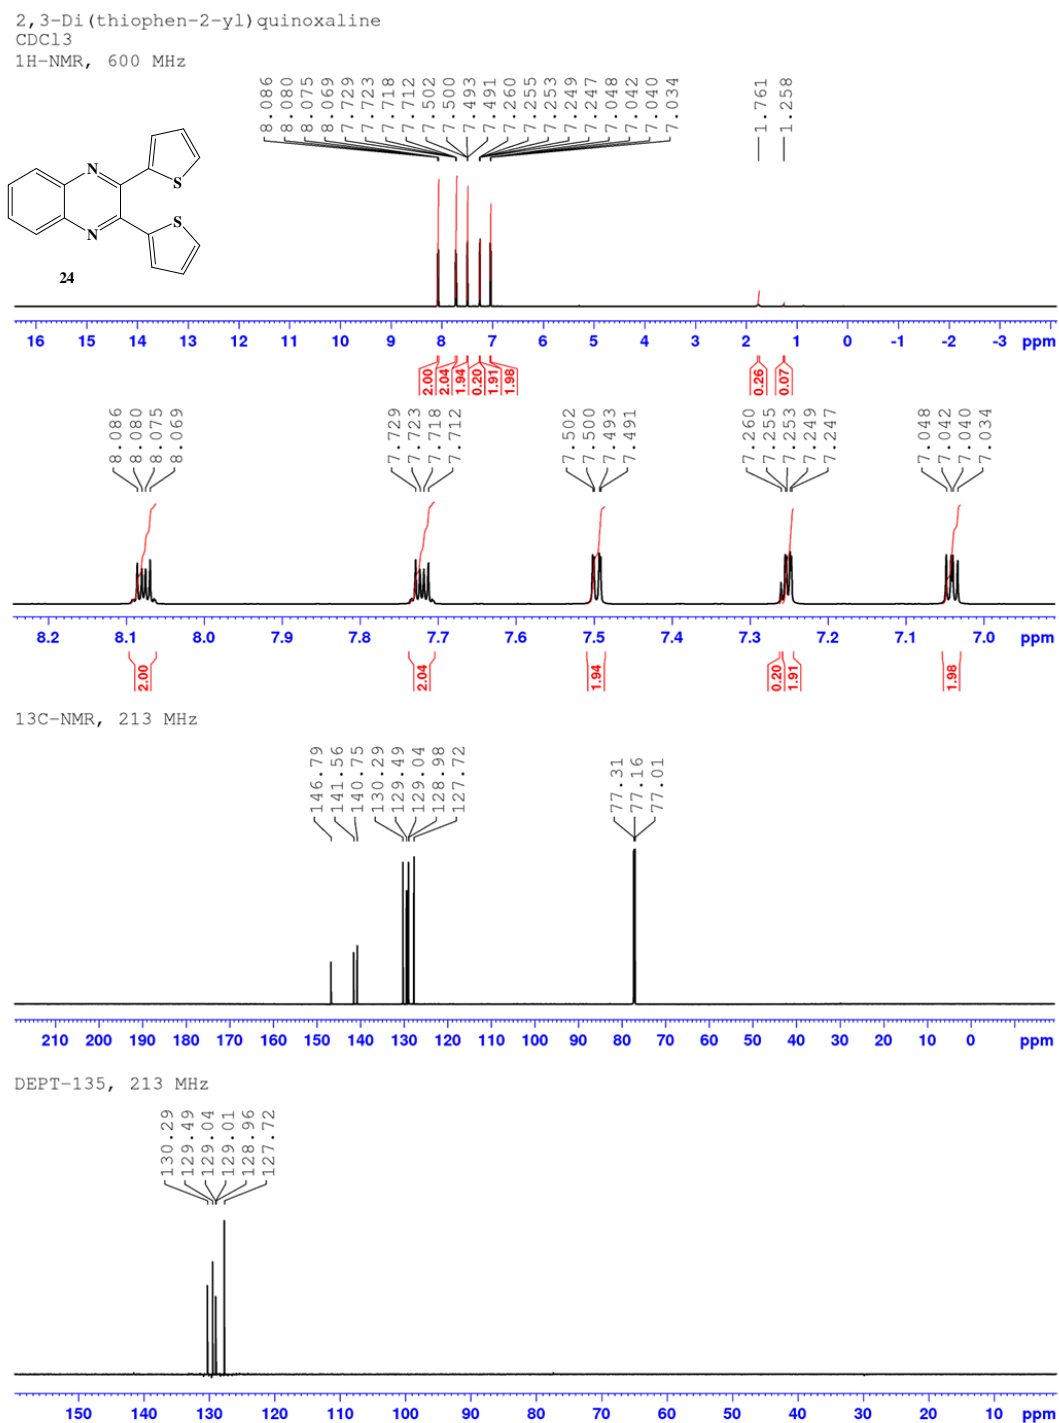

**Figure S58.** <sup>1</sup>H-NMR, <sup>13</sup>C-NMR and DEPT-135 spectra in CDCl<sub>3</sub> of **24**.

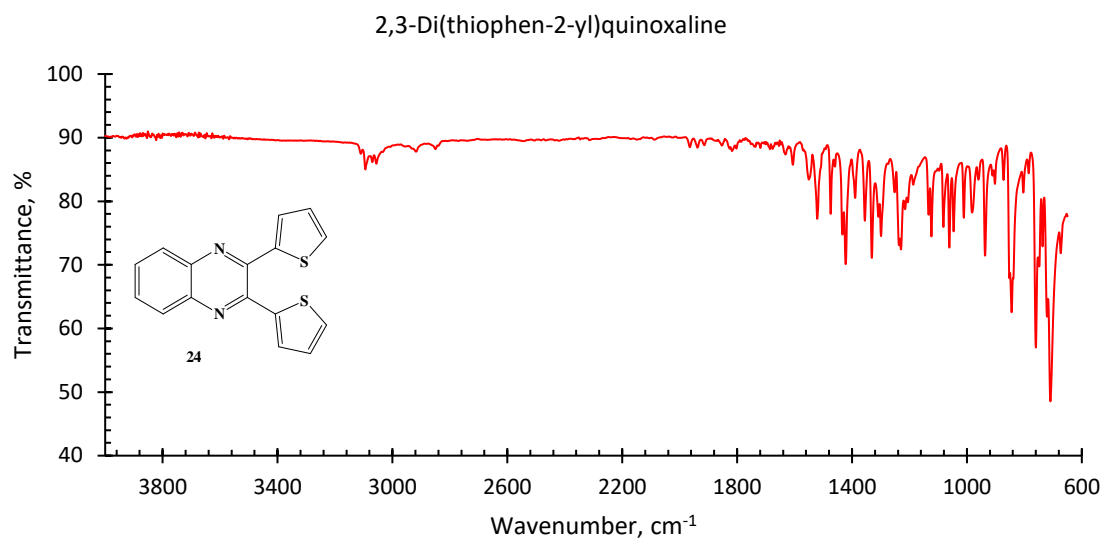

**Figure S59.** FTIR spectrum of **24**.

4-(3-Chloroquinoxalin-2-yl)benzaldehyde

CDCl<sub>3</sub>

<sup>1</sup>H-NMR, 850 MHz

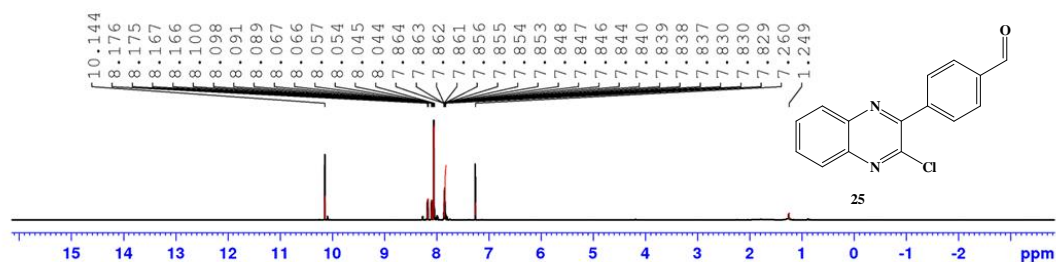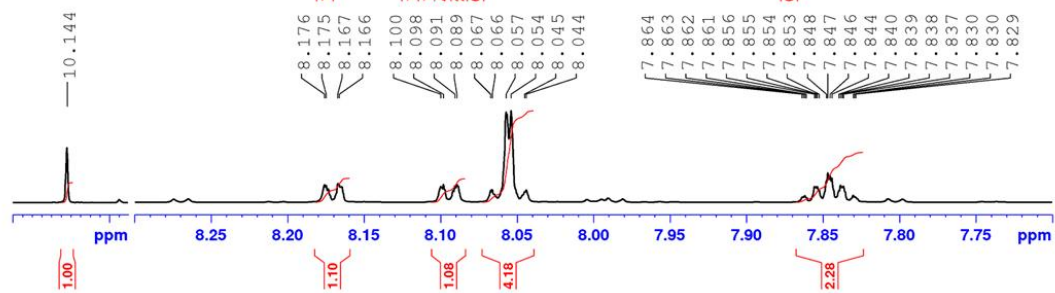

<sup>13</sup>C-NMR, 213 MHz

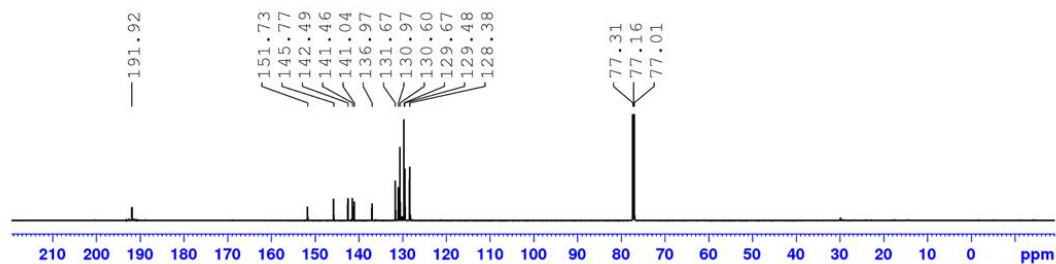

DEPT-135, 213 MHz

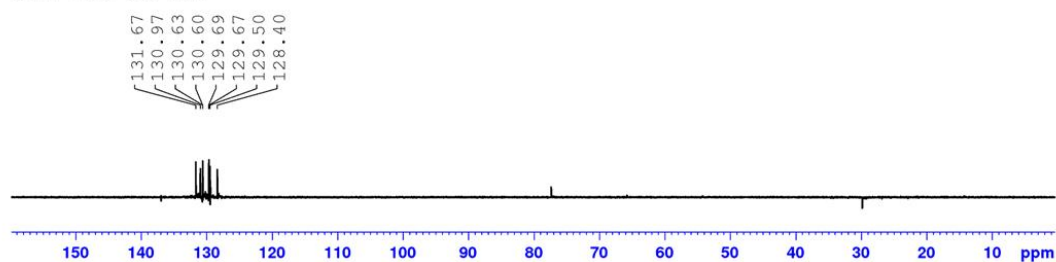

**Figure S60.** <sup>1</sup>H-NMR, <sup>13</sup>C-NMR and DEPT-135 spectra in CDCl<sub>3</sub> of **25**.

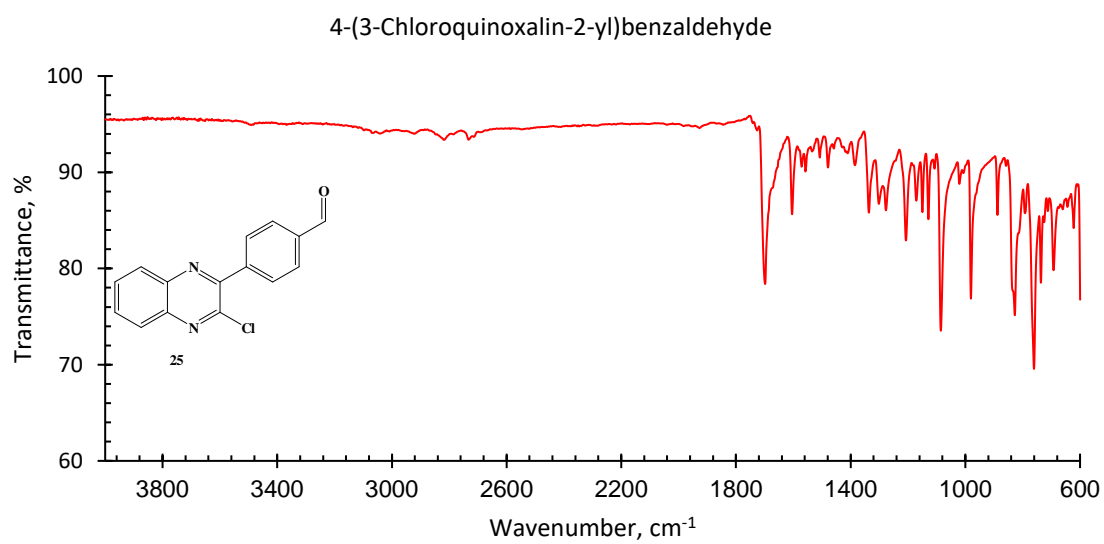

**Figure S61.** FTIR spectrum of **25**.

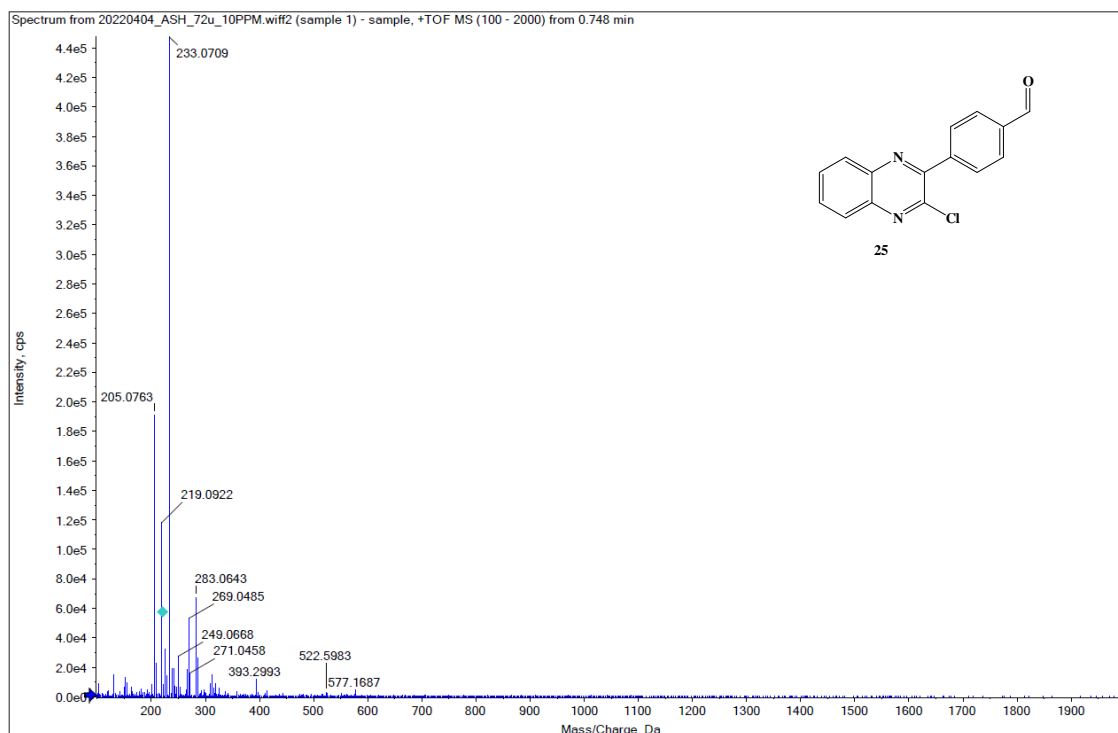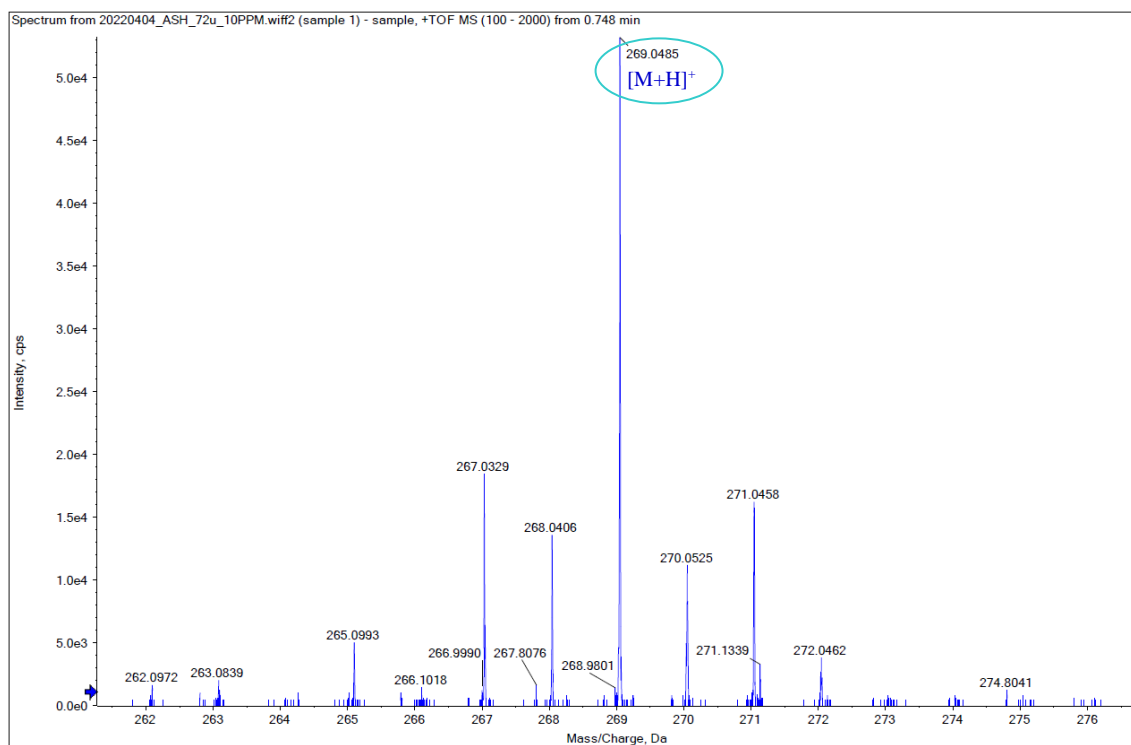

**Figure S62.** HRMS spectrum of **25**.

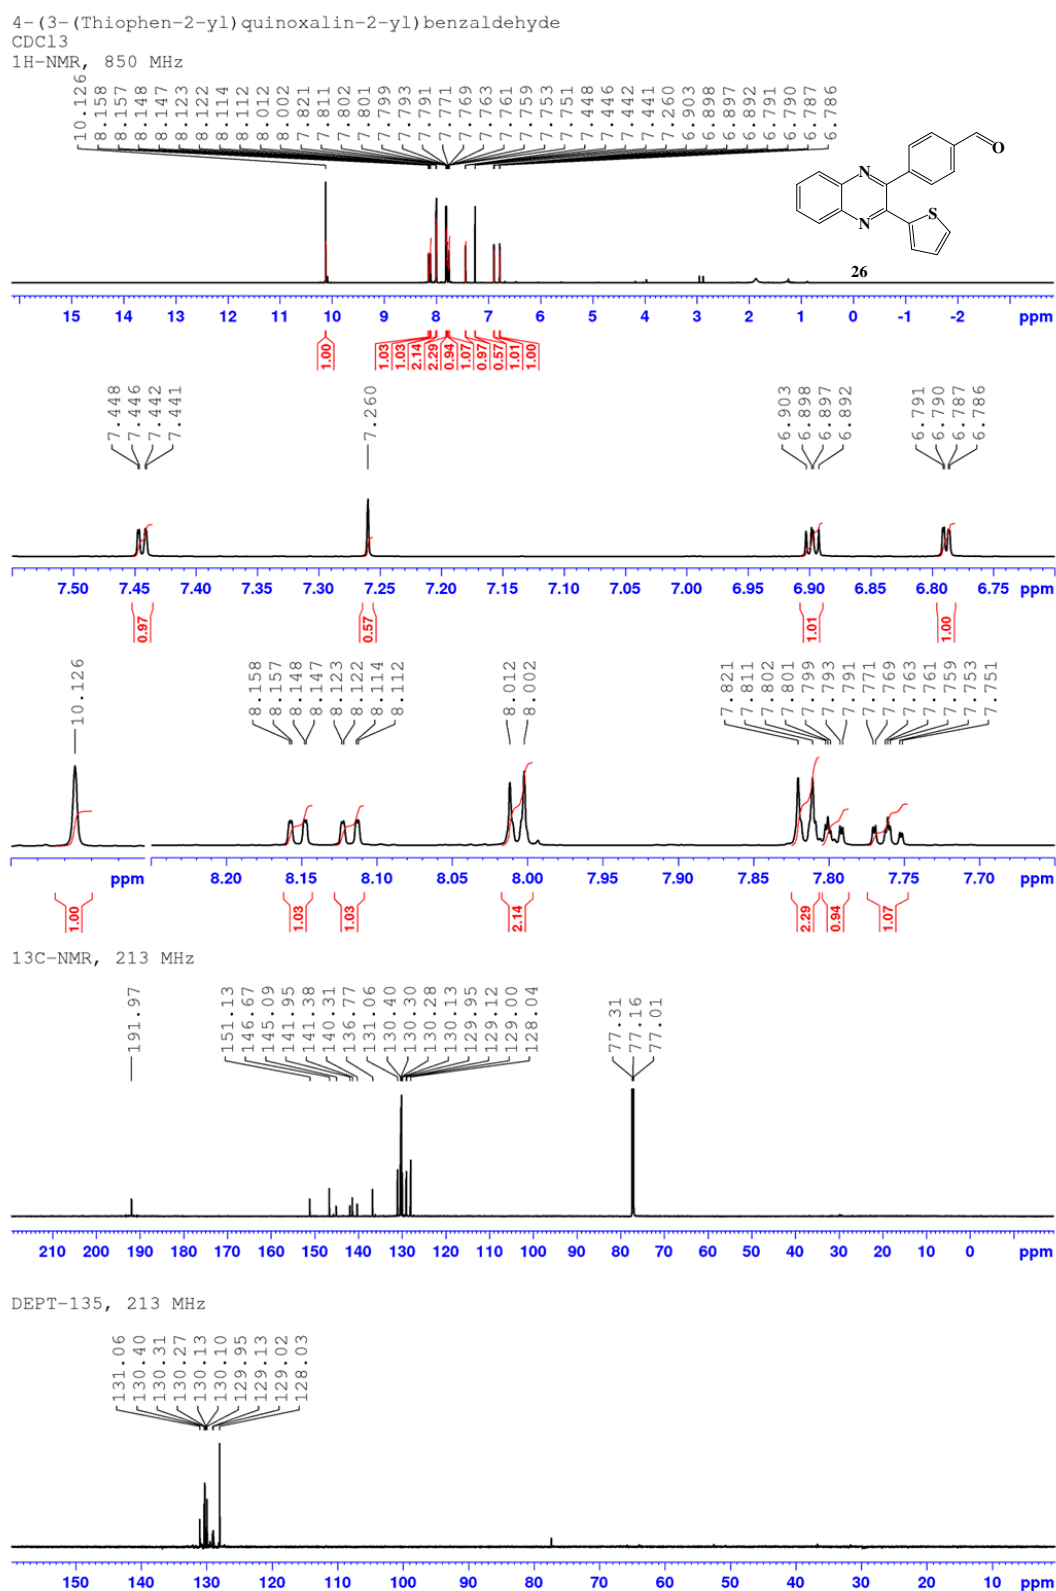

**Figure S63.** <sup>1</sup>H-NMR, <sup>13</sup>C-NMR and DEPT-135 spectra in CDCl<sub>3</sub> of **26**.



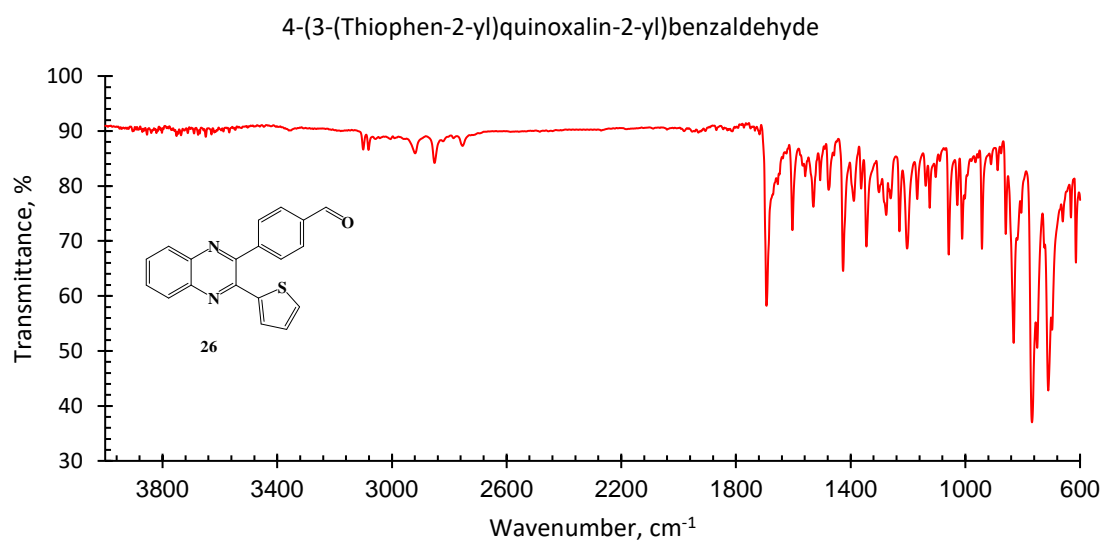

**Figure S64.** FTIR spectrum of **26**.

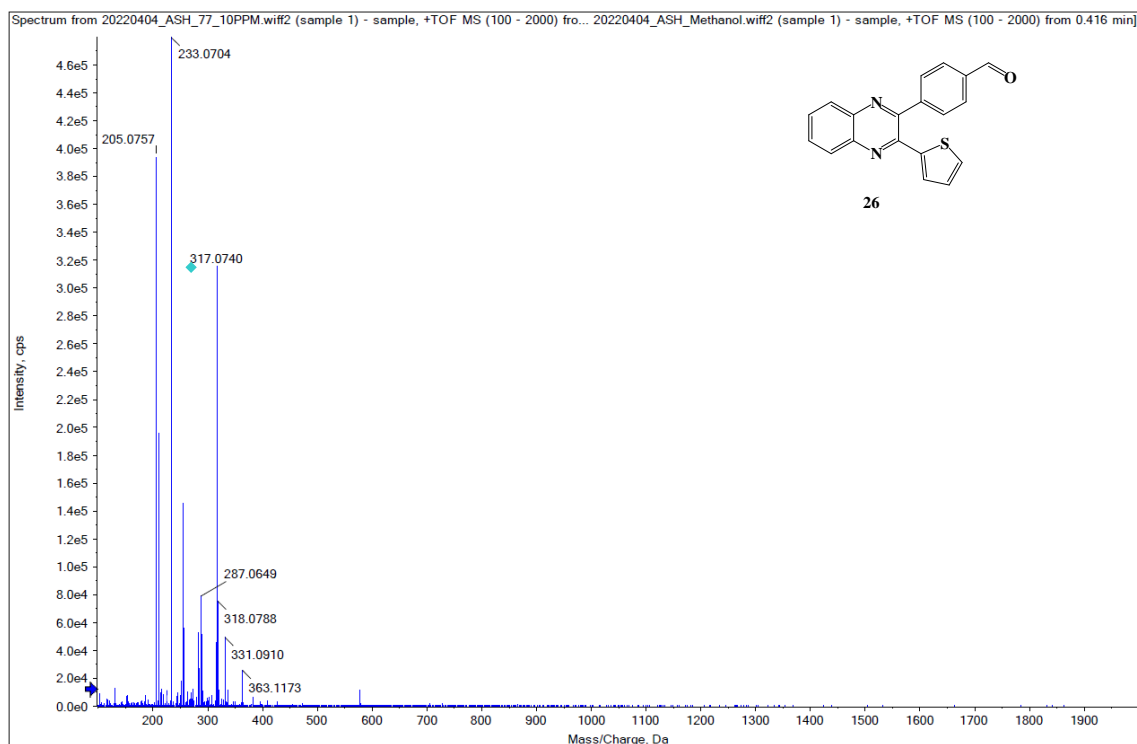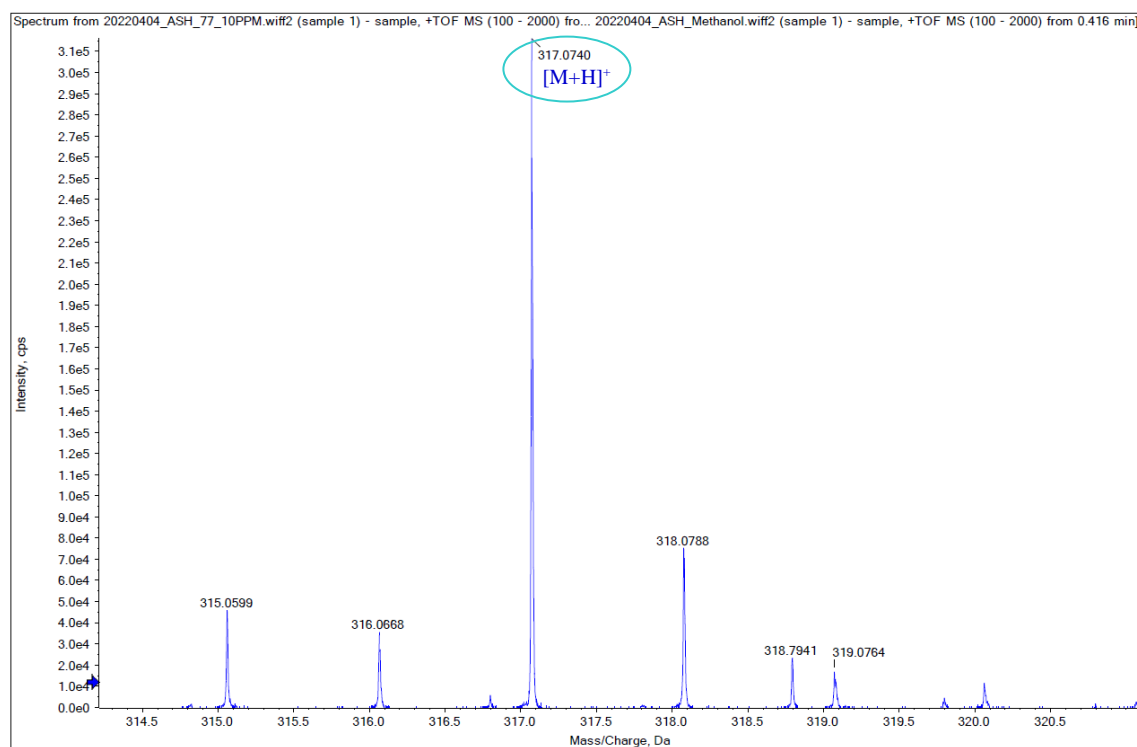

**Figure S65.** HRMS spectrum of **26**.

4-(3-(5-Bromothiophen-2-yl)quinoxalin-2-yl)benzaldehyde  
 CDCl<sub>3</sub>  
 1H-NMR, 850 MHz

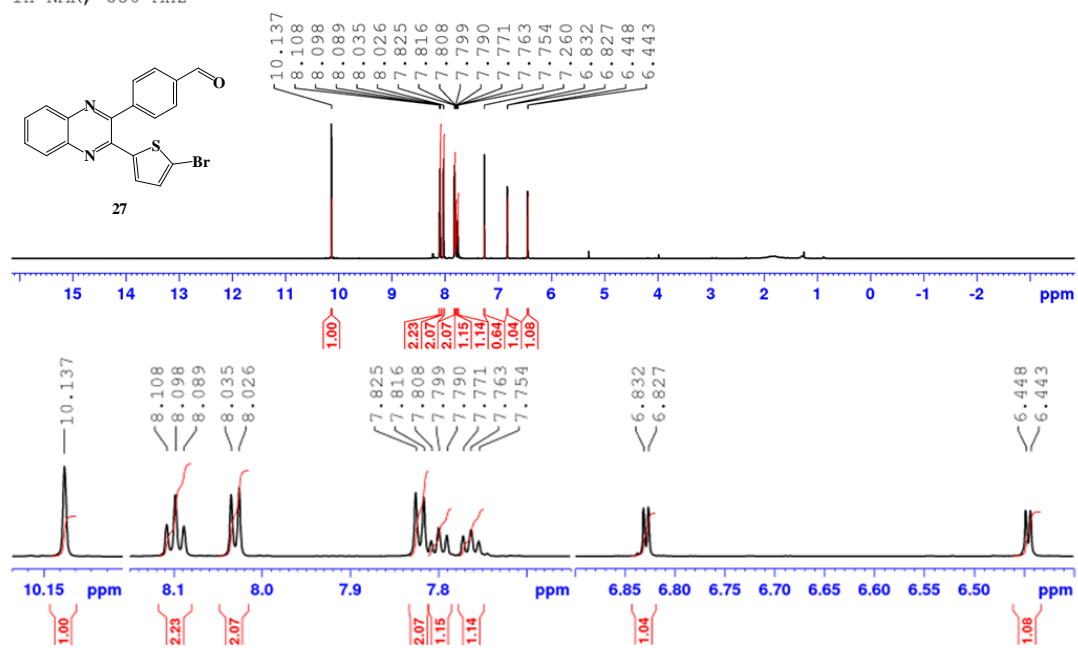

13C-NMR, 213 MHz

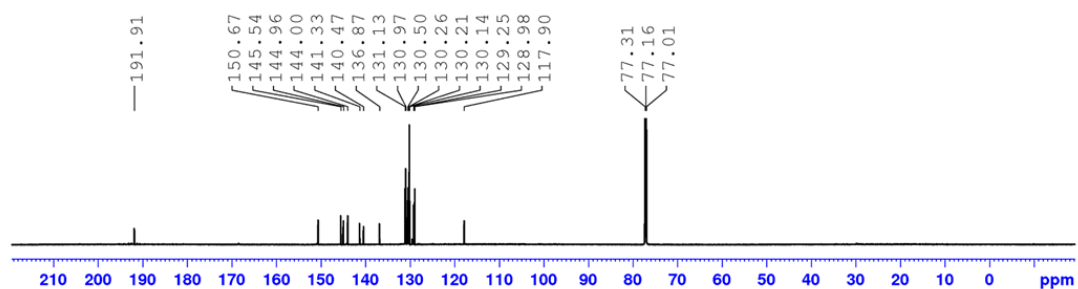

DEPT-135, 213 MHz

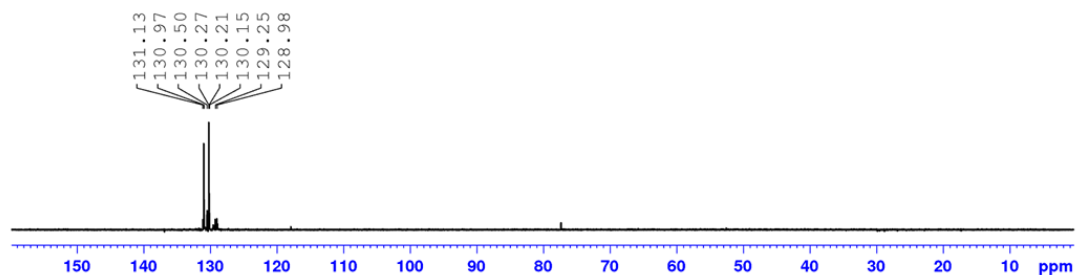

**Figure S66.** <sup>1</sup>H-NMR, <sup>13</sup>C-NMR and DEPT-135 spectra in CDCl<sub>3</sub> of **27**.

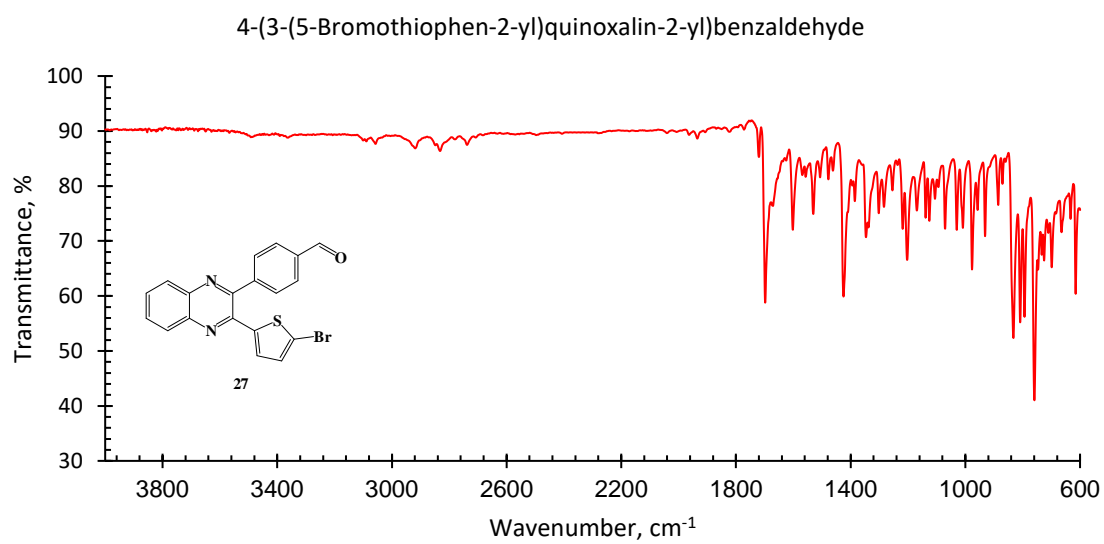

**Figure S67.** FTIR spectrum of **27**.

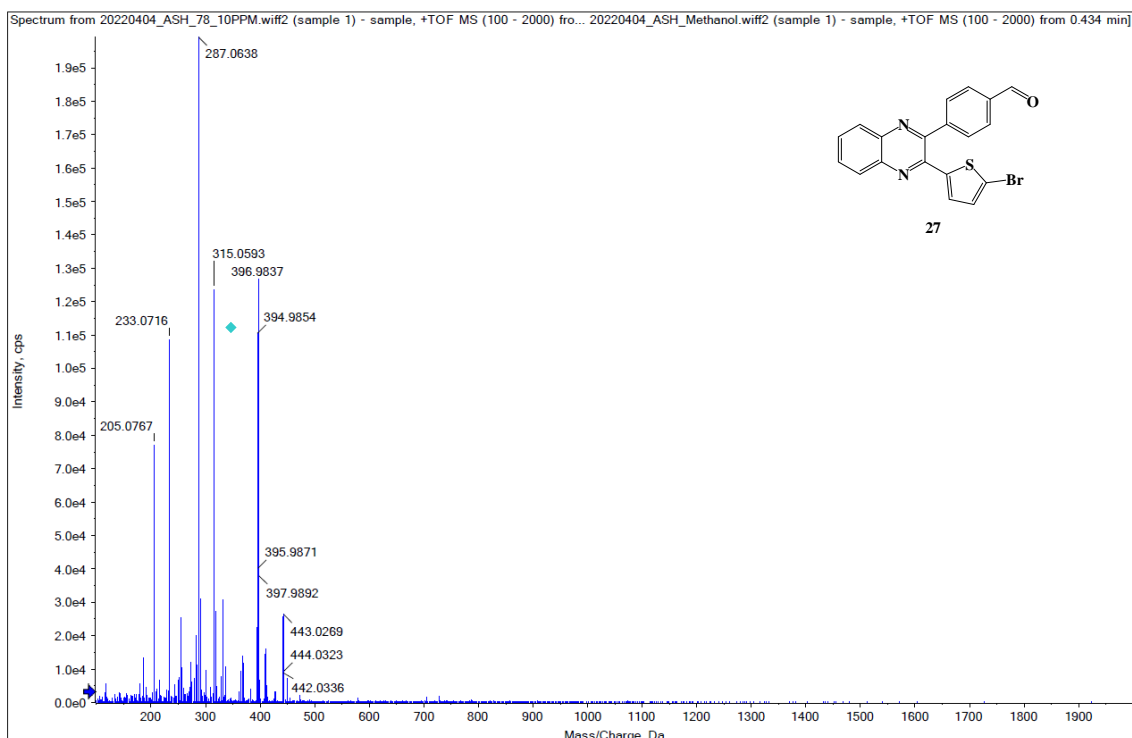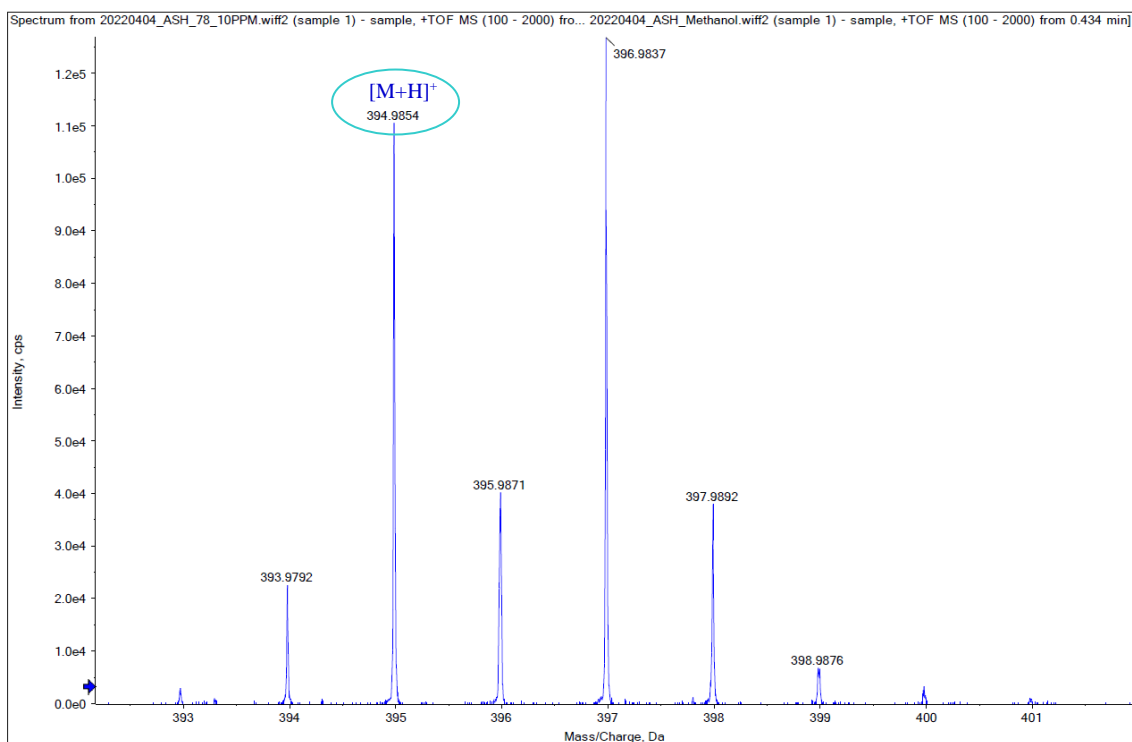

**Figure S68.** HRMS spectrum of **27**.

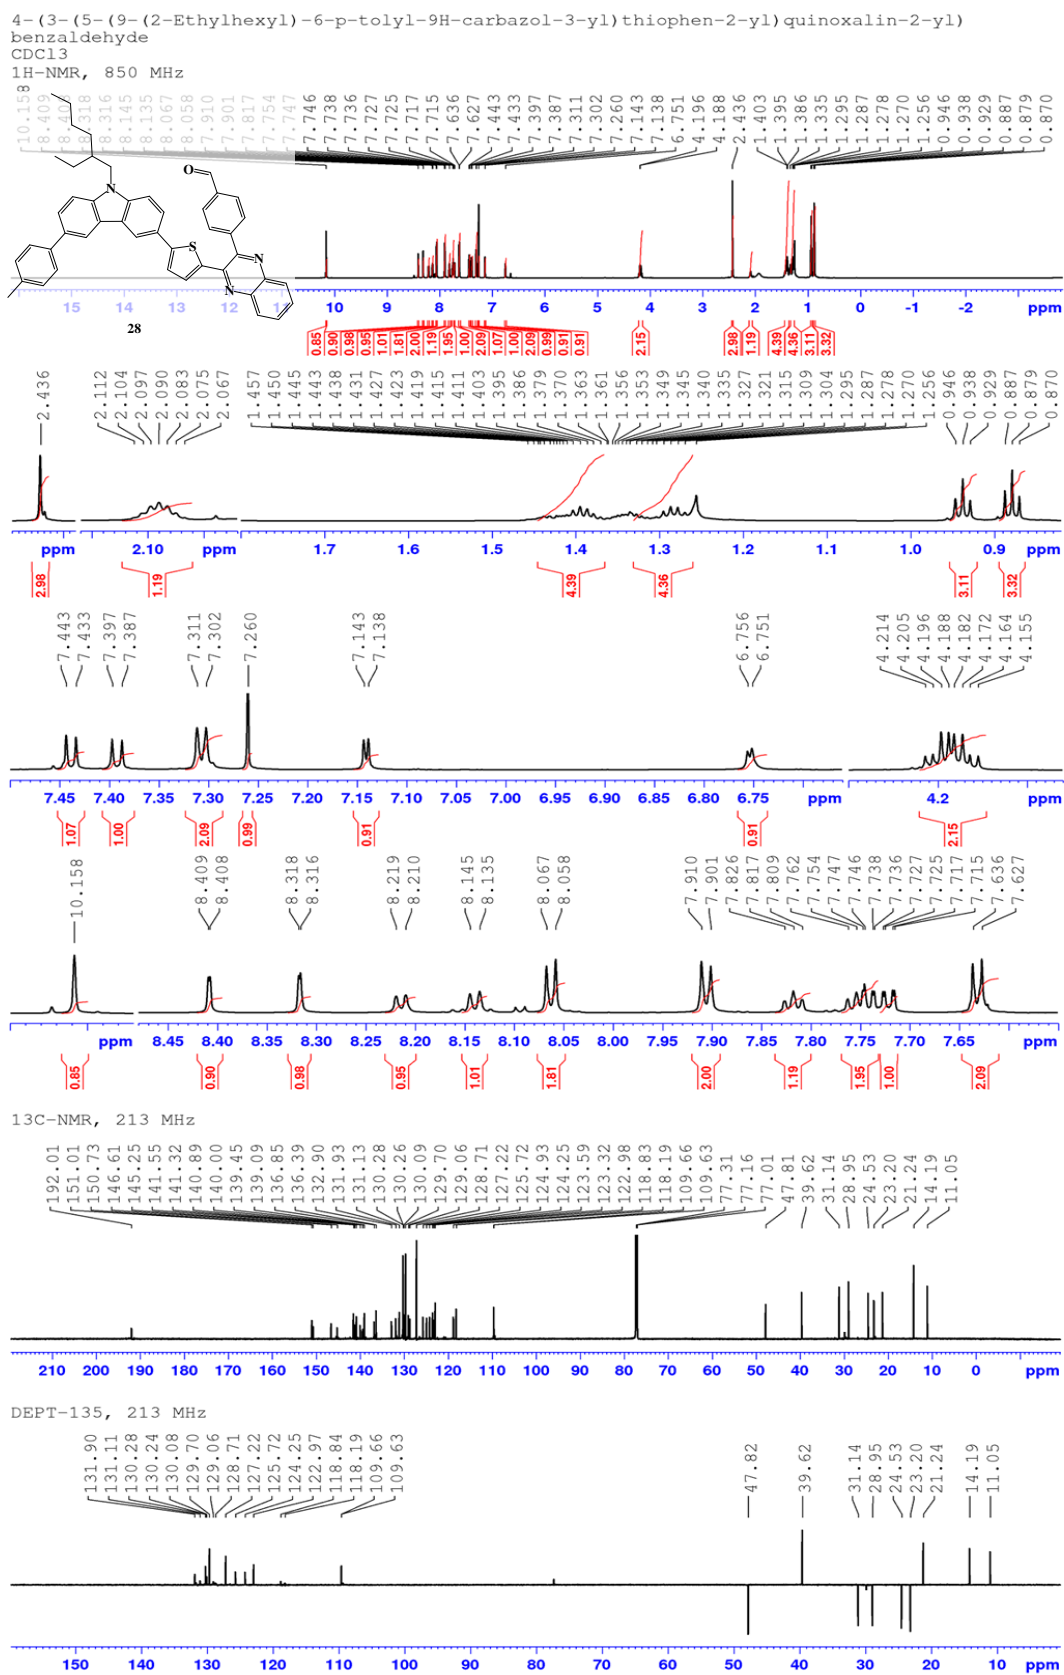

**Figure S69.** <sup>1</sup>H-NMR, <sup>13</sup>C-NMR and DEPT-135 spectra in CDCl<sub>3</sub> of **28**.

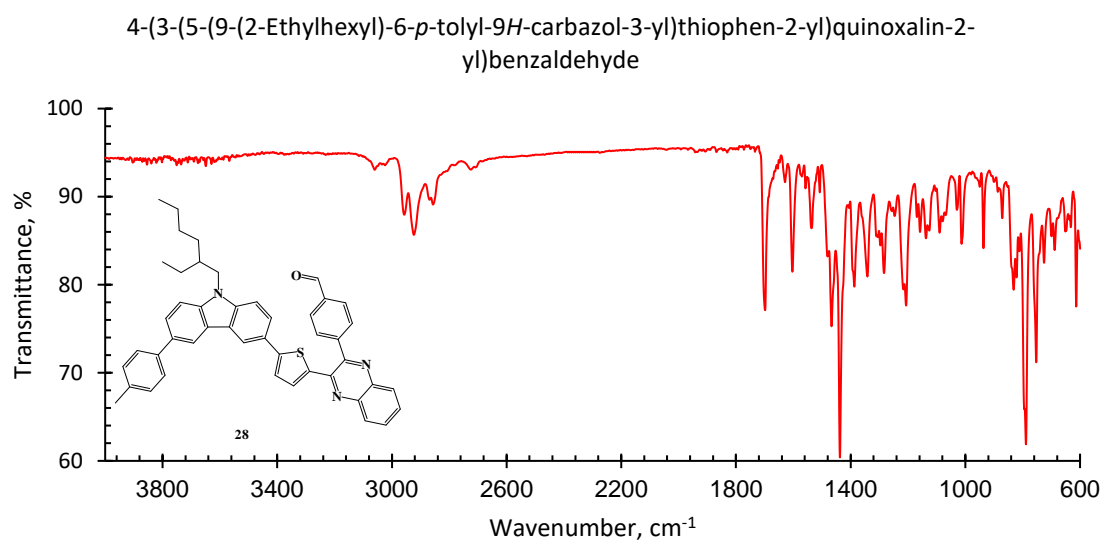

**Figure S70.** FTIR spectrum of **28**.

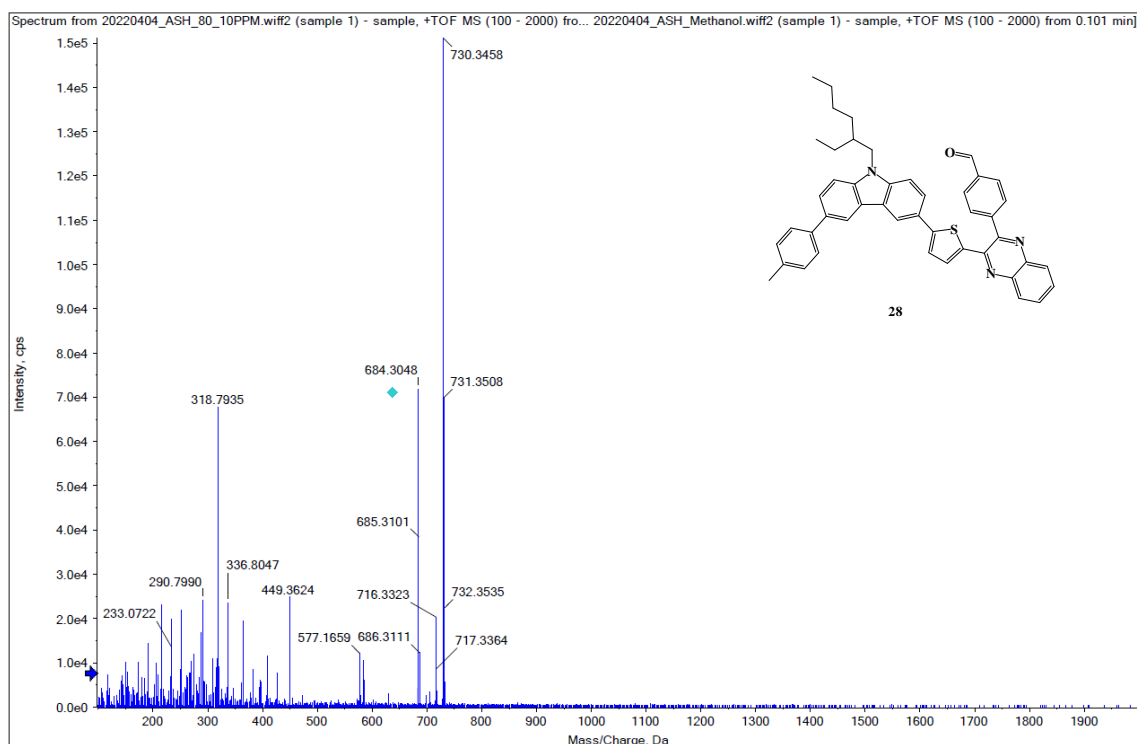



2,3-Bis(5-bromothiophen-2-yl)quinoxaline  
 CDCl<sub>3</sub>  
 1H-NMR, 850 MHz

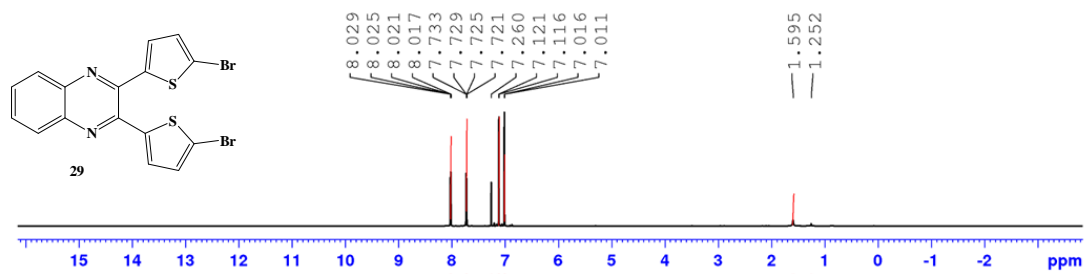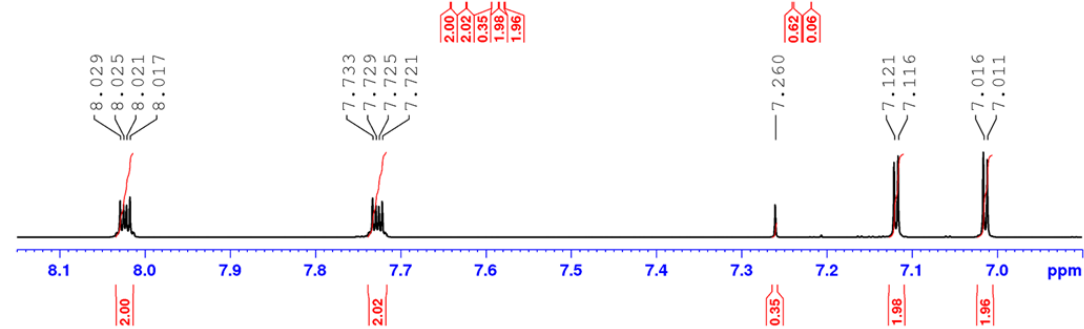

<sup>13</sup>C-NMR, 213 MHz

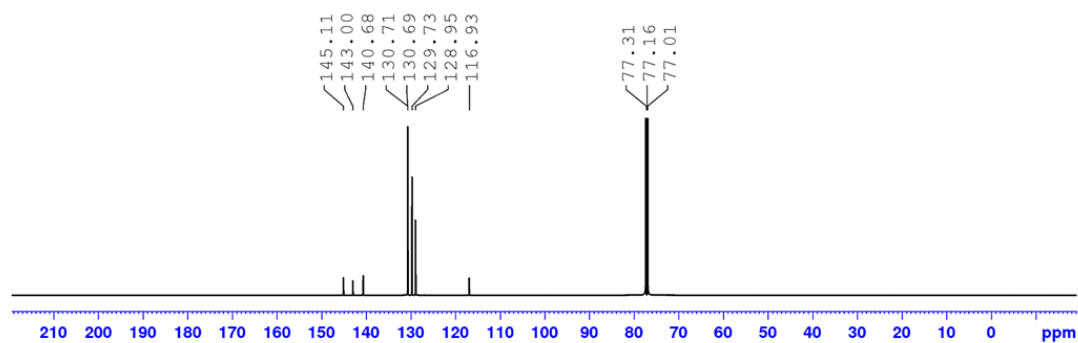

DEPT-135, 213 MHz

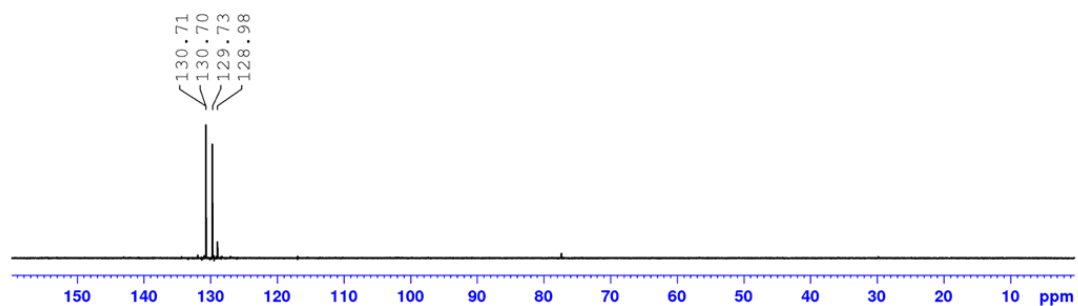

**Figure S72.** <sup>1</sup>H-NMR, <sup>13</sup>C-NMR and DEPT-135 spectra in CDCl<sub>3</sub> of **29**.

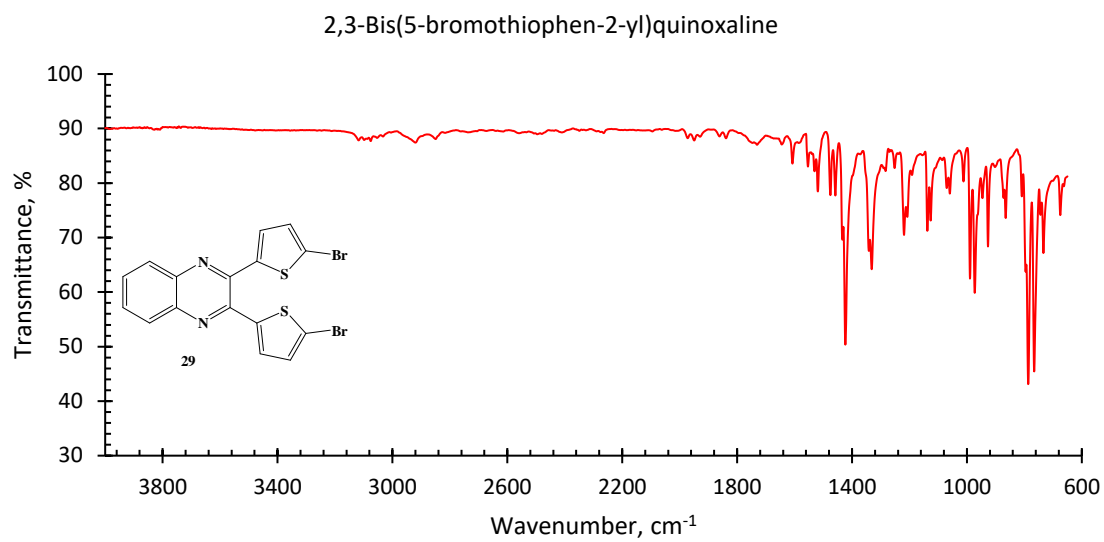

**Figure S73.** FTIR spectrum of **29**.

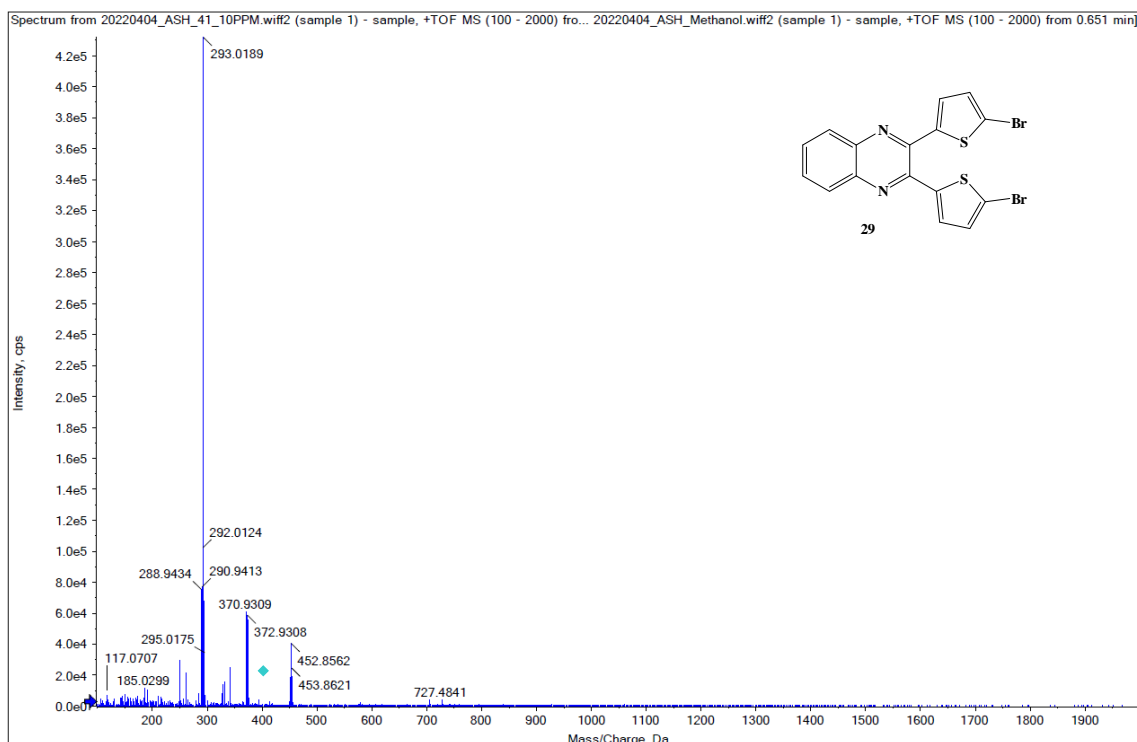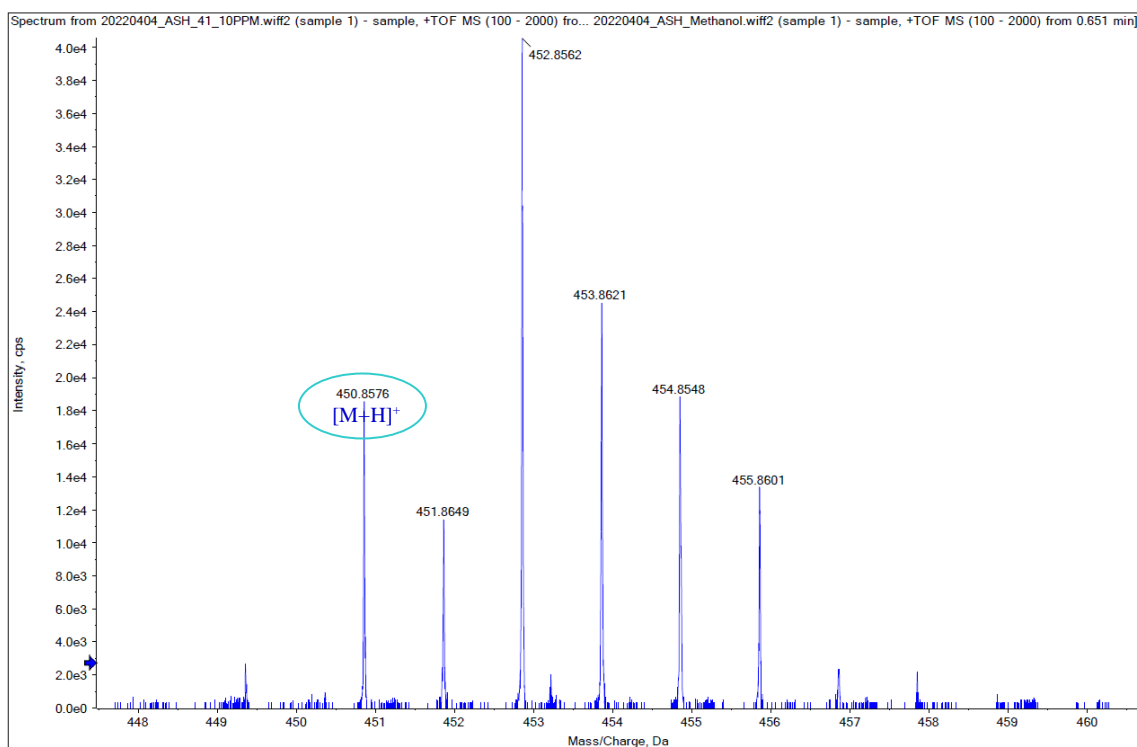

**Figure S74.** HRMS spectrum of **29**.

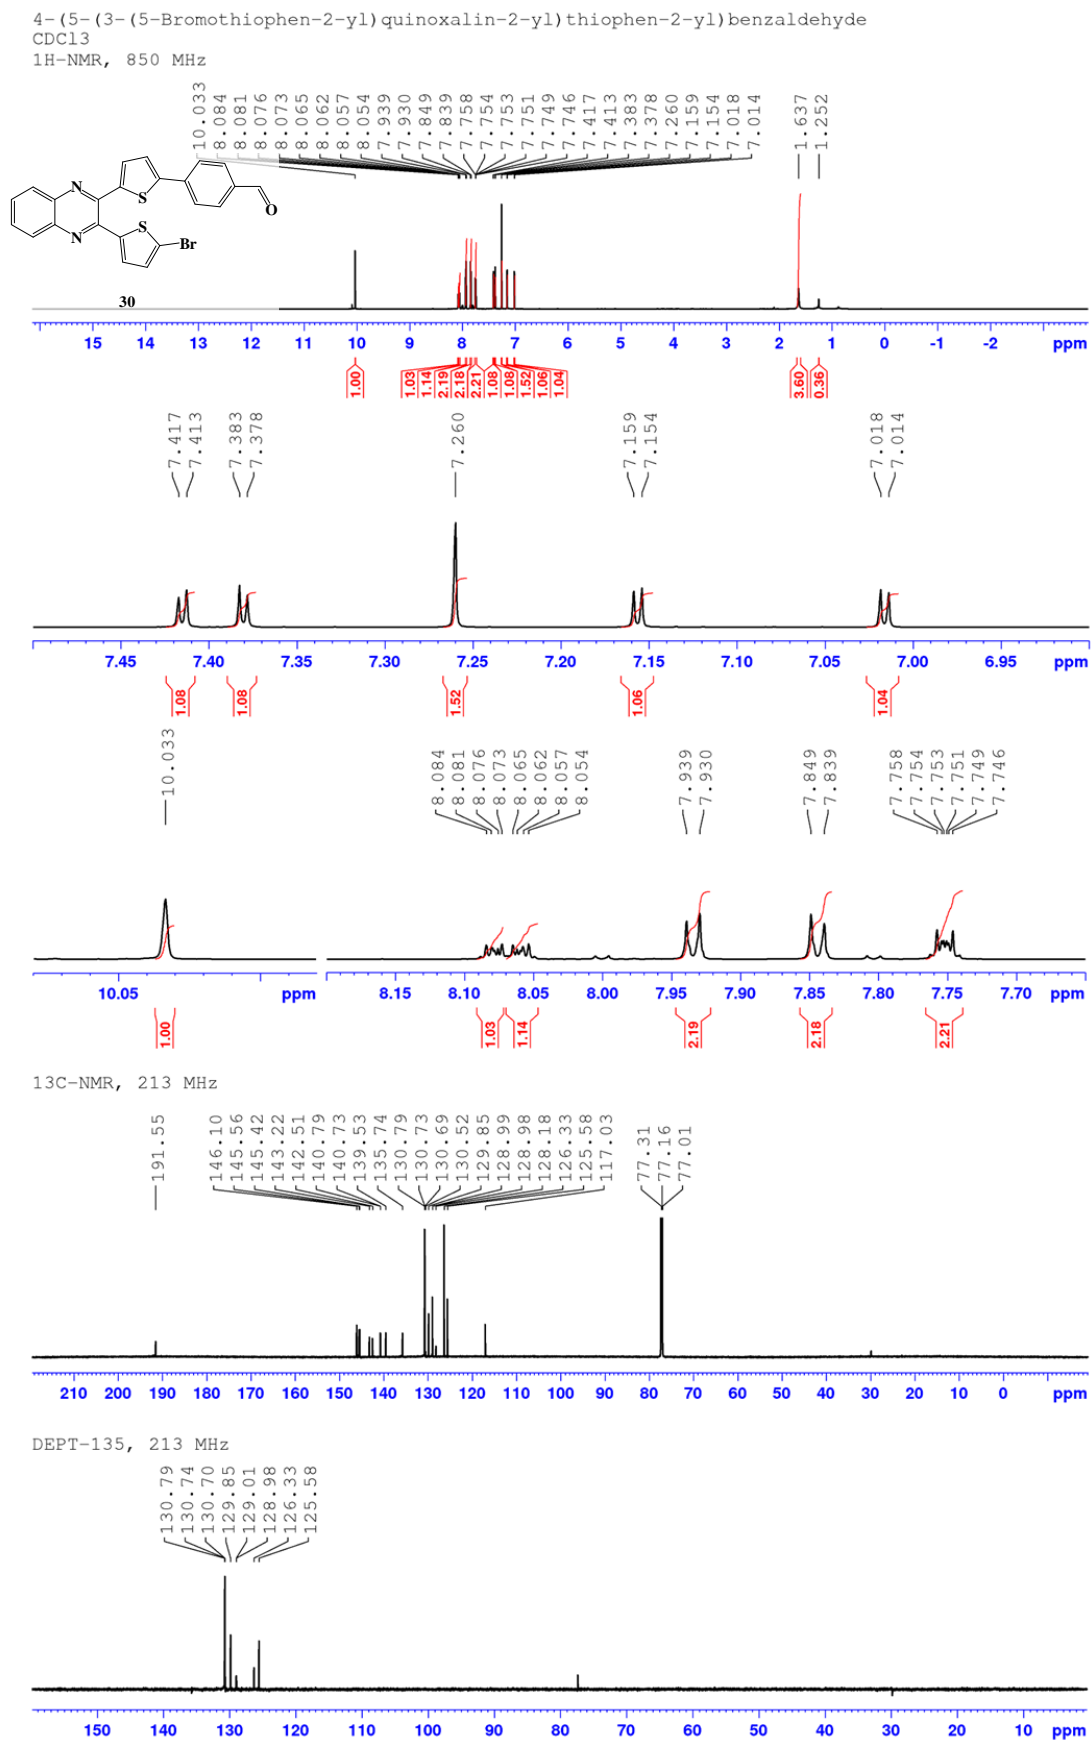

**Figure S75.** <sup>1</sup>H-NMR, <sup>13</sup>C-NMR and DEPT-135 spectra in CDCl<sub>3</sub> of **30**.

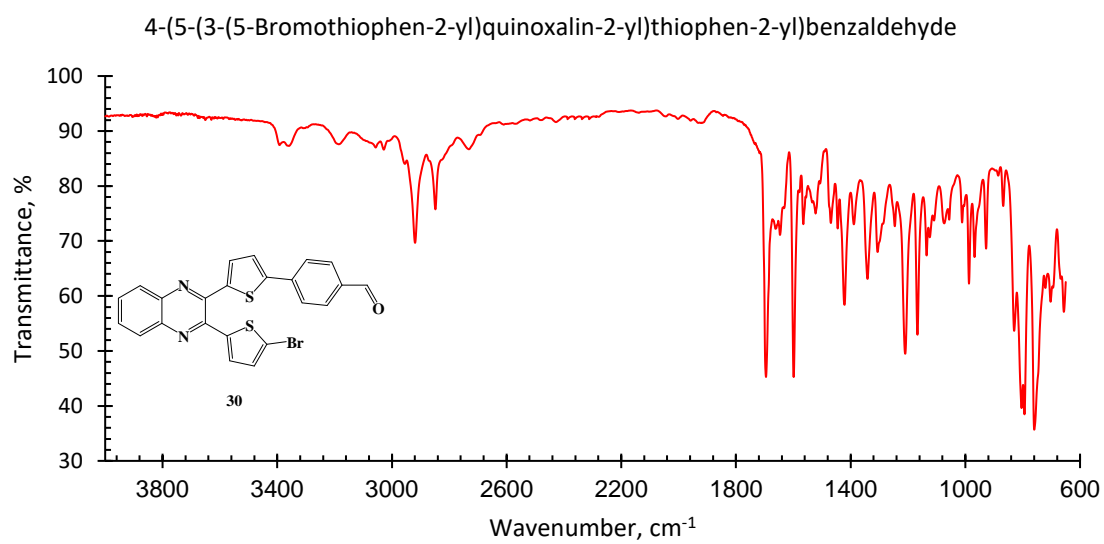

**Figure 76.** FTIR spectrum of **30**.

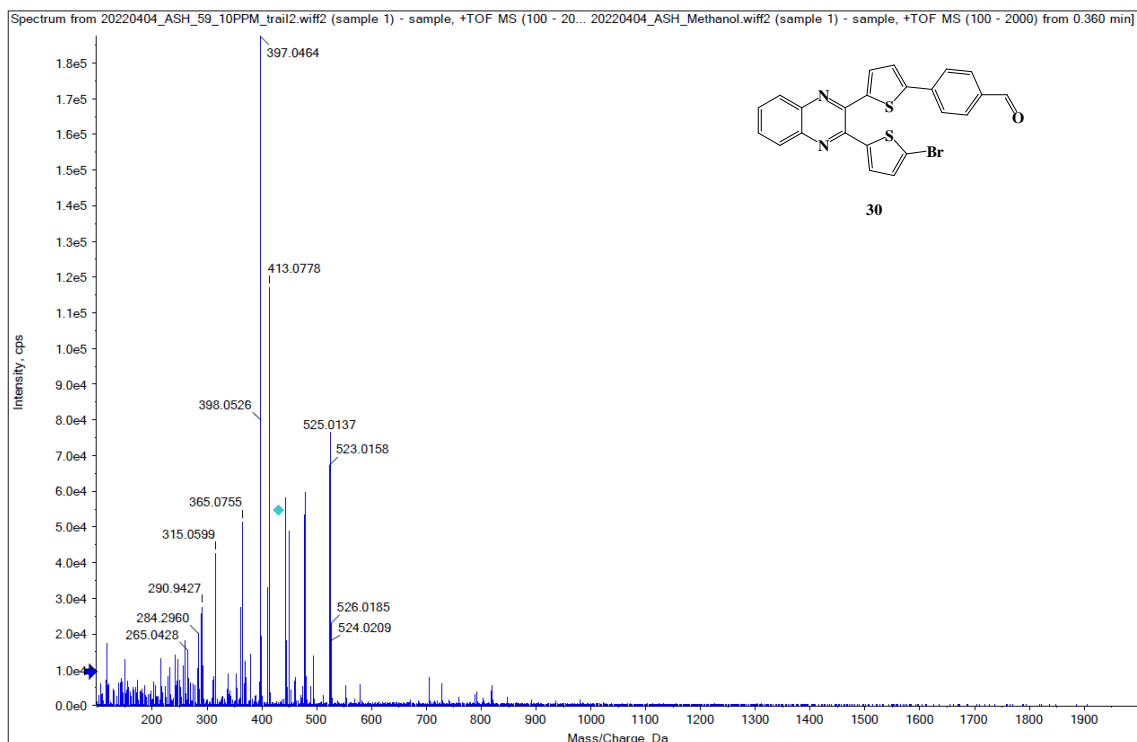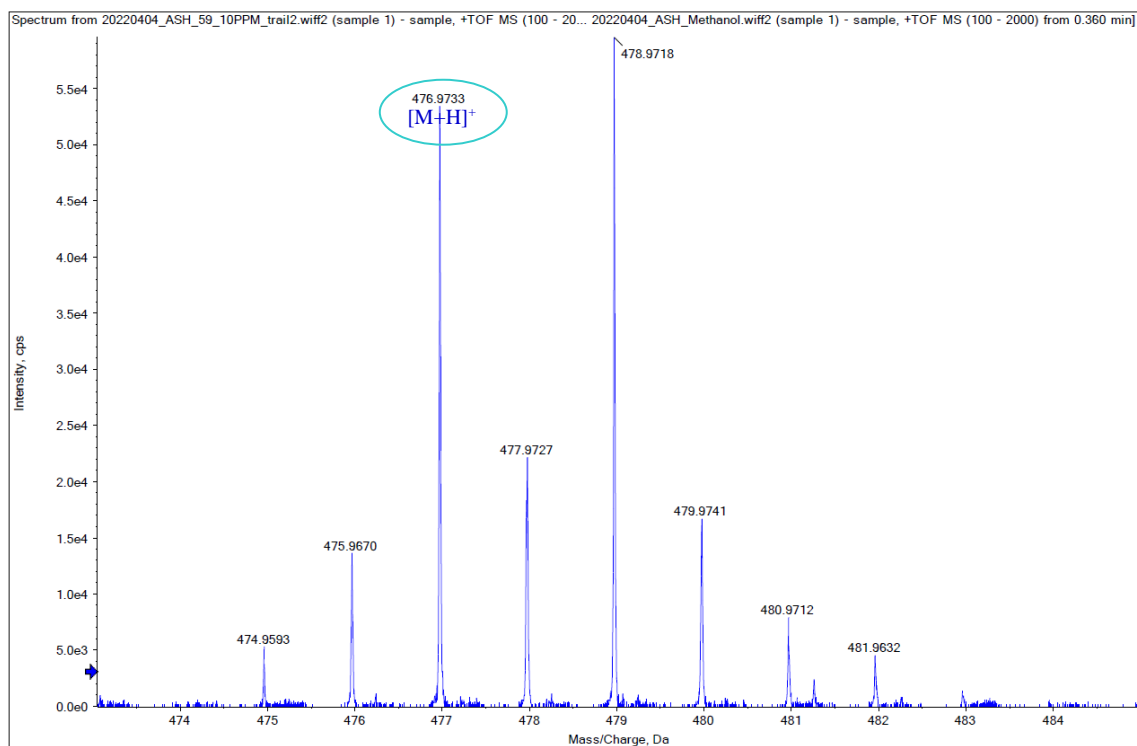

**Figure S77.** HRMS spectrum of **30**.

**Figure S78.**  $^1\text{H}$ -NMR,  $^{13}\text{C}$ -NMR and DEPT-135 spectra in  $\text{CDCl}_3$  of **31**.

4-(5-(3-(5-(9-(2-Ethylhexyl)-6-*p*-tolyl-9*H*-carbazol-3-yl)thiophen-2-yl)quinoxalin-2-yl)thiophen-2-yl)benzaldehyde

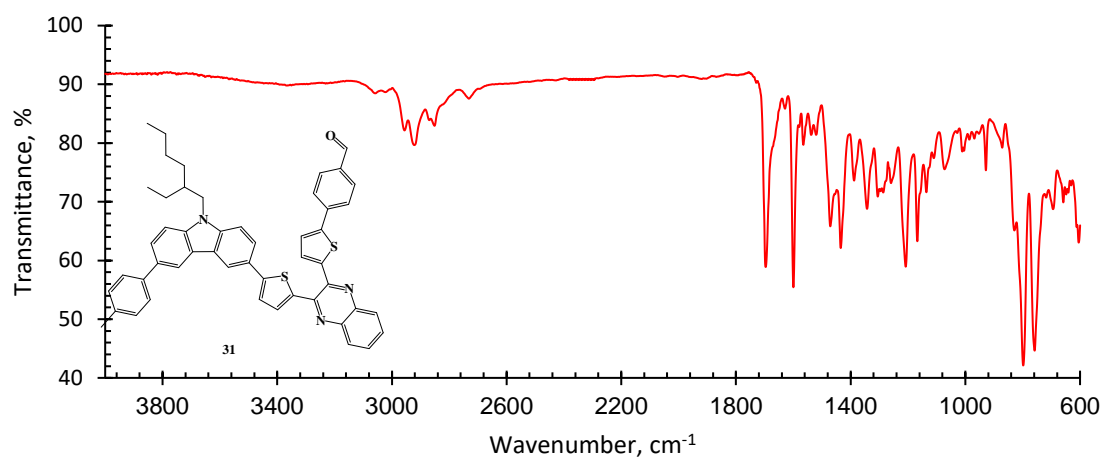

**Figure S79.** FTIR spectrum of **31**.



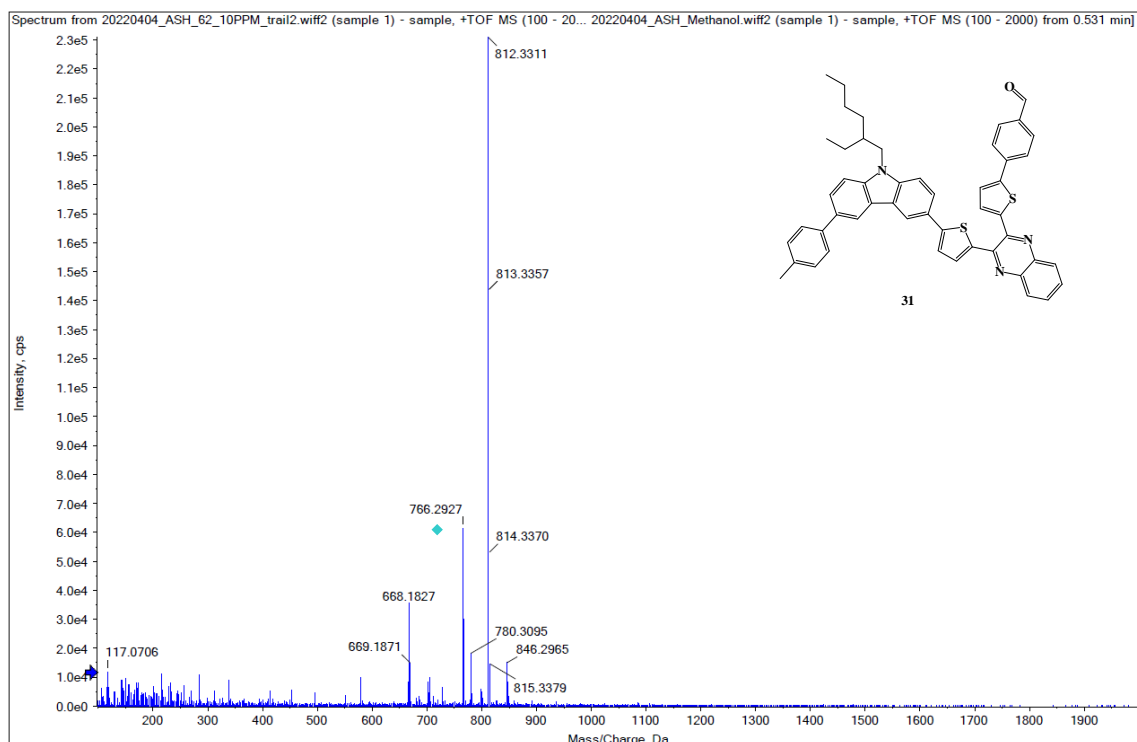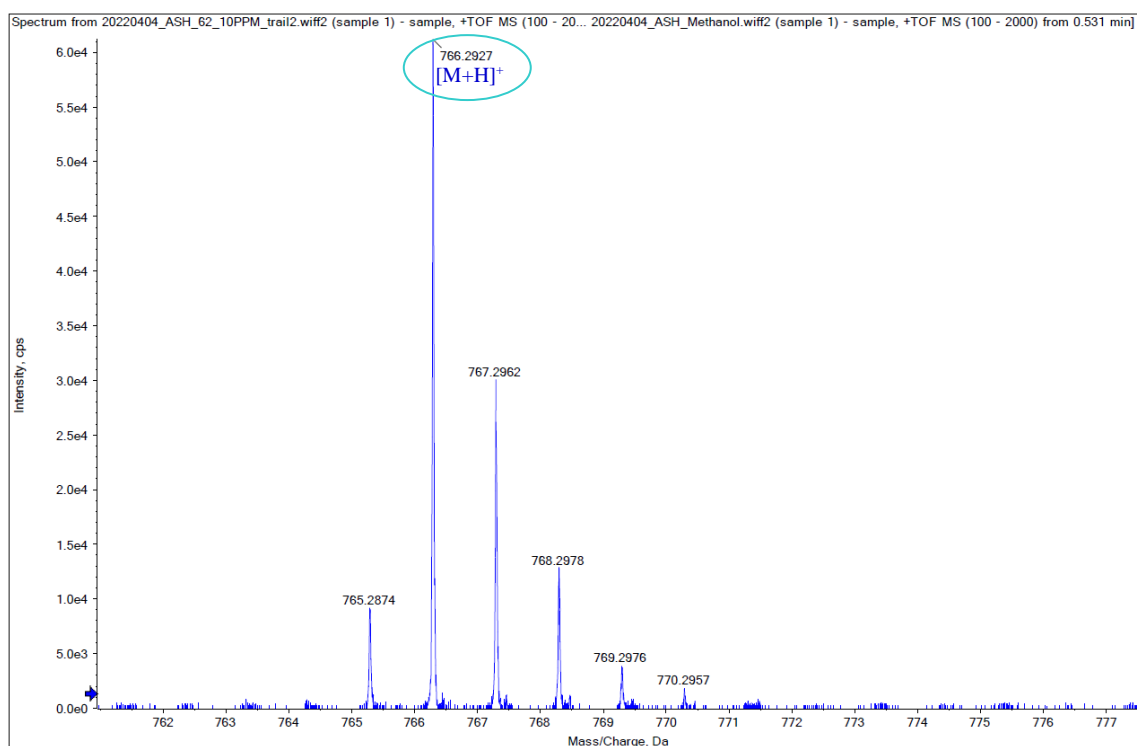

**Figure S80.** HRMS spectrum of **31**.

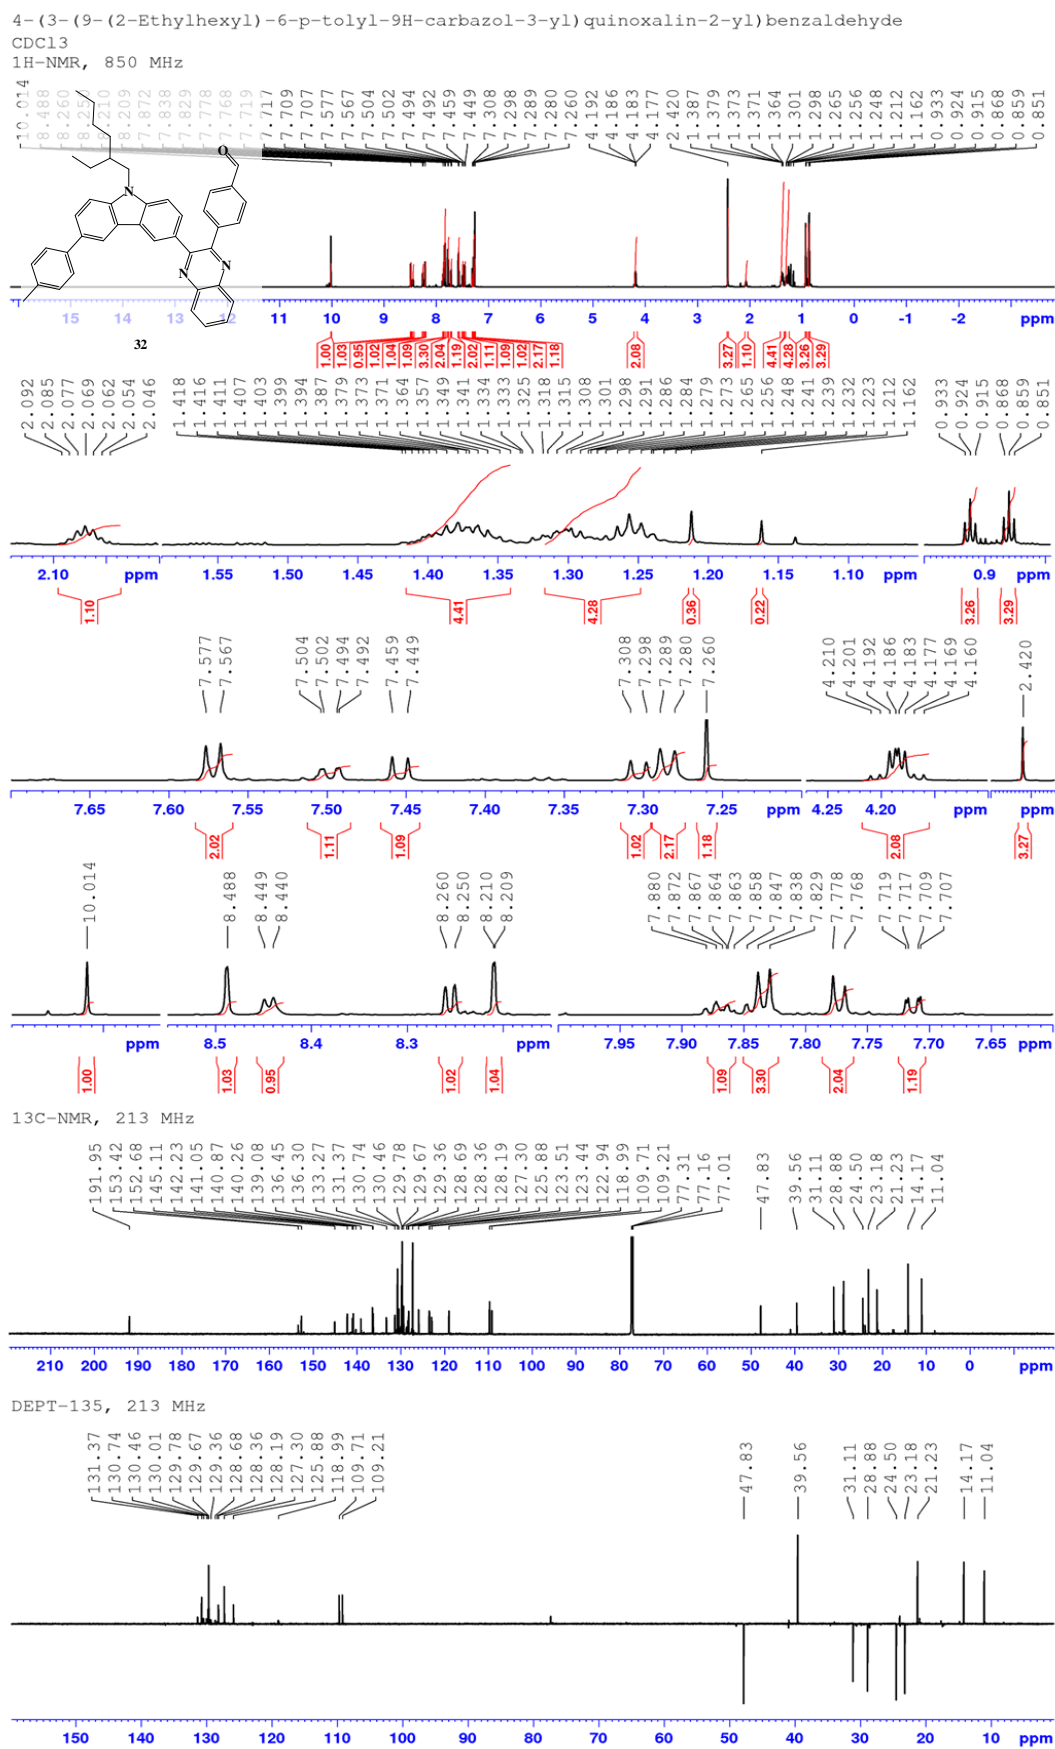

Figure S81. <sup>1</sup>H-NMR, <sup>13</sup>C-NMR and DEPT-135 spectra in CDCl<sub>3</sub> of **32**.

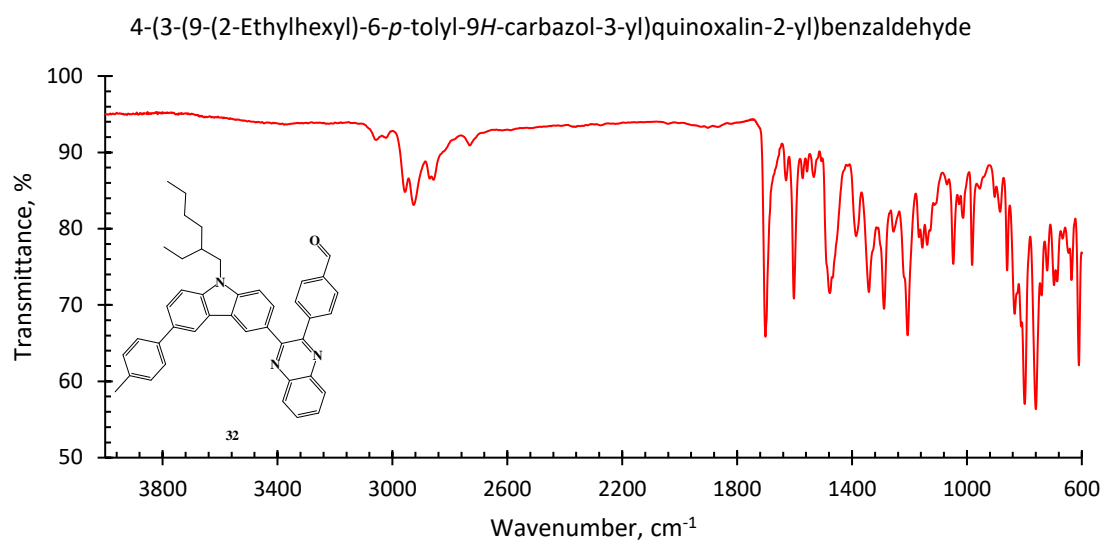

**Figure S82.** FTIR spectrum of **32**.

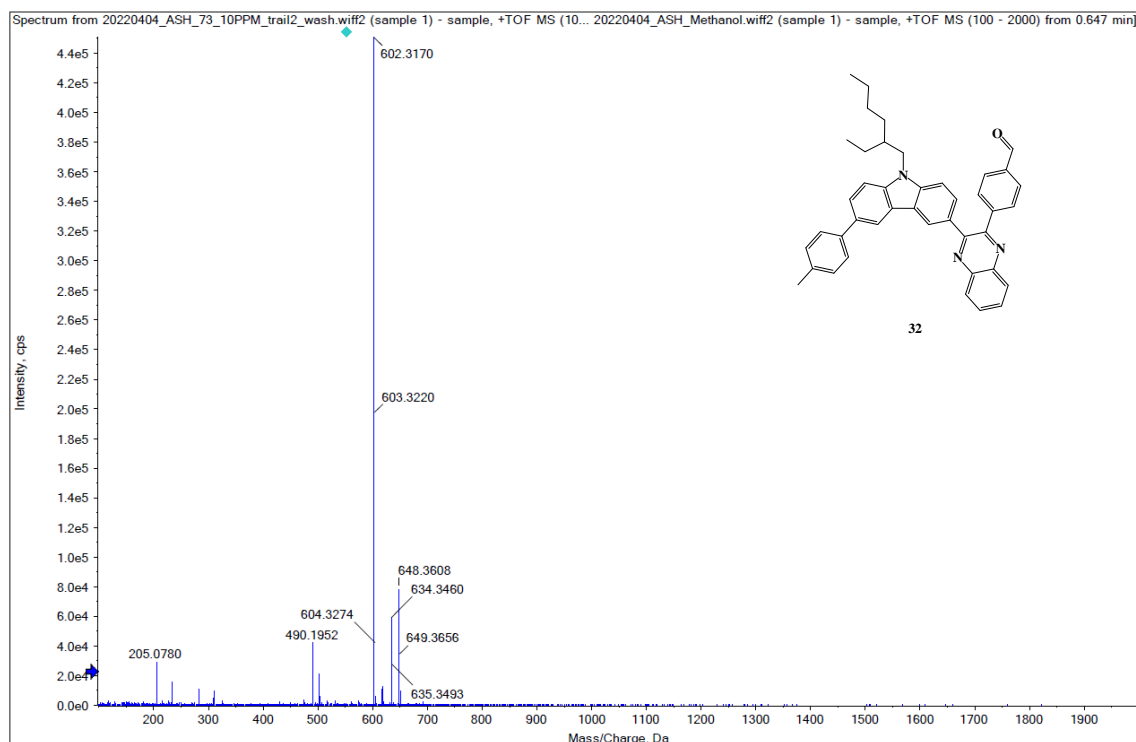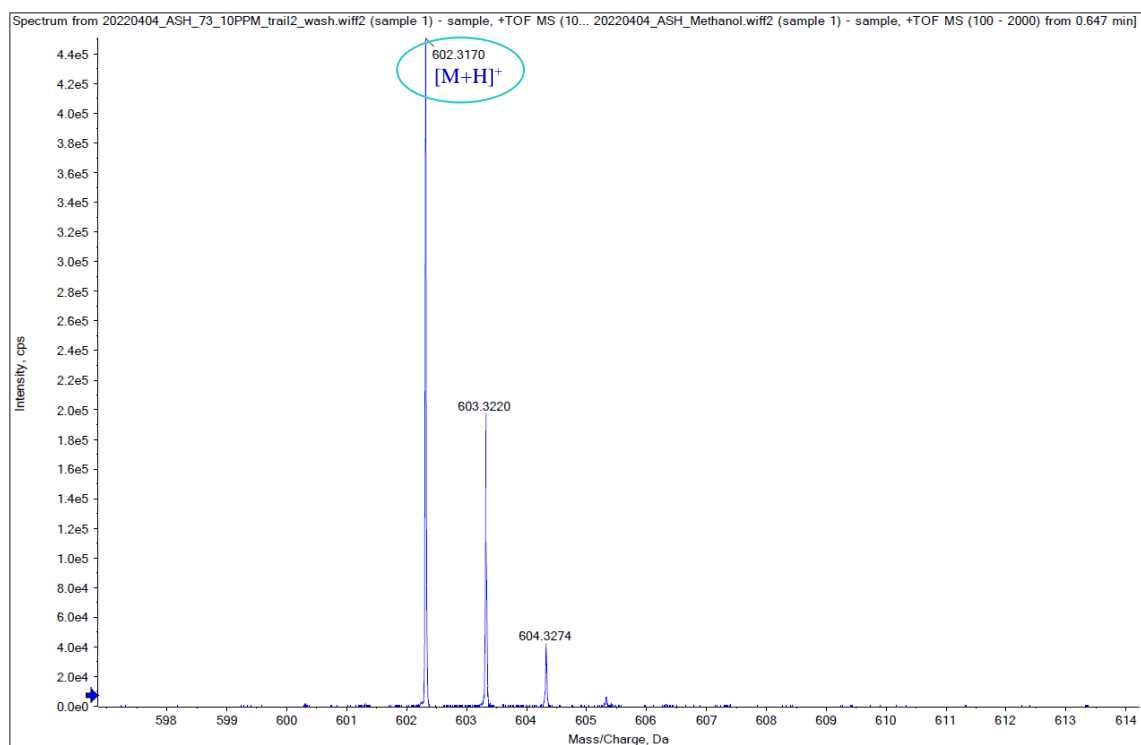

**Figure S83.** HRMS spectrum of **32**.
